# Supplementary material for: A survey of research quality in core facilities
Source: eLife. 2020 Nov 26;9:e62212. doi: 10.7554/eLife.62212 (PMC7714392; doi:10.7554/eLife.62212)
Supplement: Supplementary file 2. [file elife-62212-supp2.xlsx]

## Sheet: Introduction
	Sheet:
	Q-CoFa Survey 1	12.2019	Raw data. The 1st survey is a pilot survey.
	Q-CoFa Survey 2	01.2020	Raw data. The 2nd survey is an improved version based on the answers from the 1st survey.
			Results of both survey were combined. In 3 cases where it was not possible only the results of the 2nd survey were used.
	1, 2, 3, …		The survey has 10 sections which are split on 10 different numbered sheet. Some sheet are futher split (a, b, c, bis).
	Legend:
	analysed data
	columns analysed manually
	categorization and interpretation of the data
	highlight of interesting data/quotes
	incomplete survey
	empty field

## Sheet: Q-CoFa Survey 1
	id. Response ID	submitdate. Date submitted	lastpage. Last page	startlanguage. Start language	seed. Seed	q0a. I have read the study information and agree with this process.	q0b. Do you agree that your data will be anonymously published?	q1a. What is your core facility specialized in?	q1a[other]. What is your core facility specialized in? [Other]	q1b. Does your core facility provide a full service, i.e. running studies for your customers?	q1c. Does it provide the infrastructure and methods for the users to work here?	q1d. What amount of data is produced per month?	q1d[comment]. What amount of data is produced per month? [Comment]	q1e. How many employees do you have?	q1f. How many users are coming to your core facility per month?	q2a. How are you communicating with your users?	q2b. Would you like to have the communication with your users improved?	q2bi. How?	q2c. Are you using a communication software?	q2ci. Which software are you using for communicating with your users?	q2ci[other]. Which software are you using for communicating with your users? [Other]	q2cii. What is your experience?	q2ciii. Do you think it would make sense to use a communication platform?	q2civ. Would you see obstacles?	q3a. Do you train your users about experimental techniques used in your facility?	q3a[comment]. Do you train your users about experimental techniques used in your facility? [Comment]	q3ai. What is the most important aspect of your training?	q3b. How important do you consider training?	q4a. Are you involved in experimental design?	q4ai. Why are you not involved?	q4aii. Would it be important for you to be involved?	q4aiii. How do you provide it?	q4aiv. How do you get involved?	q5a. Do you provide information to the user on sample preparation?	q5ai. Would that be important for you to provide?	q5b. Do you know what controls the user includes?	q5c. Do you know how the user prepares the samples?	q5d. If you are aware of poor sample quality do you allow the user to proceed?	q6a. Do you provide written standard experimental protocols?	q6b. Do you provide guidance how to increase quality and robustness of research outcome?	q6c. Do you help the users troubleshoot?	q6ci. Do you think this would be important?	q6d[q6d1][1]. Please rate the current situation and the importance to implement the feature. 1 = strongly agree 2 = somewhat agree 3 = neither agree nor disagree 4 = somewhat disagree 5 = strongly disagree [Samples are randomized.][Scale 1]	q6d[q6d1][2]. Please rate the current situation and the importance to implement the feature. 1 = strongly agree 2 = somewhat agree 3 = neither agree nor disagree 4 = somewhat disagree 5 = strongly disagree [Samples are randomized.][Scale 2]	q6d[q6d2][1]. Please rate the current situation and the importance to implement the feature. 1 = strongly agree 2 = somewhat agree 3 = neither agree nor disagree 4 = somewhat disagree 5 = strongly disagree [Samples/experiments are replicated.][Scale 1]	q6d[q6d2][2]. Please rate the current situation and the importance to implement the feature. 1 = strongly agree 2 = somewhat agree 3 = neither agree nor disagree 4 = somewhat disagree 5 = strongly disagree [Samples/experiments are replicated.][Scale 2]	q6d[q6d3][1]. Please rate the current situation and the importance to implement the feature. 1 = strongly agree 2 = somewhat agree 3 = neither agree nor disagree 4 = somewhat disagree 5 = strongly disagree [Experiments are performed blinded.][Scale 1]	q6d[q6d3][2]. Please rate the current situation and the importance to implement the feature. 1 = strongly agree 2 = somewhat agree 3 = neither agree nor disagree 4 = somewhat disagree 5 = strongly disagree [Experiments are performed blinded.][Scale 2]	q7a. Who saves the raw data?
1	6	1980-01-01 00:00:00	11	en	974993653	yes	Yes	crystallography		Yes	Yes	1-1000 MB		1-4	40	email, website, phone, meetings	No		No				No	Discussing a project requires many different documents provided by the users	Yes			moderately important	Yes, we are actively involved		N/A		project discussion with user	Yes	N/A	always	always	No	No	Yes	Yes	N/A	5	5	3	3	5	5	Core Facility (CF); Users have to save data that is important for them
2	8	1980-01-01 00:00:00	11	en	1378646409	yes	Yes	microscopy		Yes	Yes	1-1000 TB		1-4	3-5	In person (English)	No		No				No		Yes			moderately important	Yes, we provide information		N/A			Yes	N/A	rarely	often	No	No	Yes	Yes	N/A	1	1	1	1	1	1	Our facility does.
3	9	1980-01-01 00:00:00	11	en	290453393	yes	Yes	Other	Biophysics	Yes	Yes	1-1000 MB	The data we generate does not require a lot of space since most of the files are tab -delimited text files.	1-4	20	Email, in person	No		No				Yes	Moderation of threads.	Yes	For most of our instruments we train our users since we do not have the staff necessary to provide services on a large scale. Only a few (complicated) experiments are done on a service basis.	- How to use the instrument; also, so users do not cause damage - How to set up an experiment, incl. what controls are needed - Data analysis	very important	Yes, we provide information		N/A	In personal meetings. This is not necessarily done for all experiments.		Yes	N/A	sometimes	sometimes	No	Yes	Yes	Yes	N/A	5	3	1	1	5	3	Users
4	10	1980-01-01 00:00:00	11	en	1235743373	yes	Yes	Other	pluripotent stem cells	Yes	Yes	< 1MB		1-4	10	Email, Meetings, Skype, phone, Booking System	No		No				No		Yes			important	Yes, we are actively involved		N/A		We usually do the planning ourself (full-service).	Yes	N/A	always	often	Yes	Yes	Yes	Yes	N/A	5	5	2	1	5	5	Facility
5	11	1980-01-01 00:00:00	11	en	2026422996	yes	Yes	microscopy		Yes	Yes	I don’t know	The GB range is missing. I would have selected that.	1-4	20	Via sound waves and emails	No		No				No		Yes		Theoretical background and proper use of techniques.	very important	Yes, we provide information		N/A	Via sound waves.		Yes	N/A	often	often	Yes	Yes	Yes	Yes	N/A	3	2	2	1	2	2	Both the users and us.
6	14	1980-01-01 00:00:00	11	en	1504654463	yes	Yes	proteomics		Yes	Yes	1-1000 TB		1-4	10	E-Mail, Phone	No		No				Yes	The implementation might be a hurdle	Yes		Data analysis	very important	Yes, we are actively involved		N/A		If possible we meet the users before they start doing any experiment.	Yes	N/A	always	always	No	Yes	Yes	Yes	N/A	2	2	1	1	3	3	We save it on duplicated NAS systems . Additioanlly user data are stored at QBIC (Quantitative biology center Tübingen).
7	16	1980-01-01 00:00:00	11	en	638332105	yes	Yes	Other	transgenic technology	No	Yes	I don’t know	Not applicable!!!	1-4	3	e-mail, website, phone, animal database and most preferably direct meetings	No		No				Yes		Yes	but rarely. Only for specific techniques for analysis of mouse preimplantation embryos.	Precision, motivation and patience	very important	Yes, we provide information		N/A			Yes	N/A	sometimes	always	No	Yes	Yes	Yes	N/A	5	5	1	1	5	5	Facility and users
8	17	1980-01-01 00:00:00	11	en	1374688652	yes	Yes	Other	Data management/Bioinformatics	Yes	Yes	1-1000 TB		>16	10	Zendesk	No		Yes	Other	Zendesk	perfect	N/A		Yes		Understanding each other	very important	Yes, we are actively involved		N/A		We don't do projects without being involved	Yes	N/A	sometimes	often	No	Yes	Yes	Yes	N/A	3	5	3	5	3	5	We
9	18	1980-01-01 00:00:00	11	en	1207479008	yes	Yes	microscopy		No	Yes	1-1000 TB		1-4	70	Web forms e-mails	No		Yes	Other	web forms / PPMS	communication with users ok, more effort in communications with PIs	N/A		Yes		specific training for each application, each microscope	very important	Yes, we provide information		N/A	1 to 1 talks		Yes	N/A	sometimes	sometimes	No	Yes	Yes	Yes	N/A	1	3	4	5	1	3	users
10	19	1980-01-01 00:00:00	11	en	1719153545	yes	Yes	Other	preclinical In vivo imaging (MRI, CT, multi-photon, PET)	Yes	Yes	1-1000 TB		1-4	60	website, newsletters, workshop and seminars	No		No				Yes	find the budget to hire dedicated person for communication	Yes		knowledge of the system	very important	Yes, we provide information		N/A	initial discussion before and during trainings		Yes	N/A	often	often	Yes	Yes	Yes	Yes	N/A	3	1	1	1	3	2	users
11	20	1980-01-01 00:00:00	11	en	1380209230	yes	Yes	microscopy		No	Yes	1-1000 TB		1-4	58	bi-annual newsletter, email list per instrument, annual user meeting, incidents are reported on our reservation system (PPMS)	No		Yes	Other	PPMS	communication is very important	N/A		Yes		instrument training	very important	Yes, we provide information		N/A	discussion, protocols on our website		Yes	N/A	sometimes	often	Yes	Yes	No	Yes	N/A	3	4	4	4	2	2	the user
12	22	1980-01-01 00:00:00	11	en	2126284924	yes	Yes	Other	lipidomics	Yes	Yes	1-1000 MB	This depends on the acquisition modes - we perform more targeted then untargeted analysis and thus the data size is much lower but the number of projects is fairly significant	5-8	10 on average	By mail, by phone and through "in vivo" discussions. Discussions constitute the preferred way of communication in order to understand the biological question, make sure that the experiemnt has been designed properly and suggest the best approach and/or analysis type to produce the most useful data (to answer the question).	Yes	It can always be improved but I believe this is rather a personal issue. We should make an effort to educate researchers on the best practices while designing their experiments and collecting and storingtheir samples for metabolomic analysis.	No				Yes	Communication is indeed very important and I would say it relies exclusively on exchange of information and how much each person involved cares about the outcome.	No	We don't have open-access instrumentation. Users need to have the general idea on how we proceed with teh measurement but they don't need to know about the principle of instrument function. They simply need to understand the workflow (from sample preparation through data acquisition and to data processing and analysis).		moderately important	Yes, we are actively involved		N/A		Through the discussion with our users, in person.	Yes	N/A	always	always	No	Yes	Yes	Yes	N/A	1	1	1	1	3	3	We do it as a platform
13	23	1980-01-01 00:00:00	11	en	826254165	yes	Yes	flow cytometry		No	Yes	1-1000 TB	200GB	1-4	150	e-mail, website, twitter	Yes	So I know that they are reading the information not just receiving	No				Yes	Maybe a good thing but still depends on the users being engaged to read	Yes		Ensuring they know when to ask questions.	very important	Yes, we provide information		N/A	We vary our approach depending on the user's requirements. Some choose to make the most of our expertise but others prefer to choose other routes. We cannot force researchers to listen.		Yes	N/A	often	sometimes	Yes	No	Yes	Yes	N/A	3	2	2	1	3	3	The user is responsible for backing up their own data but we do pay to keep a 2 year backup.
14	24	1980-01-01 00:00:00	11	en	1273388862	yes	Yes	Other	Chemical Biology	Yes	No	1-1000 MB		9-12	1-2	personal meetings email, phone presentations	No		No				No	we have a standardised reporting process usually with powerpoint and excel table outputs. Any platform needs to be operating system independent	Yes	We do limited training in specialised workshops/courses once per year	New and up and coming techniques in drug discovery and validation	slightly important	Yes, we are actively involved		N/A		We provide expertise in design of assays before they are transferred to us. We then do the whole work independently and report the outcome to the users.	Yes	N/A	often	always	No	No	Yes	Yes	N/A	4	4	1	1	5	5	We save all the data
15	25	1980-01-01 00:00:00	11	en	472111929	yes	Yes	Other	histology	Yes	Yes	1-1000 TB		5-8	125	e mail, website, visual display, brochures, personal interaction, facebook	Yes	more regular outreach	No				Yes	time resource	Yes		technical competence to use equipment	very important	Yes, we are actively involved		N/A		verbal and written guidance, SOP's	Yes	N/A	always	often	Yes	Yes	Yes	Yes	N/A	3	1	3	1	3	1	users
16	27	1980-01-01 00:00:00	11	en	1733851933	yes	Yes	genomics		Yes	Yes	1-1000 TB		5-8	50	emails mainly	Yes		No				Yes	It should be fully searchable, and exportable in standard fomat.	Yes			very important	Yes, we provide information		N/A			Yes	N/A	often	often	Yes	Yes	Yes	Yes	N/A	3	4	1	1	5	4	Our core members.
17	28	1980-01-01 00:00:00	11	en	1535614309	yes	Yes	cell culture		No	Yes	I don’t know		1-4	100-120	Facility Induction tours, facility handbooks, user group meetings, emails, in person	No		No				No		No			very important	No	Experimental design is group leaders responsibility	No			No	No	never	sometimes	No	Yes	No	Yes	N/A	3	3	3	3	3	3	Researchers
18	30	1980-01-01 00:00:00	11	en	2003745750	yes	Yes	genomics		No	No	1-1000 TB		1-4	20	E-mail, messaging via iLabs, Telephone, face-to-face	Yes	Better overview of e-mails	No				Yes		Yes	No bio-informatic support, please note this is reflected in questions 2 and 3 at the beginning.	That the users understand why they are doing certain steps and how they work.	important	Yes, we provide information		N/A	meeting face to face and discussion about aims of the users project		Yes	N/A	sometimes	often	No	No	Yes	Yes	N/A	5	5	1	1	5	5	user we store for two months
19	34		7	en	187591378	yes	Yes	mouse		No	Yes	I don’t know		1-4	30	personally	Yes		No				Yes		Yes		how to use our eqipment	very important	Yes, we provide information		N/A	training		No	No	often	often	No	Yes	No	Yes	N/A	3	1	3	1	3	1
20	35		7	en	1392454204	yes	Yes	Other	Behavioural Analysis	Yes	Yes	I don’t know		5-8	3-5	Through the core facility website and also by email	No		No				No	Yes, because we work with live animals and this is sensitive subject	Yes		Compliance with animal testing regulations and ethics	very important	Yes, we are actively involved		N/A		From the genesis of the project to its finality	Yes	N/A	often	always	No	Yes	Yes	Yes	N/A	1	1	1	1	3	3
21	37	1980-01-01 00:00:00	11	en	1701569037	yes	Yes	mouse		Yes	No	1-1000 MB		1-4	40	Mail, Phone, Meeting	No		No				Yes		Yes			important	Yes, we are actively involved		N/A		Construct design, background of mice, technology	Yes	N/A	sometimes	always	No	Yes	Yes	Yes	N/A	2	2	1	1	2	2	The facility
22	38	1980-01-01 00:00:00	11	en	501354842	yes	Yes	protein expression		Yes	No	1-1000 MB		5-8	15	By email, by phone, by face-to-face meeting.	Yes	Software for project progression.	No				Yes		No			important	Yes, we are actively involved		N/A		By project management, start project, experimental design, report, invoicing.	Yes	N/A	sometimes	sometimes	No	Yes	Yes	Yes	N/A	5	5	2	1	5	5	The Core Facility.
23	39	1980-01-01 00:00:00	11	en	1205745225	yes	Yes	genomics		Yes	Yes	1-1000 TB		1-4	5	Email, Twitter	Yes	Intranet page, local forum	No				Yes	Don't understand it	Yes	Occasional PhD students in techniques e.g. Real-time PCR, NGS library prep.	Making the student confident in their ongoing work, using the insturments correctly	very important	Yes, we provide information		N/A	Face to face discussion and email		Yes	N/A	rarely	sometimes	Yes	No	No	Yes	N/A	1	1	1	1	1	1	We save for a short time but it transfers to the user
24	40	1980-01-01 00:00:00	11	en	759556042	yes	Yes	Other	bioinformatics	No	Yes	1-1000 TB		1-4	3	E-mail, weekly meetings, github	No		No				No		Yes		Sufficient amount of time has to be dedicated for training. Users should ideally be trained on their own data.	very important	Yes, we provide information		N/A	We would like to be involved. Unfortunately in 95% of cases data will be produced without our consultation.		Yes	N/A	often	often	Yes	Yes	Yes	Yes	N/A	5	1	4	1	3	3	The user
25	41	1980-01-01 00:00:00	11	en	857430646	yes	Yes	genomics		No	Yes	I don’t know		1-4	100	email, opening hours, scheduled meeting	Yes	website, regular updates, seminars	Yes	Other	Parkour		N/A		Yes	hands on courses		important	Yes, we provide information		N/A	meetings		Yes	N/A	sometimes	sometimes	Yes	NA	Yes	Yes	N/A	3	1	3	1	3	1	Bioinformatic unit
26	42	1980-01-01 00:00:00	11	en	413720981	yes	Yes	proteomics		Yes	No	1-1000 TB		1-4	30	personell discussion before and after sample submission	Yes	Discussions are time consuming. More experienced persons in the Core facility are needed.	Yes	Other	iLab Agilent	It is ok for management of samples and data. It does not replace discussions.	N/A		Yes		Users should know the basic principles of the technique and learn how results look like, how to deal with them, which software packs are available for that and how to work with them.	very important	Yes, we are actively involved		N/A		User tell what they want to analyze and what they expect from the core facility. We tell, how we would analyze the samples and what are preferred methods to do the experiments to end up with samples compatible with the methods of the core facility.	Yes	N/A	always	often	Yes	Yes	Yes	Yes	N/A	4	3	1	1	3	3	university computing center
27	43	1980-01-01 00:00:00	11	en	1055071720	yes	Yes	metabolomics		No	Yes	1-1000 TB		1-4	10-20	face2face, personal email, intranet page, automatic emails from sample tracking system	Yes	More users should ask for help/feedback/advice before/during experiments rather than be unhappy with data afterwards. More users should read the manuals that we provide	No				No	It's difficult to get users to use yet another communication channel. Email works quite well for us. I see that new ways of lab communication like slack are adopted very slowly. Anything where users would have to look or actively access is an obstacle	Yes		Consult about adapting standard sample prep protocols to specific needs, use of data analysis software	very important	Yes, we provide information		N/A	I very much like it when users ask about advice on experimental design. Usually in a face2face meeting or by email. Not all users chose to do so.		Yes	N/A	sometimes	often	Yes	Yes	Yes	Yes	N/A	1	2	3	2	3	4	We in the facility save the raw data for 1 to 2 years depending on the measuring platform and then delete it. Users can keep it longer if they want to
28	44	1980-01-01 00:00:00	11	en	1943721209	yes	Yes	metabolomics		Yes	No	1-1000 MB		5-8	12	Via email or online booking system or personal meetings.	No		Yes	Other	iLab	Works very well for our needs	N/A		No			slightly important	Yes, we provide information		N/A	Personal project discussions		Yes	N/A	often	often	No	Yes	Yes	Yes	N/A	5	5	3	1	3	3	Core staff
29	45	1980-01-01 00:00:00	11	en	2049988380	yes	Yes	Other	CRISPR	Yes	Yes	1-1000 MB		>16	35	email face-to-face	Yes	simple project management software - eg MS Teams with Planner and OneNote	Yes	Other	email	7 year postdoc 5 years core facility head (N = 18 people) 1 year interim core facility head (N = 30 people) Journal Editor - The CRISPR Journal	N/A		Yes	We have a different service for PhD vs other users. PhD are strongly encouraged to do the relationship is more teacher-student. The other interactions are more collaborative.	face time	important	Yes, we are actively involved		N/A		In some cases we design the entire experiment (about 20%) In other cases it's more of a collaborative relationship (about 55%) In others it's more of a pure service role (approx 25%)	Yes	N/A	always	always	No	NA	Yes	Yes	N/A	4	4	1	1	5	5	Both User and Core
30	46	1980-01-01 00:00:00	11	en	1025038653	yes	Yes	metabolomics		Yes	Yes	1-1000 TB		1-4	up to 10	Email & personal communication	No		No				No	Does not provide benefits & costs time/money	No			very important	Yes, we provide information		N/A	Email		Yes	N/A	often	often	No	Yes	Yes	Yes	N/A	3	3	1	3	1	5	the facility
31	47	1980-01-01 00:00:00	11	en	1130097072	yes	Yes	mouse		No	No	1-1000 MB		1-4	35	Mail, Database	No		No				Yes	No	Yes		Training for other facilities	moderately important	Yes, we are actively involved		N/A		Mail, Phone	Yes	N/A	rarely	sometimes	No	Yes	Yes	Yes	N/A	1	1	1	1	1	1	Researcher
32	49	1980-01-01 00:00:00	11	en	1467642304	yes	Yes	genomics		Yes	Yes	1-1000 TB		5-8	35	consulting or E-Mails	Yes		Yes	Other	ilab		N/A		Yes			important	Yes, we are actively involved		N/A			Yes	N/A	always	always	No	Yes	Yes	Yes	N/A	5	5	5	5	3	3	core unit
33	50	1980-01-01 00:00:00	11	en	825356084	yes	Yes	flow cytometry		Yes	Yes	1-1000 TB		1-4	61	via email, phone, our booking platform	No		No				No	our students/researchers are overloaded with information, newsletters, social media, other communication channels...	Yes		how the instrument(s) actually operate (important for troubleshooting)	important	Yes, we are actively involved		N/A		if the users allow us to, we give recommendations on their experimental controls and panel design (suggest to shift fluorophores for example);	Yes	N/A	sometimes	sometimes	No	Yes	Yes	Yes	N/A	4	3	2	1	5	2	the user; we provide a back-up until the respective people leave the institute
34	51	1980-01-01 00:00:00	11	en	839378544	yes	Yes	Other	mouse, rat, zebrafish behavior	No	Yes	1-1000 TB	Most data are video recordings of animals	1-4	4-10	Mainly email, and in person meetings	Yes	More feedback of users which is kind of lacking	No				Yes	implementation by our IT department	Yes		Making sure they know what to do and how to do it, following the rules of the facility	very important	Yes, we are actively involved		N/A		Advise on what tests to use and animal numbers	Yes	N/A	often	often	Yes	Yes	Yes	Yes	N/A	2	1	3	1	2	1	The user, most programs we use automatically do this
35	52	1980-01-01 00:00:00	11	en	458765405	yes	Yes	proteomics		Yes	Yes	1-1000 TB		1-4	20	Home made LIMS system. Meeting in person.	No		Yes	Other	home made web interface based LIMS		N/A		Yes	only a very selected number of power users (one person per year)	Experimental design, sample preparation and data analysis	moderately important	Yes, we are actively involved		N/A		Project lacking appropriate experimental design are not conducted.	Yes	N/A	always	always	No	NA	Yes	Yes	N/A	3	2	2	1	5	4	The facility.
36	53	1980-01-01 00:00:00	11	en	531076375	yes	Yes	Other	flow cytometry and mass cytometry	No	No	1-1000 TB	raw data from mass cytometry flow cytometry only would be < 300 GB/month	1-4	20-30	email personally phone openIris scheduler	No		No				No	Users are overwhelmed with the different means of communication. We have a strict rule that people using the core facility have to read their email for information. Also the scheduling software uses email to "communicate". We do not communicate via private means (mobile phone, whats app, etc.). To add an additional means of communication would not be more efficient.	Yes	We do not have lab space for experiments. We only train for technology and use of instruments, not for sample preparation (unfortunately).	All users should get a basic understanding of the technology. To make sure the user feels comfortable with the technology/the instrument. To make sure the user is able to use the QM procedures correctly and understands them and will notice, if the instrument is not in a state to measure samples. We want to support the users in producing reproducible, good quality data.	very important	Yes, we are actively involved		N/A		We have a project meeting for every user and we get involved if a user has a special application and needs advice. This is mainly for mass cytometry and imaging mass cytometry.	Yes	N/A	sometimes	often	Yes	No	Yes	Yes	N/A	3	3	2	1	4	3	The users are responsible for their data. The CF saves the data for the cell sorter with backup. The CF saves the data for the user on HD for the mass cytometer.
37	55	1980-01-01 00:00:00	11	en	1441445922	yes	Yes	proteomics		Yes	Yes	1-1000 TB		5-8	15	Via email and Skype mostly, sometimes via telephone.	Yes	More streamlined, ticketing system, less pressure to answer immediately.	Yes	Other	YouTrack software with home-made website built on top of it	Communication is almost a full-time job. It falls apart in 2 different aspects: practical/organization issues and scientific/expert advice. Ideally those can be covered by different people or teams. The expert advice takes most time and is basically a consultancy job. Myself and many core facilities manager colleagues have to care of both types of communication which makes the job rather heavy. I…	N/A		Yes	We currently train users ad hoc. We hope to setup a training program soon, to group trainees and consume time more efficiently.	Software-based analysis of proteomics data so users can perform their own statistical tests and generate their own figures.	important	Yes, we are actively involved		N/A		Most researchers have no idea how to setup their experiment, often because they are lacking the expert knowledge about our technology (proteomics). Hence, they cannot judge what to expect, how many replicates should be included, if multiplexing is appropriate, etc... Experimental design is almost exclusively our task, of course in close consultation with the user.	Yes	N/A	often	often	Yes	Yes	Yes	Yes	N/A	3	2	2	2	4	5	We save the raw mass spectrometry data. Upon publication the raw data files are uploaded in a public repository, mostly the PRIDE database hosted by EBI in our case.
38	58	1980-01-01 00:00:00	11	en	267612537	yes	Yes	microscopy		No	Yes	1-1000 TB		1-4	140/ active users per month (November 2019) , total number of users - cca 240/ per year	First time user can always approach us in person and via email. We send first time users the link to new user project questions - asking user to describe their project, then a) general personal introductory session is scheduled for small group of new users - once a wee - to talk about how to use the Light Microscopy Facility ( LMF), user guidelines, administration and safety aspects , LMF staff m…	Yes	I feel that we could have better documented the follow-up regarding the user projects, yet there is also issue of the capacity of the LMF staff - with 4 staff members we have to process 240 users per year many of them with multiple requests. While we feel that we are quite good at the initial phase with users to get them started in our LMF, we feel that time for follow-up is rather limited and th…	No				Yes	In case that we move to communication platform - we have to make sure that this is SINGLE ENTRY POINT EASY TO USE for users and LMF staff and for all services and facilities in the institute. Users should not be forced to communicate with different services and facilities using different communication tools. Yet , in case that there is one communication platform - it still must reflect the needs …	Yes		To make sure that users become independent in using the techniques which we offer.	very important	Yes, we are actively involved		N/A		As already described, we provide new users with the the link to our new user project questions, we discuss the project with user then individual on one to one basis and based on the user project questions and one to one meeting with user we make a plan about which instruments will be used to acquire data - and we also talk about how the experiment should be design so it meets the needs of the use…	Yes	N/A	rarely	sometimes	No	No	Yes	Yes	N/A	4	2	1	1	5	2	User saves their raw data themselves.
39	59	1980-01-01 00:00:00	11	en	1073228128	yes	Yes	proteomics		Yes	No	1-1000 TB		1-4	5-15	Facility email address, open office hours, walk-up lab access	Yes	- automated progress tracking and reporting for users after log-in - automated invoicing	No				Yes	Faculty is too slow to purchase one.	Yes	Seminars, methods courses, training on projects	Project success: only successfuly users are promoters	very important	Yes, we are actively involved		N/A		Madatory up-front project discussions for all new projects	Yes	N/A	always	always	No	Yes	Yes	Yes	N/A	3	3	1	1	3	3	The core facility.
40	60	1980-01-01 00:00:00	11	en	1016054236	yes	Yes	proteomics		Yes	No	1-1000 TB	Thare is a gap in your list of choices from 1 GB to 1 TB	5-8	10-15	e-mail or in person (phone, less frequently)	Yes	writing emails is good because the information remains recorded, but takes a lot of time	No				Yes	It depends , I have no idea what you mean with " communication platform"	Yes	only theoretical training	Make them understand the possibilities/limitations and the nature of the data generated	important	Yes, we are actively involved		N/A		In depth discussions, ideally before experiments start.	Yes	N/A	often	often	No	Yes	Yes	Yes	N/A	3	2	3	1	4	3	We do
41	63	1980-01-01 00:00:00	11	en	726072845	yes	Yes	microscopy		No	Yes	1-1000 TB	1-1000 GB is unfortunately missing	1-4	60	mostly e-mail and in person	No		No				No		Yes		Enable them to use the microscopes such that they get good data, without damaging the hardware.	very important	Yes, we provide information		N/A	we talk to people		Yes	N/A	sometimes	sometimes	Yes	No	Yes	Yes	N/A	3	3	3	3	3	3	the user
42	64	1980-01-01 00:00:00	11	en	151968887	yes	Yes	Other	pluripotent stem cells	No	Yes	1-1000 MB	several GB	5-8	20	Phone email meetings	No		No				No		Yes		the users should be able to work with pluripotent stem cells by themthelfs	very important	Yes, we are actively involved		N/A		meetings, discussion, project supervision, collaboration	Yes	N/A	sometimes	often	No	Yes	Yes	Yes	N/A	3	3	3	3	3	3	the facility and the user, but this is largely irrelevant for my facility
43	67	1980-01-01 00:00:00	11	en	1397264050	yes	Yes	Other	preclinical pharmacology	Yes	Yes	I don’t know		>16	This is variable, let say between 20 and 30.	Email	No		No				No	I do not see obstacles but the fact is that there is presently no need for a true communication platform	No	Exceptionally some user (i.e. our customers) asked us for training. Nevertheless, this is not something we plan to generalize as by definition our business is to perform experiment for our customers/users.		unimportant	Yes, we are actively involved		N/A		We prepare the study plans and they are approved by us and by our customers/users.	Yes	N/A	sometimes	sometimes	No	Yes	Yes	Yes	N/A	3	2	3	1	3	1	We perform experiment for our clients/users. We save the data we produce.
44	68		7	en	341880777	yes	Yes	flow cytometry		Yes	No	1-1000 MB		1-4	20 +	E-Mail, phone, Messenger service such as Whattsapp, in person	No		No				Yes		Yes		That users know their experiment and what they want to analyse and therefore choosing the right controls, colors and protocols. In the practical training I want that the user understands what he/she does and why, e.g. choosing the right voltages, understanding compensation.	very important	Yes, we are actively involved		N/A		We are not involved in all user experiments but if our help is needed, we provide cell isolation protocols, staining protocols, support with panel design	Yes	N/A	often	often	No	Yes	Yes	Yes	N/A	2	3	3	2	3	2	Depending Analyzer every user saves their own raw data Sorter I save the raw data and provide it for the user Databackup of raw data is done for analyzer and sorter on a regular base by Core Facility
45	71	1980-01-01 00:00:00	11	en	28744371	yes	Yes	proteomics		Yes	No	1-1000 TB		9-12	50	email, informatics system	No		Yes	Other	Agendo	Good	N/A		Yes			important	Yes, we are actively involved		N/A		Previous meetings, goals clarification, research question statement	Yes	N/A	always	always	No	Yes	Yes	Yes	N/A	5	5	5	5	3	3	Institute
46	75	1980-01-01 00:00:00	11	en	359055758	yes	Yes	Other	Research Instrumentation and Cell Services	No	Yes	1-1000 TB		5-8	We have 380 users per year and usage varies, but on average ~32 / month	Helpdesk tickets, 1:1, email, seminars, user groups and a specialised Core Facility Management Software	Yes	To run a technology club to advertise to a wider audience any new technologies or equipment that comes into the Core	Yes	Other	Stratocore PPMS and Helpdesk	Helpdesk software is very useful for tracking user requests. PPMS software is useful for understanding user base for equipment, and communicating when equipment is booked or not available.	N/A		Yes	We train on Western blotting, cell culture technique and safe use of liquid nitrogen as formal training sessions. We also train ad-hoc on a 1:1 basis when users require	To ensure best practice is taken away from any training, and an understanding on how to generate good quality research data, pros/cons on performing experiments certain ways	very important	Yes, we provide information		N/A	1:1 sessions and workshops		Yes	N/A	sometimes	sometimes	No	Yes	Yes	Yes	N/A	3	3	2	1	3	3	the user
47	76	1980-01-01 00:00:00	11	en	383336714	yes	Yes	cell culture		Yes	Yes	1-1000 MB		1-4	12	personal communication, e-mail, intranet-site, labfolder (electronical notebook), bulletin board	No		Yes	Other	restyaboard	I am just starting doing to set it up myself. I have been invited to an other group using Trello. It is very usefull to organize workflows. In addition, we are using an electronical lab book which is shared within the group and users. The electronical lab book has improved the documentation and my people are better organized.	N/A		Yes		to teach aseptic cell culture and scientific practice including safety rules and most importantly insure quality control and characterization of the cell cultures and assays.	very important	Yes, we are actively involved		N/A		people ask for help by mail or get send to us by their supervisor	Yes	N/A	often	often	No	Yes	Yes	Yes	N/A	3	3	2	2	3	3	It's send to the user and also kept by the facility
48	77	1980-01-01 00:00:00	11	en	178729898	yes	Yes	microscopy		Yes	Yes	1-1000 TB		5-8	10	Personal interactions email	No		No				No		Yes		Sample preparation Imaging Data interpretation	very important	Yes, we are actively involved		N/A		We propose the experimental solutions, check the literature if necessary	Yes	N/A	often	often	No	Yes	Yes	Yes	N/A	4	5	4	5	4	5	The facility
49	78	1980-01-01 00:00:00	11	en	21431375	yes	Yes	Other	Histopathology	Yes	Yes	I don’t know		1-4	7	email, phone, personally	No		No				No		Yes		Handling of samples processing	very important	Yes, we provide information		N/A	in meetings, in writing		Yes	N/A	sometimes	sometimes	No	Yes	Yes	Yes	N/A	4	1	3	1	5	1	we
50	79	1980-01-01 00:00:00	11	en	911220290	yes	Yes	flow cytometry		No	Yes	1-1000 MB		1-4	30	email and online booking software	No		No				No	too many different options dont work for us, users don't read (e.g. please contact us via online scheduler) so they just send an email and ask what they have to do.	Yes		people should understand what they are doing, not just copy from established experiments from colleagues or CF staff	very important	Yes, we provide information		N/A	user meetings are mandatory before using the facility - we then discuss the experiment and give the minimum requirements for controls, setup, staining techniques etc		Yes	N/A	often	often	No	Yes	Yes	Yes	N/A	3	2	1	1	5	3	user and for a short time the facility
51	80	1980-01-01 00:00:00	11	en	1295844521	yes	Yes	genomics		Yes	Yes	1-1000 MB		1-4	10	email and personal contact	No		No				No		Yes		independency	important	Yes, we are actively involved		N/A			Yes	N/A	always	often	No	Yes	Yes	Yes	N/A	2	3	1	1	2	3	the user
52	82	1980-01-01 00:00:00	11	en	355457213	yes	Yes	Other	a multilevel support through cell phenotyping and molecular profiling	No	Yes	I don’t know		9-12	>100	through emails and annual user meetings	No		No				No		Yes			very important	Yes, we are actively involved		N/A			Yes	N/A	often	often	No	Yes	Yes	Yes	N/A	4	5	4	5	2	3	generaly the users, for sc mRNA the platform
53	83	1980-01-01 00:00:00	11	en	955249533	yes	Yes	mouse		Yes	Yes	I don’t know		>16	20-50, varies a lot as full service is provided (meaning user does not need to access the facility necessarily at all)	Interactive database (PyRAT), email, telephone, personally	Yes	One always wants better communication, although we are fairly happy with the way it works at the moment. The shortcomings are typically human (forgetfulness, cultural)	Yes	Other	PyRAT	Excellent, although PyRAT is not really communication software, but it handles work requests well	N/A		Yes		Interest to learn :-)	very important	Yes, we are actively involved		N/A		By meeting scientists when they plan their experiments, and being actively involved if experimental licences are needed (eg. animal welfare)	Yes	N/A	rarely	rarely	No	No	No	Yes	N/A	3	1	3	1	3	1	User and us. Basic experimental info exist in PyRAT, but after sampling (eg. what happens in user labs) the user is responsible.
54	86	1980-01-01 00:00:00	11	en	1405444096	yes	Yes	Other	Histology	Yes	Yes	I don’t know		1-4	50	Website and email	Yes		No				Yes		Yes		Training on equipments	very important	Yes, we provide information		N/A	During discussion		Yes	N/A	often	often	Yes	Yes	Yes	Yes	N/A	2	1	2	1	2	1	The researchers
55	87	1980-01-01 00:00:00	11	en	971445368	yes	Yes	Other	Histology	No	Yes	1-1000 TB		9-12	~60 users mostly using us as a service, some booking equipment	In order of frequency: Email/PPMS and face to face with highest frequency, we also have a user booklet, then twitter, yammer, seminars, inviting users to our retreats/weekly meeting to present on their projects. Starting up a user group meeting again in the new year - every 6 months to start with. The last one failed but that was over 3/4 years ago and was possibly too frequent. Our intranet is o…	Yes	As per the above future actions	Yes	MS-SharePoint		Sharepoint is new and not set up yet for our core to maximize use. To date PPMS and outlook has been the most used electronic communication system.	N/A		Yes	Mostly we give overviews, training for ordering our services or training on equipment/software we offer as bookable on PPMS	Most of the training we give is so that users can use the equipment/software themselves. There is a H&S aspect to this as well as a theoretical understanding and scientific quality aspect, which are all equally important but overall safety has to come first if pushed for the most important aspect in our core.	very important	Yes, we provide information		N/A	This very much depends on the user and the project. e.g. for Tissue Microarray building we are heavily involved in the design of the TMAs but for the most part in terms of the larger project we are not involved so actively. Users tend to come to us for advice but only on specific histology technical/logistical aspects.		Yes	N/A	sometimes	often	No	Yes	Yes	Yes	N/A	3	5	3	5	3	5	Images scanned on our scanners are saved automatically to dedicated servers. If users use our microscope, they save their raw data. Some user capture images themselves in their own labs from stained slides we have created. Image analysis data is saved on a dedicated server. External users sometimes have their images copied to a hard drive to take away but we also have software for sharing / annot…
56	88	1980-01-01 00:00:00	11	en	207977191	yes	Yes	microscopy		Yes	Yes	1-1000 TB		5-8	220, but this questions is not clear to answer (different users?) There are often users coming multiple times per month.	Directly face to face or via E-mail or in special workshop with specific topics	Yes	Users are not using directly online communication even if we have it on the desktop of all set-ups	Yes	MS-SharePoint		Users are not using directly online communication even if we have it on the desktop of all set-ups	N/A		Yes		Teaching handling instrument and recording properly. Iaging Ethics, also unbaised recording	very important	Yes, we are actively involved		N/A		Every new users gets a personal meeting with us discussing the project and what we consider the right instrument and experimantal design also some information about the proper statistics. If quantification is neded or wanted its a longer process. Also we do sometimes pilot experiments with the users.	Yes	N/A	often	always	Yes	Yes	Yes	Yes	N/A	5	1	4	1	5	2	users
57	90	1980-01-01 00:00:00	11	en	2014012560	yes	Yes	microscopy		Yes	Yes	1-1000 TB		1-4	15	email, in person, phone	No		No				No		Yes		getting best results, avoiding damage	very important	Yes, we provide information		N/A	meetings		Yes	N/A	sometimes	often	No	Yes	Yes	Yes	N/A	3	3	1	1	3	3	user
58	92	1980-01-01 00:00:00	11	en	137604888	yes	Yes	proteomics		No	No	1-1000 TB		1-4	10	General info: website Personal communication by email, phone	Yes	Better presentation of information on website (fees, procedures, offered services) Regular and better feedback during course of projects e.g. reaching of milestones. Trying to minimize „lost” unanswered emails	No				Yes	Additional platforms for single core facilities will not be accepted by users: too high investment in registration / installation. Combined platform for all facilities could be attractive. Optimized email communication is sufficient (e.g. with ticketing system).	Yes	No general training to all users but workshops offered that explain technique and laboratory-procedures	Explaining benefits and limitations of the technique	moderately important	Yes, we provide information		N/A	General warnings on website to consult with us early Personal discussions: refer to experts for design and analyses, describe best practices and problems of samples. Suggest controls and protocols for specific methods.		Yes	N/A	often	often	Yes	Yes	Yes	Yes	N/A	4	2	3	1	4	2	Our facility
59	93	1980-01-01 00:00:00	11	en	247729467	yes	Yes	flow cytometry		No	Yes	1-1000 MB		1-4	30	Phone, E-Mail, Homepage, Face-to-face, seminars	Yes	More seminars	No				Yes	Data protection, as hospital	Yes		Good and correct sample preparation	important	Yes, we are actively involved		N/A		we advise new users regarding the optimal dyes for the FACS instrument in question and the sample preparation If we already have experience or protocols, users can fall back on these	Yes	N/A	sometimes	rarely	Yes	No	Yes	Yes	N/A	3	3	3	2	5	4	The user and the facility (for some of the data)
60	94	1980-01-01 00:00:00	11	en	948198235	yes	Yes	flow cytometry		Yes	Yes	1-1000 TB		1-4	30	booking platform e-mail telephone	Yes	no e mail ping pong	No				Yes		Yes		learn how to use the maschines what flow cytometry is	very important	Yes, we are actively involved		N/A		meetings with the researchers	Yes	N/A	sometimes	sometimes	No	Yes	Yes	Yes	N/A	3	1	2	1	2	1	our users
	closed
[truncated: 42 more columns]

## Sheet: Q-CoFa survey 2
	id. Response ID	submitdate. Date submitted	lastpage. Last page	startlanguage. Start language	seed. Seed	q0a. I have read the study information and agree with this process.	q0b. Do you agree that the survey data will be published?	q1a. What is your core facility specialized in?	q1a[other]. What is your core facility specialized in? [Other]			q1b. Who performs the experiments at your core facility?	q1d. What amount of data is produced per month?	q1d[comment]. What amount of data is produced per month? [Comment]	q1e. How many employees do you have?	q1f. How many users are coming to your core facility per month?		q2a[q2a1]. How are you communicating with your users? [in person (face to face)]	q2a[q2a2]. How are you communicating with your users? [email]	q2a[q2a3]. How are you communicating with your users? [phone]	q2a[q2a4]. How are you communicating with your users? [website]	q2a[q2a5]. How are you communicating with your users? [social media]	q2a[q2a6]. How are you communicating with your users? [communication/management software]	q2a[q2a7]. How are you communicating with your users? [seminars/workshops]	q2a[q2a8]. How are you communicating with your users? [user group meeting]	q2a[other]. How are you communicating with your users? [Other]	q2b. Would you like to have the communication with your users improved?	q2bi. How?	q2c. Are you using a communication software?	q2ci. Which software are you using for communicating with your users?	q2cii. What is your experience?	q2ciii. Do you think it would make sense to use a communication platform?	q2civ. Would you see obstacles?	q3a. Do you train your users about experimental techniques used in your facility?	q3a[comment]. Do you train your users about experimental techniques used in your facility? [Comment]	q3ai. What is the most important aspect of your training?	q3b. How important do you consider training?	q4a. Are you involved in experimental design?	q4ai. Why are you not involved?	q4aii. Would it be important for you to be involved?		q4aiii[q4aiii1]. How do you provide it? [face to face discussion]	q4aiii[q4aiii2]. How do you provide it? [phone]	q4aiii[q4aiii3]. How do you provide it? [in writing (file or paper)]	q4aiii[q4aiii4]. How do you provide it? [email]	q4aiii[other]. How do you provide it? [Other]		q4aiv[4aiv1]. How do you get involved? [face to face discussion]	q4aiv[4aiv2]. How do you get involved? [phone]
61	1	1980-01-01 00:00:00	11	en	2143820328	yes	Yes	proteomics				The staff of the core facility does (the users don’t work at the core facility).	1-1000 TB	The amount of data produced depends on analyses perfromed. In cases when more imaging analyses is done, the amount of data surges.	1-4	1-20 users per month		Yes	Yes	Yes	No	No	No	Yes	No		Yes	Having a kind of a chat system along with project/sample administartion. Each users' project would have a chat possibility with archiving properties so that every step can be traced and attributed to a tagged project.	No			Yes	generally, no.	Yes		Sample preparation technique prior to sample submission.	very important	Yes, we provide information		N/A		Yes	No	Yes	Yes			N/A	N/A
62	3	1980-01-01 00:00:00	11	en	222956111	yes	Yes	microscopy				The users work at the core facility (you provide the infrastructure only).	1-1000 TB		1-4	41-60 users per month		Yes	Yes	Yes	No	No	No	No	No		No		No			Yes		Yes		Microscopy, Histology, Immunofluorescence and Sample Preparation	very important	Yes, we are actively involved		N/A		N/A	N/A	N/A	N/A			Yes	No
63	4	1980-01-01 00:00:00	11	en	1012909930	yes	Yes	microscopy				Both are possible.	1-1000 TB		13-16	81-100 users per month		Yes	Yes	Yes	Yes	No	No	Yes	No		Yes	dedicated management software	No			Yes	Yes for automated communication regarding system status, feedback. Individualized and fragmented software platforms for operating systems, active directories, management systems, etc. No for any other type of communication like general communication.	Yes		Project related scientific and technical training to use complex instrumentation for data generation. How to use the generated data properley. Raising awareness for correct, optimal sample preparation, limitations of the technique, alternatives as well as downstream analysis of the data (which may be outside the scope of the actual training).	very important	Yes, we provide information		N/A		Yes	No	No	No			N/A	N/A
64	5		6	en	1735260339	yes	Yes	genomics				The staff of the core facility does (the users don’t work at the core facility).	1-1000 TB		5-8	1-20 users per month		Yes	Yes	Yes	No	No	No	Yes	No		No		No			No	Higher workload to manage additional communication platform.	No			moderately important	Yes, we provide information		N/A		Yes	Yes	Yes	Yes			N/A	N/A
65	6	1980-01-01 00:00:00	11	en	1207243065	yes	Yes	protein expression				The staff of the core facility does (the users don’t work at the core facility).	1-1000 MB		1-4	1-20 users per month		Yes	Yes	Yes	No	No	No	Yes	No	OpenIRIS access	Yes	tool that combines project management, ELN, invoicing, user communication	No			Yes	IP related Content (patent-related stuff)	Yes		How to use equipment correctly, store and evaluate data. Understand limits of applied method.	very important	Yes, we are actively involved		N/A		N/A	N/A	N/A	N/A			Yes	Yes
66	7		10	en	1157135079	yes	Yes	Other	in vivo bioluminescense/ fluorescense in small animal			The staff of the core facility does (the users don’t work at the core facility).	< 1MB		1-4	1-20 users per month		Yes	Yes	Yes	No	Yes	No	No	Yes		No		No			No		Yes		highest Quality of processing techniques	important	Yes, we provide information		N/A		Yes	Yes	Yes	Yes			N/A	N/A
67	9	1980-01-01 00:00:00	11	en	1644350552	yes	Yes	Other	Several of the above			Both are possible.	1-1000 GB	Rough Estimate	>16	21-40 users per month		Yes	Yes	Yes	Yes	No	No	Yes	Yes		No		No			No	Already to much information via usual channels (Email etc etc)	Yes		Proficiency in data aquisition and quality control	very important	Yes, we are actively involved		N/A		N/A	N/A	N/A	N/A			Yes	Yes
68	13		10	en	479056461	yes	Yes	mouse				The staff of the core facility does (the users don’t work at the core facility).	I don’t know		1-4	1-20 users per month		Yes	Yes	Yes	No	No	No	No	No		No		No			No		Yes	Whoever is interested is welcome and I give seminars for interested scientists and inform regularly about new developments	to make clear that animals are no Eppendorf tubes, make people understand what the principle of the techniques is and how they have mate their founders and take care of them	very important	Yes, we are actively involved		N/A		N/A	N/A	N/A	N/A			Yes	Yes
69	14		10	en	1025168495	yes	Yes	microscopy				Both are possible.	1-1000 TB		>16	> 100 users per month		Yes	No	No	Yes	No	No	No	Yes		Yes		No			Yes		Yes			very important	Yes, we provide information		N/A		Yes	No	No	No			N/A	N/A
70	16	1980-01-01 00:00:00	11	en	903613840	yes	Yes	microscopy				The staff of the core facility does (the users don’t work at the core facility).	1-1000 GB		1-4	21-40 users per month		Yes	Yes	Yes	No	No	Yes	Yes	Yes		No		Yes	Open Iris		N/A		Yes		Good transmission of knowledge	very important	Yes, we are actively involved		N/A		N/A	N/A	N/A	N/A			Yes	Yes
71	17	1980-01-01 00:00:00	11	en	1611282046	yes	Yes	flow cytometry				Both are possible.	1-1000 GB		1-4	21-40 users per month		Yes	Yes	Yes	No	No	No	No	No		No		No			No		Yes		That the users really understand the technique and thus know what they are doing and why.	very important	Yes, we are actively involved		N/A		N/A	N/A	N/A	N/A			Yes	Yes
72	18	1980-01-01 00:00:00	11	en	2110905361	yes	Yes	microscopy				Both are possible.	1-1000 TB		1-4	81-100 users per month		Yes	Yes	Yes	Yes	No	No	Yes	Yes		No		No			Yes	user and instrument group platforms, probably including new media may be the future, but is hard to realize in an academic environment with all the GDPR regulations Universities are confronted with	Yes		applicability and functional possibilities	very important	Yes, we provide information		N/A		Yes	No	No	No			N/A	N/A
73	19		7	en	1680781582	yes	Yes	genomics				Both are possible.	1-1000 GB		1-4	1-20 users per month		Yes	Yes	Yes	No	No	Yes	Yes	Yes		No		No			Yes	We established a electronic notebook, where we also can share information. It would be great if communication and booking could be within that system. Otherwise one has to many different programs.	Yes		That they understand the principles and the pitfalls.	very important	Yes, we are actively involved		N/A		N/A	N/A	N/A	N/A			Yes	Yes
74	21	1980-01-01 00:00:00	11	en	1130562449	yes	Yes	genomics				Both are possible.	< 1MB		1-4	1-20 users per month		Yes	Yes	Yes	No	No	No	No	No		No		No			No		Yes		We are training students to be able to carry out CRISPR experiments	very important	Yes, we are actively involved		N/A		N/A	N/A	N/A	N/A			Yes	No
75	23		7	en	1632167094	yes	Yes	genomics				Both are possible.	1-1000 TB		5-8	> 100 users per month		Yes	Yes	Yes	Yes	No	No	No	Yes		No		No			Yes		Yes		minimise bad use of facility equipment	moderately important	Yes, we provide information		N/A		Yes	Yes	Yes	Yes			N/A	N/A
76	26	1980-01-01 00:00:00	11	en	1539655796	yes	Yes	Other	Chemical Biology			The staff of the core facility does (the users don’t work at the core facility).	1-1000 MB		9-12	1-20 users per month		Yes	Yes	Yes	No	No	No	No	Yes		No		No			No	each project is custom/unique	NA			important	Yes, we are actively involved		N/A		N/A	N/A	N/A	N/A			Yes	Yes
77	27	1980-01-01 00:00:00	11	en	429166999	yes	Yes	proteomics				Both are possible.	1-1000 GB		5-8	21-40 users per month		Yes	Yes	Yes	Yes	No	No	No	No		Yes	I would prefer a better communication in advance, means before the experiments starts, because then we have influence about all the details which are important for a significant assay	No			Yes	no	Yes		the training should lead the customers through the experiment so that he is able to perform the next experiment by it's own	very important	Yes, we are actively involved		N/A		N/A	N/A	N/A	N/A			Yes	No
78	28	1980-01-01 00:00:00	11	en	623639380	yes	Yes	flow cytometry				Both are possible.	1-1000 GB		1-4	21-40 users per month		Yes	Yes	Yes	No	No	No	No	No		No		No			No		Yes			very important	Yes, we provide information		N/A		Yes	Yes	No	Yes			N/A	N/A
79	29	1980-01-01 00:00:00	11	en	1740418955	yes	Yes	Other	Sequencing			The staff of the core facility does (the users don’t work at the core facility).	1-1000 MB		5-8	1-20 users per month		Yes	Yes	Yes	Yes	No	No	Yes	No		No		No			Yes	keeping the software updated	Yes		data analysis	very important	Yes, we are actively involved		N/A		N/A	N/A	N/A	N/A			Yes	Yes
80	32	1980-01-01 00:00:00	11	en	95318450	yes	Yes	flow cytometry				Both are possible.	I don’t know	variable, useres have to Transfer theier data from analyzer immediately	1-4	41-60 users per month		Yes	Yes	Yes	Yes	No	No	Yes	No		Yes	Management software for e.g. booking, user and project management, Q&A, follow-up on Projects/publications	No			Yes	Data protection, regular updates, proper user/project management	Yes		how to use the analyzer, how to plan, execute and analyze properly	very important	Yes, we are actively involved		N/A		N/A	N/A	N/A	N/A			Yes	Yes
81	33	1980-01-01 00:00:00	11	en	1530392359	yes	Yes	Other	Medicinal chemistry, peptide synthesis, small molecule synthesis			The staff of the core facility does (the users don’t work at the core facility).	I don’t know	We produce compounds not data.	1-4	1-20 users per month		Yes	Yes	Yes	No	No	No	No	No		No		No			No	For peptides it would be possible, for all other synthesis the differences between the orders are too much	No			very important	Yes, we are actively involved		N/A		N/A	N/A	N/A	N/A			Yes	No
82	34	1980-01-01 00:00:00	11	en	470589815	yes	Yes	Other	Bioinformatics			Both are possible.	1-1000 TB		1-4	21-40 users per month		Yes	Yes	Yes	No	No	No	Yes	No		No		No			No		Yes		Enable user to work idependently	very important	Yes, we provide information		N/A		Yes	Yes	Yes	Yes			N/A	N/A
83	35	1980-01-01 00:00:00	11	en	1183810429	yes	Yes	Other	lipidomics			The staff of the core facility does (the users don’t work at the core facility).	1-1000 GB		1-4	1-20 users per month		Yes	Yes	Yes	No	Yes	No	No	No		No		No			No		Yes		-understanding method and technology's fundamental principles and basis of operation. -Understanding data quality and assignment principles	very important	Yes, we are actively involved		N/A		N/A	N/A	N/A	N/A			Yes	Yes
84	38	1980-01-01 00:00:00	11	en	2044331580	yes	Yes	Other	electron microscopy			Both are possible.	1-1000 TB	large 3 d data sets	1-4	21-40 users per month		Yes	Yes	Yes	Yes	No	Yes	No	No		No		Yes	OpenIris	It is a good system with some peculiarities and sometimes very slowly. E-Mail contact is often used too. Often a personal face to face meeting is very helpful to understand the research questioning and to give optimal consultation.	N/A		Yes	using the microscopes or other devices	To provide the user with the best possible operation of the device and to help him in the best possible way. The user should gain security and be able to work independently. To show the user that he can always ask questions.	important	Yes, we are actively involved		N/A		N/A	N/A	N/A	N/A			Yes	Yes
85	39	1980-01-01 00:00:00	11	en	2143805349	yes	Yes	Other	human studies			Both are possible.	1-1000 MB		1-4	1-20 users per month		Yes	Yes	Yes	No	No	No	No	Yes		No		Yes	Adobe, Skype	This works fine especially with international collaborations.	N/A		Yes		Training on SOPs for the relevant techniques used in the study.	very important	Yes, we are actively involved		N/A		N/A	N/A	N/A	N/A			Yes	Yes
86	40		6	en	148686994	yes	Yes	microscopy				Both are possible.	1-1000 TB		>16	> 100 users per month		Yes	Yes	No	Yes	No	No	Yes	Yes		Yes		No			Yes		Yes			very important	Yes, we provide information		N/A		Yes	No	No	No			N/A	N/A
87	41	1980-01-01 00:00:00	11	en	1729714493	yes	Yes	Other	cell culture, protein expression and purification			Both are possible.	1-1000 MB		1-4	1-20 users per month		Yes	Yes	Yes	Yes	No	Yes	Yes	No		Yes	???	Yes	PPMS	Good, but not excellent	N/A		Yes		Safety, reliability, teaching	very important	Yes, we are actively involved		N/A		N/A	N/A	N/A	N/A			Yes	Yes
88	42	1980-01-01 00:00:00	11	en	1832814410	yes	Yes	flow cytometry				Both are possible.	1-1000 GB		1-4	41-60 users per month		No	Yes	Yes	Yes	No	No	Yes	No		No		No			Yes	we have already tools for booking instruments.... new tools would be better implemented in this web application	Yes		using the machines software	very important	Yes, we provide information		N/A		Yes	No	No	No			N/A	N/A
89	44	1980-01-01 00:00:00	11	en	1920176937	yes	Yes	microscopy				Both are possible.	1-1000 GB		1-4	21-40 users per month		Yes	Yes	Yes	Yes	No	No	Yes	No		No		No			No		Yes		To be trained to use the equipment in a proper way with regards to technical as well as scientific aspects.	very important	Yes, we provide information		N/A		Yes	Yes	Yes	Yes			N/A	N/A
90	46	1980-01-01 00:00:00	11	en	1966613562	yes	Yes	flow cytometry				The users work at the core facility (you provide the infrastructure only).	I don’t know		1-4	21-40 users per month		Yes	Yes	Yes	No	No	No	No	Yes		No		No			No	usually we better understand the problems in a face to face explanation/ chat	Yes		be sure that a user understand what he/she is doing with the instruments/ experiment	very important	Yes, we provide information		N/A		Yes	No	No	Yes			N/A	N/A
91	47		7	en	1858927665	yes	Yes	mouse				Both are possible.	I don’t know		1-4	1-20 users per month		Yes	Yes	Yes	Yes	No	Yes	No	Yes		No		No			No		No			very important	Yes, we are actively involved		N/A		N/A	N/A	N/A	N/A			Yes	Yes
92	48	1980-01-01 00:00:00	11	en	1984173789	yes	Yes	microscopy				Both are possible.	1-1000 GB		1-4	41-60 users per month		Yes	Yes	No	Yes	Yes	Yes	Yes	Yes		No		No			No		Yes			very important	Yes, we are actively involved		N/A		N/A	N/A	N/A	N/A			Yes	No
93	49	1980-01-01 00:00:00	11	en	1610099854	yes	Yes	histology				Both are possible.	I don’t know		1-4	1-20 users per month		Yes	Yes	Yes	No	No	No	No	No		No		No			No		Yes		processing of Tissue, fixation, use of suitable antibodies	very important	Yes, we provide information		N/A		Yes	Yes	No	No			N/A	N/A
94	50	1980-01-01 00:00:00	11	en	4887810	yes	Yes	microscopy				Both are possible.	1-1000 TB		1-4	1-20 users per month		Yes	Yes	Yes	Yes	No	No	No	No		No		No			No	more time-consuming	Yes		safety, sample preparation, microscope handling	very important	Yes, we are actively involved		N/A		N/A	N/A	N/A	N/A			Yes	No
95	53	1980-01-01 00:00:00	11	en	1611977055	yes	Yes	flow cytometry				Both are possible.	1-1000 TB		1-4	> 100 users per month		Yes	Yes	Yes	Yes	No	No	Yes	Yes		Yes	We have several different categories of equipment and several different categories of users. It would be nice to be able to more easily contact users by category/specific instrument in order to send announcements, notifications of service issues, etc.	No			Yes	We have a large number of users and these users frequrently fluctuate or change. I foresee a difficulty in being able to keep the platform up to date. I also see a difficulty in integrating it with our computer center here. We get very little IT support here.	Yes	All users are required to undergo training before using our equipment themselves. This is not required for users for whom we perform a service ourselves.	The most important aspect is that the user learns to use the equipment correctly, on the one hand to perform the measurement reproducibly and scientifically correct, and on the other hand so that the equipment is used without a risk of breaking it.	very important	Yes, we are actively involved		N/A		N/A	N/A	N/A	N/A			Yes	Yes
96	54	1980-01-01 00:00:00	11	en	2066097192	yes	Yes	proteomics				The staff of the core facility does (the users don’t work at the core facility).	1-1000 GB		1-4	21-40 users per month		Yes	Yes	No	No	No	Yes	Yes	No		Yes		Yes	iLab Agilent	it is important. As always there are some steps which would be nice to improve.	N/A		Yes		The users must understand what we are doing to plan the experiments and interpret the data.	very important	Yes, we provide information		N/A		Yes	No	Yes	No	skype		N/A	N/A
97	55	1980-01-01 00:00:00	11	en	824814831	yes	Yes	Other	bioinformatics			Both are possible.	1-1000 TB		1-4	21-40 users per month		Yes	Yes	No	No	Yes	Yes	Yes	No		Yes	respectful interactions would help	Yes	slack and self-made request systems	this helps efficiency, but it reduces visibility	N/A		Yes	training courses and hands-on workshops	support with data analysis, providing best-practises, training	very important	Yes, we provide information		N/A		Yes	No	No	No			N/A	N/A
98	57	1980-01-01 00:00:00	11	en	720429679	yes	Yes	genomics				The staff of the core facility does (the users don’t work at the core facility).	1-1000 TB		9-12	21-40 users per month		Yes	Yes	Yes	Yes	Yes	Yes	Yes	No		Yes	Better social media, more straight ticket, automation of requests	Yes	Zendesk	good	N/A		Yes		Design of experiment and analysis	moderately important	Yes, we are actively involved		N/A		N/A	N/A	N/A	N/A			Yes	Yes
99	59	1980-01-01 00:00:00	11	en	736187259	yes	Yes	microscopy				Both are possible.	1-1000 GB		1-4	1-20 users per month		Yes	Yes	Yes	No	No	No	No	No		No		No			Yes		Yes		safety for instruments and users, quality of results, throughput	very important	No	experimental design of what? Samples? Instruments? procedures? its a too generic question	Yes		N/A	N/A	N/A	N/A			N/A	N/A
100	60	1980-01-01 00:00:00	11	en	627193815	yes	Yes	Other	zebrafish			Both are possible.	I don’t know	We provide the zebrafish for injections or different analyses. Therefore we dont produce that much data. Only Mikroskop images which warry from flueresenz pictures which are small too two photon imaging and light sheed which are bigger.	1-4	1-20 users per month		Yes	Yes	Yes	No	No	No	No	Yes		No		No			Yes	Im not sure if all the users would use a new platform. More likely we get a mix which is then confusing	Yes	Handling the fish, injections and also using our microskops	The injection training. We inject mostly Morpholinos, if the volume changes there you will get a high variance in your results.	very important	Yes, we are actively involved		N/A		N/A	N/A	N/A	N/A			Yes	Yes
101	61	1980-01-01 00:00:00	11	en	1374159378	yes	Yes	genomics				Both are possible.	1-1000 TB		13-16	> 100 users per month		Yes	Yes	Yes	Yes	No	Yes	Yes	Yes		No		Yes	OTRS, Zammad	Generally positive. Sometimes tedious to configure and it still need discipline.	N/A		No	We would like to do this more but are missing resources.		important	Yes, we are actively involved		N/A		N/A	N/A	N/A	N/A			Yes	Yes
102	65	1980-01-01 00:00:00	11	en	2039265012	yes	Yes	protein expression				Both are possible.	1-1000 GB		5-8	21-40 users per month		Yes	Yes	Yes	Yes	No	No	Yes	No		No		No			Yes		Yes			important	Yes, we are actively involved		N/A		N/A	N/A	N/A	N/A			Yes	Yes
103	66	1980-01-01 00:00:00	11	en	105831384	yes	Yes	histology				Both are possible.	I don’t know		1-4	1-20 users per month		Yes	Yes	Yes	No	No	No	No	No		No		No			Yes		Yes		hands on- to ensure machines work properly	important	Yes, we are actively involved		N/A		N/A	N/A	N/A	N/A			Yes	No
104	69	1980-01-01 00:00:00	11	en	418734430	yes	Yes	cell culture				Both are possible.	I don’t know		1-4	> 100 users per month		Yes	Yes	Yes	Yes	No	Yes	No	Yes		No		No			Yes	Installing/managing the software	Yes	I train users in basic aseptic technique if required.		very important	No	Principle investigators guide experimental design when setting up cell culture experiments	No		N/A	N/A	N/A	N/A			N/A	N/A
105	71	1980-01-01 00:00:00	11	en	1309507418	yes	Yes	microscopy				The staff of the core facility does (the users don’t work at the core facility).	1-1000 MB		1-4	1-20 users per month		Yes	Yes	Yes	No	No	No	No	No		Yes	-regular seminars/workshop to get familiarized with the methods and work-flow of our service; so that expectations (time-line) and interpretation become real....	No			No	I prefer face -to-face communication/interaction	No	..as it is was never requested...		important	Yes, we are actively involved		N/A		N/A	N/A	N/A	N/A			Yes	No
106	72	1980-01-01 00:00:00	11	en	1043488773	yes	Yes	Other	functional genomics			Both are possible.	1-1000 MB		>16	21-40 users per month		Yes	Yes	No	Yes	No	No	Yes	No		Yes		No			No		Yes			important	Yes, we are actively involved		N/A		N/A	N/A	N/A	N/A			Yes	No
107	73	1980-01-01 00:00:00	11	en	1585471163	yes	Yes	protein expression				Both are possible.	I don’t know		1-4	1-20 users per month		Yes	Yes	Yes	No	No	No	Yes	Yes		No		No			Yes		Yes		theorical and technical aspects	very important	Yes, we are actively involved		N/A		N/A	N/A	N/A	N/A			Yes	Yes
108	74	1980-01-01 00:00:00	11	en	330904630	yes	Yes	microscopy				Both are possible.	1-1000 GB		1-4	41-60 users per month		Yes	Yes	No	Yes	No	Yes	Yes	Yes		Yes	It is good overall but if we could reach even more users that woudl be great.	Yes	Stratocore PPMS	It works well for users who are already using the facility	N/A		Yes	1:1 training as well as short theory courses	understanding the user's specific need to perform the experiment well. Giving the user the information they need to use equipment save and well. Signing the user of an as independent user so we know that the equipment will not be damaged and the data produced is scientifically sound.	very important	Yes, we are actively involved		N/A		N/A	N/A	N/A	N/A			Yes	No
109	75	1980-01-01 00:00:00	11	en	406863215	yes	Yes	metabolomics				The staff of the core facility does (the users don’t work at the core facility).	1-1000 MB		1-4	1-20 users per month		Yes	Yes	Yes	Yes	No	Yes	Yes	No		Yes	better tracking systems for users to know how far in the analysis their samples are	Yes	PPMS	not ideal for the applications at the facility	N/A		Yes		sample preparation and data analysis for biological interpretation	important	Yes, we are actively involved		N/A		N/A	N/A	N/A	N/A			Yes	No
110	78	1980-01-01 00:00:00	11	en	212054743	yes	Yes	flow cytometry				Both are possible.	1-1000 GB		1-4	> 100 users per month		Yes	Yes	Yes	No	Yes	Yes	Yes	No		Yes		Yes	AGENDO	Really great, is a very nice s¡platform	N/A		Yes		personalized	very important	Yes, we are actively involved		N/A		N/A	N/A	N/A	N/A			Yes	Yes
111	79	1980-01-01 00:00:00	11	en	90203748	yes	Yes	genomics				Both are possible.	1-1000 TB		5-8	1-20 users per month		Yes	Yes	Yes	Yes	Yes	No	Yes	Yes		Yes	Better communicate to get feedbacks and discover new users	No			Yes	We are not tracking correctly contacts and user information.	No			moderately important	Yes, we provide information		N/A		Yes	Yes	No	Yes			N/A	N/A
112	80	1980-01-01 00:00:00	11	en	1341638491	yes	Yes	microscopy				Both are possible.	1-1000 TB		9-12	41-60 users per month		Yes	Yes	Yes	Yes	Yes	No	Yes	No		No		No			Yes		Yes		tailored training	very important	Yes, we are actively involved		N/A		N/A	N/A	N/A	N/A			Yes	No
113	81		7	en	1998450224	yes	Yes	flow cytometry				Both are possible.	1-1000 GB		1-4	41-60 users per month		Yes	Yes	Yes	No	No	Yes	No	No		No		Yes	PPMS	It is perfect for booking appointments or time on the instruments. The first contact and meeting for sort projects still need to be done by phone or email.	N/A		Yes		Knowledge about the technique and how to handle the instruments with care. Moreover, they need to know what the research questions and using the right controls for their experiments.	very important	Yes, we provide information		N/A		Yes	Yes	No	Yes			N/A	N/A
114	82	1980-01-01 00:00:00	11	en	1262819341	yes	Yes	flow cytometry				Both are possible.	I don’t know		5-8	> 100 users per month		Yes	Yes	No	Yes	No	Yes	Yes	No		No		Yes	IRIS	Works well but is sometimes a bit slow	N/A		Yes		Making sure the users understand the technology and obey the rules of the platform	very important	Yes, we provide information		N/A		Yes	No	No	Yes			N/A	N/A
115	83	1980-01-01 00:00:00	11	en	1246950830	yes	Yes	microscopy				Both are possible.	1-1000 GB		1-4	1-20 users per month		Yes	Yes	Yes	No	No	No	No	Yes		No		No			No		Yes		knowledge/method tranfer methodical education interpretation of results	very important	Yes, we provide information		N/A		Yes	No	No	No			N/A	N/A
116	84	1980-01-01 00:00:00	11	en	178484601	yes	Yes	metabolomics				Both are possible.	1-1000 GB		1-4	1-20 users per month		Yes	Yes	No	No	No	No	Yes	Yes		No		No			No		Yes		Sample preparation, data analysis, statistics	very important	Yes, we are actively involved		N/A		N/A	N/A	N/A	N/A			Yes	Yes
117	85	1980-01-01 00:00:00	11	en	590538117	yes	Yes	flow cytometry				Both are possible.	1-1000 GB	Mass Cytometry included	5-8	41-60 users per month		Yes	Yes	No	No	Yes	No	No	No		No		No			No	too much communication is not helpful. Today, our students and users receive a lot of information every day from all the other laboratories and cores. We must find the best compromise possible to communicate with them in order to transmit only useful information ....	Yes		Practical sessions and protocol overview	very important	Yes, we provide information		N/A		Yes	No	No	No			N/A	N/A
118	89	1980-01-01 00:00:00	11	en	1676746827	yes	Yes	genomics				The staff of the core facility does (the users don’t work at the core facility).	1-1000 TB		>16	81-100 users per month		Yes	Yes	Yes	Yes	No	No	Yes	No		No		No			Yes	No, except that most users are used to communicate directly with the platform staff	Yes		Discussion about the project's strategy / general knowledge on what to expect from the state-of-the-art genomics & bioinformatics methodologies	important	Yes, we are actively involved		N/A		N/A	N/A	N/A	N/A			Yes	No
119	90	1980-01-01 00:00:00	11	en	621973099	yes	Yes	microscopy				Both are possible.	1-1000 GB		1-4	61-80 users per month		Yes	Yes	Yes	Yes	Yes	No	Yes	No		Yes	I would like to be sure that my users read the microscopes checkup emails we send every months.	No			No	Time consumming : we already have mails, twitter, reservation center, image database... too much software to handle.	Yes		Image understanding : notions as bit depth, dynamic, resolution are quite difficult to teach to biologists. Microscope use : try not to break lens. High end microscopy technics (FLIM, 2P, STED, PALM/STORM) are quite difficult to handle, we have to spend lot of time explaining details. Concretly, if I feel the user I train is not capable, we (the facility) are in charge of the acquisitions.	very important	Yes, we provide information		N/A		Yes	Yes	No	Yes			N/A	N/A
120	91	1980-01-01 00:00:00	11	en	1181564303	yes	Yes	proteomics				The staff of the core facility does (the users don’t work at the core facility).	1-1000 GB		5-8	1-20 users per month		Yes	Yes	Yes	No	No	No	No	No		No		No			No	I answered yes to the question above, but one has to define what is meant. Concretely, what is a communication platform ? The worry is that we end up spending even more of our time (it is already a lot...) discussing with users. I would rather try to find ways to have users to learn a little bit more by themselves.	No	We explain the techniques and especially the output but we do not train them to do experiments themselves. They should become proficient in analysing the results, however. That is much more important.		important	Yes, we are actively involved		N/A		N/A	N/A	N/A	N/A			Yes	No
121	92	1980-01-01 00:00:00	11	en	1070378058	yes	Yes	microscopy				Both are possible.	1-1000 GB		1-4	1-20 users per month		Yes	Yes	Yes	Yes	No	Yes	No	No		No		Yes	OCF Scheduler Ver. 2.03	For informing users about system downs it is not convenient but absolutely sufficient. All other communication tasks are solved by personal communication.	N/A		Yes		Operating the systems without damaging them. In second place would be the goal to get the most out of the individual experiments.	very important	Yes, we are actively involved		N/A		N/A	N/A	N/A	N/A			Yes	Yes
122	93	1980-01-01 00:00:00	11	en	1103371484	yes	Yes	Other	Microcalorimetry - SPR			Both are possible.	1-1000 GB		1-4	1-20 users per month		Yes	Yes	No	Yes	Yes	No	No	Yes		No		No			Yes		Yes	Training is performed for some techniques. For other (UCA, PEAQ-DSC automat), only ingineers are in charge of the measurements		very important	Yes, we are actively involved		N/A		N/A	N/A	N/A	N/A			Yes	No
123	94	1980-01-01 00:00:00	11	en	582532729	yes	Yes	Other	Molecular Biophysics			Both are possible.	1-1000 GB		5-8	21-40 users per month		Yes	Yes	Yes	Yes	No	Yes	Yes	Yes		Yes	Involving more the users in the core facility development	Yes	Outlook and PPMS	good but insufficient	N/A		Yes		* Understanding bot the operational aspects of an instrument and the underlying physical principles * Understanding how to set-up a sound experimental strategy * Understanding how to analyse correctly the data	very important	Yes, we are actively involved		N/A		N/A	N/A	N/A	N/A			Yes	No
124	95	1980-01-01 00:00:00	11	en	1736028523	yes	Yes	histology				The staff of the core facility does (the users don’t work at the core facility).	I don’t know		1-4	1-20 users per month		Yes	Yes	Yes	Yes	No	Yes	Yes	No		No		Yes	OpenIRIS		N/A		Yes	seminars about sample handling and techniques	proper handling of samples, read-out, analysis	very important	Yes, we provide information		N/A		Yes	Yes	Yes	Yes			N/A	N/A
125	96	1980-01-01 00:00:00	11	en	1240598113	yes	Yes	proteomics				Both are possible.	1-1000 TB		13-16	> 100 users per month		Yes	Yes	Yes	No	No	Yes	No	No		Yes		Yes	in-house		N/A		Yes			important	Yes, we are actively involved		N/A		N/A	N/A	N/A	N/A			Yes	Yes
126	98	1980-01-01 00:00:00	11	en	831597969	yes	Yes	flow cytometry				The users work at the core facility (you provide the infrastructure only).	I don’t know	User data are not accessible to us, we provide server infrastructure for data processing and data analysis, probably our it support could read out the amount of data on the server at one day.	5-8	41-60 users per month		Yes	Yes	Yes	Yes	Yes	No	Yes	No		No		No			No	I would like to improve the communication with the PIs, users leave the facilites after 2-5 years. PIs influence the development of the facility 10-30 years!	Yes	We dont train them how to perform experiments. We train them how to prepare the material (Cellstaining), how to acquire data and how to analyze these data in general. We expect training in experimental controls, answering biological research questions and biosafety from the PIs. (We just control the above topics).	- Fundamental knowledge including principles of math behind the technologies we teach - Maria Montessori concept: we teach them how to do it themselves. They should not get dependent on the scientists in the facility but become a scientist in a facility. The student I teach today, could become my employer tomorrow :-)	very important	Yes, we provide information		N/A		Yes	No	Yes	Yes			N/A	N/A
127	99	1980-01-01 00:00:00	11	en	1302704308	yes	Yes	microscopy				Both are possible.	1-1000 TB		1-4	41-60 users per month		Yes	Yes	Yes	No	No	No	No	No		No		No			No		Yes		instrument usage background information on imaging	very important	Yes, we provide information		N/A		Yes	Yes	Yes	Yes			N/A	N/A
128	101	1980-01-01 00:00:00	11	en	1162623608	yes	Yes	microscopy				Both are possible.	1-1000 GB		1-4	81-100 users per month		Yes	Yes	No	Yes	No	Yes	Yes	Yes		No		Yes	Clustermarket (has an integral "Announcement" system that can message all users or users in groups specific to equipment that they have been trained on).	It's new and I'm still trialling it, but so far ok.	N/A		Yes		Continuing support and development of the trainee as they develop their expertise.	very important	Yes, we are actively involved		N/A		N/A	N/A	N/A	N/A			Yes	No
129	102	1980-01-01 00:00:00	11	en	1198149373	yes	Yes	microscopy				Both are possible.	1-1000 GB		1-4	21-40 users per month		Yes	Yes	No	Yes	No	No	No	Yes		Yes	I would like them to understand things better	No			No	GDPR, our IT systems	Yes		Train to use equipment independently	very important	Yes, we are actively involved		N/A		N/A	N/A	N/A	N/A			Yes	No
130	103	1980-01-01 00:00:00	11	en	488944277	yes	Yes	flow cytometry				Both are possible.	1-1000 GB		1-4	61-80 users per month		Yes	Yes	No	No	No	Yes	Yes	No		Yes	We often send emails to our users containing important information and it is apparent that not everyone bothers to read these emails. Finding a way to ensure that they do read the emails or a more effective way of relaying information would be helpful.	Yes	PPMS	We love it. It is an excellent booking and financial management system. It also gives us a way of recording all communication pertaining to a particular piece of work/training etc	N/A		Yes		Ensuring that users are able to obtain correct and relevant data	very important	Yes, we are actively involved		N/A		N/A	N/A	N/A	N/A			Yes	No
131	104	1980-01-01 00:00:00	11	en	663450877	yes	Yes	flow cytometry				Both are possible.	I don’t know		13-16	> 100 users per month		Yes	Yes	Yes	No	No	No	No	No		No		No			No		Yes		Clarity and knowledge of how to use the software	very important	Yes, we provide information		N/A		Yes	No	No	No			N/A	N/A
132	105	1980-01-01 00:00:00	11	en	358992968	yes	Yes	flow cytometry				Both are possible.	1-1000 GB		1-4	21-40 users per month		Yes	Yes	No	Yes	No	No	Yes	Yes		Yes	I think younger users respond better to social media and I should look to offer notifications via this route	No			Yes	Cost. Data protection.	Yes	I advise but know that many people ignore this advice.	Proper use of cytometers.	very important	Yes, we provide information		N/A		Yes	No	Yes	Yes			N/A	N/A
133	106	1980-01-01 00:00:00	11	en	615090661	yes	Yes	genomics				The staff of the core facility does (the users don’t work at the core facility).	1-1000 GB		1-4	21-40 users per month		Yes	Yes	No	Yes	No	Yes	No	No		No		Yes	agendo, slack		N/A		No			very important	Yes, we are actively involved		N/A		N/A	N/A	N/A	N/A			Yes	No
134	108	1980-01-01 00:00:00	11	en	1923374404	yes	Yes	microscopy				Both are possible.	1-1000 MB		1-4	1-20 users per month		Yes	Yes	No	No	No	No	No	No		No		No			No		Yes			very important	Yes, we are actively involved		N/A		N/A	N/A	N/A	N/A			Yes	No
135	110	1980-01-01 00:00:00	11	en	1780197341	yes	Yes	Other	behavior			The users work at the core facility (you provide the infrastructure only).	1-1000 GB		1-4	1-20 users per month		Yes	Yes	No	Yes	No	Yes	No	No		Yes	integrate an instant messaging in the platform syste (so not to rely on other "public" services like whatsapp)	Yes	Booked-scheduler	Very good for planning, limited ability for communication (mailing list + alerts on the website)	N/A		Yes		How to design the experiment so that the researchers measures what he/she actually intends to measure	very important	Yes, we are actively involved		N/A		N/A	N/A	N/A	N/A			Yes	No
136	112	1980-01-01 00:00:00	11	en	839932979	yes	Yes	microscopy				Both are possible.	1-1000 GB		1-4	1-20 users per month		Yes	Yes	Yes	Yes	No	No	Yes	No		Yes	More support to do this provided by the university	No			Yes		Yes		To help the users to be independently able to use the equipment and to understand optimal ways to prepare samples for their experiments. To make sure that the technicians and facility manager are up to date in their knowledge and expertise.	very important	Yes, we provide information		N/A		Yes	Yes	No	Yes			N/A	N/A
137	114	1980-01-01 00:00:00	11	en	1923093990	yes	Yes	flow cytometry				Both are possible.	I don’t know		1-4	1-20 users per month		Yes	Yes	Yes	No	No	Yes	Yes	No		No		No			No		Yes			very important	Yes, we provide information		N/A		Yes	No	No	Yes			N/A	N/A
138	115		6	en	1029610564	yes	Yes	flow cytometry				Both are possible.	1-1000 MB		1-4	1-20 users per month		Yes	No	No	No	No	No	No	No		No		No			No		NA			important	Yes, we provide information		N/A		Yes	No	Yes	No			N/A	N/A
139	117	1980-01-01 00:00:00	11	en	2114443998	yes	Yes	metabolomics				Both are possible.	1-1000 GB		1-4	21-40 users per month		Yes	Yes	Yes	No	Yes	No	No	No		No		No			No	e-mail works very well. Where I've used communication software to communicate with other platforms, for example some branches of computing infrastructure support, it's been far more of a hindrance than a help.	Yes		well-trained users get good results and don't break things.	very important	Yes, we provide information		N/A		Yes	No	Yes	Yes			N/A	N/A
140	118	1980-01-01 00:00:00	11	en	1901959966	yes	Yes	microscopy				Both are possible.	1-1000 TB		1-4	1-20 users per month		Yes	Yes	Yes	No	No	No	No	Yes		No		No			No		Yes		attention to detail and safety	very important	Yes, we are actively involved		N/A		N/A	N/A	N/A	N/A			Yes	No
141	120	1980-01-01 00:00:00	11	en	1157880378	yes	Yes	flow cytometry				Both are possible.	1-1000 GB		9-12	> 100 users per month		Yes	Yes	No	No	Yes	No	Yes	Yes		Yes	The reach for each of these methods is low, we try to have as many as possible but it is still hard to get information across.	No			Yes	It would need to be something used by all cores. Soemthing that seems quite difficult to achieve!	Yes		Users need to understand what the Lab provides and how they can access training. Sample prep seems a common aspect in all cores	very important	Yes, we are actively involved		N/A		N/A	N/A	N/A	N/A			Yes	No
142	121		10	en	2064503242	yes	Yes	Other	mass cytometry and bioinformatics			Both are possible.	1-1000 GB		9-12	> 100 users per month		Yes	Yes	Yes	Yes	No	Yes	Yes	Yes		No		No			No	setup working between 2 organizations	Yes		comprehensive training from planning to data analysis hands on and theory	very important	Yes, we are actively involved		N/A		N/A	N/A	N/A	N/A			Yes	Yes
143	122	1980-01-01 00:00:00	11	en	444462838	yes	Yes	flow cytometry				The users work at the core facility (you provide the infrastructure only).	1-1000 GB		1-4	41-60 users per month		Yes	Yes	No	No	No	No	Yes	No		No		No			No		Yes		Safety relating to samples, software instruction	very important	Yes, we provide information		N/A		Yes	No	No	Yes			N/A	N/A
144	123	1980-01-01 00:00:00	11	en	2003501528	yes	Yes	Other	MRI, CT, ultrasound, PET, SPECT, optical imaging, photoacoustics			Both are possible.	1-1000 GB		1-4	1-20 users per month		Yes	Yes	Yes	No	No	No	Yes	No		Yes	better website, social media as well as more "show and tell" type opportunities	No			No	Even though the idea is good, most people already are overwhelmed with information overload and may be resistant to subscribing to another platform	Yes		Mostly involves with training in the operation of the instrument as well as data analysis	very important	Yes, we provide information		N/A		Yes	No	Yes	Yes			N/A	N/A
145	127	1980-01-01 00:00:00	11	en	1743669220	yes	Yes	protein expression				Both are possible.	I don’t know		1-4	41-60 users per month		Yes	Yes	No	Yes	Yes	Yes	Yes	Yes		No		Yes	Microsoft Teams and iLab (Agilent)		N/A		Yes		Confidence that the users understand what they've been taught and take that knowledge away with them. My personal ethos about running a core facility is that as well as providing equipment/services, our main purpose is to provide knowledge and skills to our users.	very important	Yes, we are actively involved		N/A		N/A	N/A	N/A	N/A			Yes	Yes
146	128	1980-01-01 00:00:00	11	en	887362630	yes	Yes	flow cytometry				Both are possible.	I don’t know		1-4	21-40 users per month		Yes	Yes	No	No	No	No	No	No		Yes		No			Yes		Yes			important	Yes, we provide information		N/A		Yes	No	No	No			N/A	N/A
147	129	1980-01-01 00:00:00	11	en	549020741	yes	Yes	flow cytometry				Both are possible.	I don’t know		5-8	41-60 users per month		Yes	Yes	Yes	No	No	No	Yes	No		No		No			Yes		Yes			very important	Yes, we provide information		N/A		Yes	No	No	Yes			N/A	N/A
148	131	1980-01-01 00:00:00	11	en	469952666	yes	Yes	microscopy				The users work at the core facility (you provide the infrastructure only).	1-1000 TB	probably 1 - 10 TB	1-4	61-80 users per month		Yes	Yes	Yes	Yes	No	No	Yes	No		Yes	Having more time per user would be good.	No			No		Yes		One to one training with samples provided by the user to establish the best way to acquire the data.	very important	Yes, we provide information		N/A		Yes	No	No	No			N/A	N/A
149	132	1980-01-01 00:00:00	11	en	1727847457	yes	Yes	NMR				Both are possible.	1-1000 MB		1-4	1-20 users per month		Yes	Yes	Yes	No	No	No	Yes	Yes		No		No			No		Yes		Possibilities and Limitations of methods, background knowledge for students/postDocs	moderately important	Yes, we are actively involved		N/A		N/A	N/A	N/A	N/A			Yes	No
150	134	1980-01-01 00:00:00	11	en	1033307334	yes	Yes	microscopy				Both are possible.	I don’t know		1-4	1-20 users per month		Yes	Yes	No	No	No	No	No	Yes		Yes	web based chat for routine comunication	No			Yes		Yes		Lab work and instrument safety.	very important	Yes, we provide information		N/A		Yes	No	No	No			N/A	N/A
151	135		10	en	336398433	yes	Yes	flow cytometry				Both are possible.	1-1000 GB		1-4	81-100 users per month		Yes	Yes	No	Yes	No	No	Yes	No		No		No			No		Yes			very important	Yes, we are actively involved		N/A		N/A	N/A	N/A	N/A			Yes	No
152	137	1980-01-01 00:00:00	11	en	1994844325	yes	Yes	flow cytometry				Both are possible.	1-1000 GB		1-4	1-20 users per month		Yes	Yes	No	No	No	No	Yes	No	announcements on Schedule	Yes	I think there is a LOT that can be communicated, but every person needs to know something different. Putting too much out there, or having announcements/signs seems to create sign blindness and no one looks at it.	No			No	one more thing to register, keep up with, pay for?	Yes		Convincing people to provide the correct controls.	very important	Yes, we provide information		N/A		Yes	No	No	Yes			N/A	N/A
153	138	1980-01-01 00:00:00	11	en	2034292187	yes	Yes	proteomics				The staff of the core facility does (the users don’t work at the core facility).	1-1000 GB		1-4	21-40 users per month		Yes	Yes	Yes	Yes	No	No	Yes	No		Yes		No			Yes		Yes			important	Yes, we are actively involved		N/A		N/A	N/A	N/A	N/A			Yes	Yes
154	139	1980-01-01 00:00:00	11	en	469107680	yes	Yes	flow cytometry				Both are possible.	I don’t know		5-8	1-20 users per month		Yes	Yes	No	No	No	No	No	No		Yes		No			Yes	Time	Yes			important	Yes, we provide information		N/A		Yes	Yes	No	No			N/A	N/A
155	140	1980-01-01 00:00:00	11	en	1757734136	yes	Yes	flow cytometry				Both are possible.	1-1000 MB		1-4	1-20 users per month		Yes	Yes	No	No	No	No	No	No		No		No			No		Yes			important	Yes, we provide information		N/A		Yes	No	No	No			N/A	N/A
156	141	1980-01-01 00:00:00	11	en	991619141	yes	Yes	microscopy				Both are possible.	1-1000 TB	Wildly variable and we don't keep records - users are responsible for their own data & back up but about 2Tb	1-4	41-60 users per month		Yes	Yes	No	Yes	No	No	No	Yes		No		No			No	Fragmentation, - different groups want to use different platforms lack of adoption - I refuse to use anything that requires me to install software on my own devices. I've tried slack, teams & trello and given up on all of them as merely gimmicks	Yes	No one uses anything until they've been assessed by us.	Safety	very important	Yes, we are actively involved		N/A		N/A	N/A	N/A	N/A			Yes	Yes
157	142	1980-01-01 00:00:00	11	en	1073372785	yes	Yes	flow cytometry				Both are possible.	1-1000 TB		1-4	41-60 users per month		Yes	Yes	No	No	Yes	No	Yes	No	Slack	Yes		Yes	Slackm What'sApp	Even though I've set up a Slack page to report instrument issues - users are resistant to using it. They seem to prefer email or phone call - which i am less likely to respond to (i don't check emails out of hours or answer my phone - whereas instant messenger i am much more likely to respond to - it's also easier to fix issues over instant messenger as opposed to email, especially whilst sorting…	N/A		Yes		Cytometer operation	very important	Yes, we provide information		N/A		Yes	No	Yes	Yes			N/A	N/A
158	143	1980-01-01 00:00:00	11	en	1178940880	yes	Yes	flow cytometry				Both are possible.	1-1000 GB		1-4	41-60 users per month		Yes	Yes	Yes	Yes	No	No	Yes	No		No		No			No		Yes	We provide training for all three instruments, but allow independent use of only one. Training is also provided for data analysis	That users are able to operate FACS analysers independently of core facility Training in the use of appropriate analysis software for flow cytometry generated data.	very important	Yes, we are actively involved		N/A		N/A	N/A	N/A	N/A			Yes	No
159	144	1980-01-01 00:00:00	11	en	556397274	yes	Yes	microscopy				Both are possible.	1-1000 TB		5-8	41-60 users per month		Yes	Yes	Yes	Yes	No	No	No	No		No		No			No		Yes		aim of our training s is to make users indipendent on the instrument usage/ experimental setup	very important	Yes, we are actively involved		N/A		N/A	N/A	N/A	N/A			Yes	Yes
160	145	1980-01-01 00:00:00	11	en	1177399325	yes	Yes	mouse				Both are possible.	I don’t know		1-4	21-40 users per month		Yes	Yes	Yes	No	No	No	No	No		Yes	by using a software	No			Yes		Yes		accurate training by our staff giving SOP (wtitten or in electronic form) to be always reachable even after termination of training in case users have further questions or trouble shooting	very important	Yes, we are actively involved		N/A		N/A	N/A	N/A	N/A			Yes	Yes
161	146	1980-01-01 00:00:00	11	en	1843623440	yes	Yes	histology				Both are possible.	I don’t know		9-12	21-40 users per month		Yes	Yes	No	No	No	No	Yes	Yes		Yes	More automated communication to save users asking for updates that take up staff time	No			Yes	We are actually investigating service now to have automated communication steps but are trying to tie this in with other softwares for data storage (such as filemaker)	Yes		Thorough training following SOP's	very important	Yes, we provide information		N/A		Yes	No	No	Yes			N/A	N/A
162	147	1980-01-01 00:00:00	11	en	1746146774	yes	Yes	Other	biosamples			The staff of the core facility does (the users don’t work at the core facility).	< 1MB		5-8	1-20 users per month		Yes	Yes	Yes	Yes	No	No	No	Yes		Yes	standardized workflows for exchange of documents and improved internal project management and documentation	No			Yes	data protection issues (human data)	No			important	Yes, we provide information		N/A		Yes	Yes	Yes	Yes			N/A	N/A
163	148	1980-01-01 00:00:00	11	en	1908025317	yes	Yes	microscopy				Both are possible.	1-1000 TB		1-4	1-20 users per month		Yes	Yes	No	Yes	Yes	No	Yes	No		No		No			No		Yes		Finding the best technique to answer the scientific question.	very important	Yes, we provide information		N/A		Yes	No	Yes	Yes			N/A	N/A
164	149	1980-01-01 00:00:00	11	en	729227449	yes	Yes	NMR				Both are possible.	1-1000 GB		1-4	1-20 users per month		Yes	Yes	Yes	Yes	No	No	Yes	No		No		No			No		Yes		Enabling users to be set up their own experiments	very important	Yes, we are actively involved		N/A		N/A	N/A	N/A	N/A			Yes	Yes
165	151	1980-01-01 00:00:00	11	en	601070912	yes	Yes	metabolomics				Both are possible.	1-1000 GB	In general metabolomics data is not a huge concern compared to other platforms/facilities. This will change in the future as mass spectrometry experiments become more detailed, or if mass spec imaging is employed.	5-8	61-80 users per month		Yes	Yes	Yes	No	No	No	Yes	No		No		No			No	In my opinion, all projects are best approached with a REAL conversation. This may be more true for metabolomics (where each experiment is carefully tailored to the individual) than other fields	Yes	Yes, dependent on the expected future usage - i.e. if they will be regular users, we will put the time in to train them	Clarity and ensuring that users are only able to operate machines/perform data analysis when we are convinced that they are competent.	important	Yes, we are actively involved		N/A		N/A	N/A	N/A	N/A			Yes	Yes
166	152	1980-01-01 00:00:00	11	en	974479128	yes	Yes	flow cytometry				Both are possible.	1-1000 GB		9-12	41-60 users per month		Yes	Yes	No	No	No	Yes	No	Yes		Yes	More face to face discussion with them BEFORE projects start	Yes	PPMS. It is mostly a booking system, but we also use it to send notes to users about their bookings.	It works ok, but as they get so many emails from PPMS, some of our messages fall between the cracks. Face to face is better but we have over 80 groups that use us so this is not always feasible.	N/A		Yes		Getting users to become knowledgeable and skilful enough to design, acquire, and analyse their own experiments independently.	very important	Yes, we are actively involved		N/A		N/A	N/A	N/A	N/A			Yes	No
167	154	1980-01-01 00:00:00	11	en	1272468720	yes	Yes	flow cytometry				Both are possible.	1-1000 MB		1-4	61-80 users per month		Yes	Yes	Yes	No	No	No	Yes	Yes		No		Yes	Qualtrics	Works well for surveys	N/A		Yes		Train user to look after the instruments	very important	Yes, we provide information		N/A		Yes	No	No	Yes			N/A	N/A
168	155	1980-01-01 00:00:00	11	en	1117674643	yes	Yes	cell culture				Both are possible.	1-1000 MB		1-4	1-20 users per month		Yes	Yes	Yes	No	No	No	No	No		No		No			Yes		Yes			very important	Yes, we are actively involved		N/A		N/A	N/A	N/A	N/A			Yes	No
169	156	1980-01-01 00:00:00	11	en	764368081	yes	Yes	genomics				Both are possible.	1-1000 GB		1-4	21-40 users per month		Yes	Yes	Yes	No	No	No	Yes	Yes		No		No			Yes	It is hard to say without seeing the type of software we are talking about	Yes		Close interaction with the end-user to enhance their projects	important	Yes, we are actively involved		N/A		N/A	N/A	N/A	N/A			Yes	No
170	158	1980-01-01 00:00:00	11	en	26154053	yes	Yes	microscopy				The users work at the core facility (you provide the infrastructure only).	I don’t know		1-4	81-100 users per month		Yes	Yes	No	Yes	No	Yes	No	No		Yes	The problem seems to be getting them to listen, as we send out information but they don't read it	No			No	We already have too many different platforms for people to ignore	Yes		Making sure they can use equipment safely	very important	Yes, we provide information		N/A		Yes	No	No	Yes			N/A	N/A
171	159	1980-01-01 00:00:00	11	en	1119256401	yes	Yes	Other	High Throughput Screening			Both are possible.	1-1000 TB		1-4	21-40 users per month		Yes	Yes	No	No	No	No	No	No		Yes	Ideally users would have greater visibility of all of the work that is done for them rather than just the final outcome	Yes	Within the team we use Microsoft Teams; we are currently trialing ServiceNow, a ticketing system to improve project progression visibilty to users and enable gathering of metrics of facility activity	We searched long and hard for a usable Electronic notebook that could enable easy communication with users, record all of the different activities of facility staff, project progression and machine use etc but there isnt a single solution that was easy to implement locally	N/A		Yes	If they want to be trained. Most elect not to do so. The main purpose of training is that it enables users to ask better questions rather than giving them independence	There is training for specific machine use which only a few users take up. Much of our training is also quite ad hoc and generalised 'how to do a good experiment' training as not all students have such education in their home labs	moderately important	Yes, we are actively involved		N/A		N/A	N/A	N/A	N/A			Yes	Yes
172	160	1980-01-01 00:00:00	11	en	119341020	yes	Yes	proteomics				The staff of the core facility does (the users don’t work at the core facility).	1-1000 GB		5-8	21-40 users per month		Yes	Yes	Yes	Yes	No	Yes	Yes	Yes		No		Yes	own software for ordering of services allows us to use chat and discussion forum	very positive feedback from users	N/A		Yes		We are part of the university so we train master and Ph.D. students.	moderately important	Yes, we are actively involved		N/A		N/A	N/A	N/A	N/A			Yes	No
173	161	1980-01-01 00:00:00	11	en	1591690681	yes	Yes	microscopy				Both are possible.	1-1000 TB		5-8	61-80 users per month		Yes	Yes	Yes	No	No	Yes	Yes	No		No		Yes	PPMS	Good	N/A		Yes		1:1 and at the instruments	very important	Yes, we provide information		N/A		Yes	No	Yes	Yes			N/A	N/A
174	162	1980-01-01 00:00:00	11	en	23283661	yes	Yes	flow cytometry				Both are possible.	1-1000 GB		1-4	1-20 users per month		Yes	Yes	Yes	No	No	No	Yes	Yes		No		No			Yes		Yes		The correct use of the machine and the correct execution of the project to achieve the best standards in flow cytometry.	very important	Yes, we are actively involved		N/A		N/A	N/A	N/A	N/A			Yes	No
175	164	1980-01-01 00:00:00	11	en	1077405461	yes	Yes	genomics				Both are possible.	1-1000 TB		5-8	1-20 users per month		Yes	Yes	Yes	Yes	No	No	Yes	Yes		Yes	Greater awareness of our facilities nationally would be good. Have operated for 10 years but still surprising to meet individual researchers who have never heard of our existence. Also, would be great to increase the proportion of users that actually read our guidelines on how to use our facilities.	No			No	I'm sceptical, but open to suggestion. I prefer to use one channel of communication where possible, thereby everone knows that essential info and communications go by that route. At the moment that channel is largely email, and I'd need a lot of convincing this can be improved.	Yes		I can't single out any one aspect. THere are a lot of details.	very important	Yes, we are actively involved		N/A		N/A	N/A	N/A	N/A			Yes	Yes
176	165	1980-01-01 00:00:00	11	en	1038766703	yes	Yes	microscopy				Both are possible.	1-1000 TB		1-4	41-60 users per month		Yes	Yes	Yes	No	No	No	Yes	Yes		No		No			Yes	no	Yes		Correct set up for the available hardware	very important	Yes, we provide information		N/A		Yes	Yes	Yes	Yes			N/A	N/A
177	166	1980-01-01 00:00:00	11	en	1245905029	yes	Yes	Other	electron microscopy			Both are possible.	1-1000 GB		1-4	1-20 users per month		Yes	Yes	Yes	Yes	No	No	No	No		Yes	Communication software would be an interesting idea.	No			Yes	The willingness of users to use it.	Yes		Teach people to use the instrument without destroying it. And in a way that gives the information they need.	very important	Yes, we provide information		N/A		Yes	Yes	No	Yes			N/A	N/A
178	167	1980-01-01 00:00:00	11	en	1511269866	yes	Yes	flow cytometry				Both are possible.	1-1000 MB		1-4	1-20 users per month		Yes	Yes	Yes	Yes	No	Yes	No	Yes		Yes	I would like to have the user report problems directly to me more often - now they sometimes just tell each other or make a small note in the paper user log and the information does not reach me or others in time. Then we find e.g. an instrument malfunction as an unpleasant surprise when coming to the instrument with samples already prepared etc.	Yes	Agendo booking system. It allows for sending messages also.	The booking platform works fine, but I suspect that users are not always reading the messages sent through it, or it is considered spam as their email filters.	N/A		Yes		Teaching researchers to technically use flow cytometers and interpret the results.	very important	Yes, we are actively involved		N/A		N/A	N/A	N/A	N/A			Yes	Yes
179	169	1980-01-01 00:00:00	11	en	198724796	yes	Yes	proteomics				The staff of the core facility does (the users don’t work at the core facility).	1-1000 TB		1-4	1-20 users per month		Yes	Yes	Yes	No	No	No	Yes	No		No		No			Yes	Limited time to keep all communication lines alive and updated.	No	Since users are not allowed to work within the CF, no need for training in this sense. However, sharing protocols and advising customers is of important to generate high quality data.		slightly important	Yes, we are actively involved		N/A		N/A	N/A	N/A	N/A			Yes	Yes
180	170	1980-01-01 00:00:00	11	en	1697269157	yes	Yes	microscopy				Both are possible.	1-1000 GB		1-4	21-40 users per month		Yes	Yes	Yes	Yes	No	No	Yes	No		No		No			No	it is better to use available comm. methods. People are reluctant to learn and use a new software (a separate login needed etc). An email list or a simple digital calendar should be enough to communicate. They already check their emails regularly for important messages and our digital reservation calendar is self explanatory.	Yes		1) Safety of users is the first thing in my training (laser and fluorescence light! ergonomics, toxic dyes etc.) 2) Proper use of equipment (proper cooling for lasers before switching off, immersion oil should not be excess, hitting the sample with expensive oil objective etc.)	very important	Yes, we are actively involved		N/A		N/A	N/A	N/A	N/A			Yes	No
181	171	1980-01-01 00:00:00	11	en	881329246	yes	Yes	Other	both cell culture and protein expression			The staff of the core facility does (the users don’t work at the core facility).	< 1MB	We produce cells and proteins, not data	1-4	1-20 users per month		Yes	Yes	Yes	Yes	No	No	No	No		Yes	We would like to improve our communication to potential new users and be more visible	No			No		No			slightly important	Yes, we are actively involved		N/A		N/A	N/A	N/A	N/A			Yes	No
182	172	1980-01-01 00:00:00	11	en	225561641	yes	Yes	genomics				Both are possible.	1-1000 GB		1-4	1-20 users per month		Yes	Yes	No	No	No	No	No	No		Yes	We intend to develop a web based platforms to get informations about the samples and plans.	No			Yes	We provide many kind of service (QPCR, NGS, RNA integrity checking), maybe it is difficult to find an optimal platform to communicate with all kind of users.	Yes	In case of the quantitative PCR (QPCR) or cell sorting we teach the users to operate those equipments. In addition, we also organize bioinformatic training using the Galaxy platform.	The goal is to train the users to operate the QPCR and the FACS machines.	important	Yes, we provide information		N/A		Yes	Yes	No	Yes			N/A	N/A
183	173	1980-01-01 00:00:00	11	en	721417309	yes	Yes	proteomics				The staff of the core facility does (the users don’t work at the core facility).	1-1000 GB		1-4	1-20 users per month		Yes	Yes	Yes	No	No	No	No	No		Yes	By organizing seminars.	No			Yes	Not at this point.	Yes		Presentations on meetings organized by our University Teaching credit courses for PhD students, who are the potential users	very important	Yes, we are actively involved		N/A		N/A	N/A	N/A	N/A			Yes	No
184	174	1980-01-01 00:00:00	11	en	867488047	yes	Yes	flow cytometry				Both are possible.	1-1000 GB		1-4	41-60 users per month		Yes	Yes	No	No	No	Yes	No	No		No		Yes	iLabs	This is fine for me	N/A		Yes		Compensation	moderately important	Yes, we are actively involved		N/A		N/A	N/A	N/A	N/A			Yes	No
185	175	1980-01-01 00:00:00	11	en	229954788	yes	Yes	genomics				The staff of the core facility does (the users don’t work at the core facility).	1-1000 TB		>16	1-20 users per month		Yes	Yes	Yes	Yes	No	Yes	Yes	Yes		Yes		Yes	supportsystems.com	ok, but can be improved	N/A		No			slightly important	Yes, we are actively involved		N/A		N/A	N/A	N/A	N/A			Yes	Yes
186	176	1980-01-01 00:00:00	11	en	1747401895	yes	Yes	Other	clinical chemistry			The staff of the core facility does (the users don’t work at the core facility).	< 1MB		1-4	1-20 users per month		Yes	Yes	Yes	No	No	No	No	No		No		No			Yes	The small volume of our core facility that provides clinical chemistry services on an automated analyser is largely manageable without dedicated software. However, a simple software platform could help us to do work in a more time-efficient manner.	No			slightly important	Yes, we provide information		N/A		Yes	Yes	No	Yes			N/A	N/A
187	180	1980-01-01 00:00:00	11	en	1597355017	yes	Yes	genomics				Both are possible.	1-1000 TB		5-8	1-20 users per month		Yes	Yes	Yes	Yes	No	No	Yes	Yes		Yes		No			Yes		Yes			important	Yes, we are actively involved		N/A		N/A	N/A	N/A	N/A			Yes	Yes
188	184	1980-01-01 00:00:00	11	en	1489473111	yes	Yes	proteomics				The staff of the core facility does (the users don’t work at the core facility).	I don’t know		>16	1-20 users per month		Yes	Yes	Yes	No	No	No	No	No		No		No			No	I'm not sure. Unless, confidentiality is guaranteed.	Yes	Representatives from various companies come at site and demonstrate the newest techniques and equipment. Also, ThermoFisher Scientific Baltic company organizes "Science Day" on annual basis. They not only demonstrate their hot topics but also provide transportation to the scientific community members from various parts of the country. Also, the selected scientists (both achieved and PhD students)…	Being familiar with the newest technologies, ability to apply them in own research, exchanging ideas, making new contacts.	very important	Yes, we provide information		N/A		Yes	No	Yes	No			N/A	N/A
189	185	1980-01-01 00:00:00	11	en	164953857	yes	Yes	crystallography				The staff of the core facility does (the users don’t work at the core facility).	1-1000 GB		1-4	1-20 users per month		Yes	Yes	Yes	No	No	Yes	Yes	No		No		Yes	proprietary system for booking of instrumental time	Mixed. An automation of processes inside the SW system is not flawless	N/A		Yes		Flawless preparation of samples (in our case crystals) for delivery to the CF	important	No	We use standard instrumentation (for single crystal X-ray diffraction), its modification is not necessary	No		N/A	N/A	N/A	N/A			N/A	N/A
190	186	1980-01-01 00:00:00	11	en	645044751	yes	Yes	Other	bioinformatics			Both are possible.	1-1000 GB		1-4	1-20 users per month		Yes	Yes	No	No	No	No	No	No		Yes	PI's are often absent from the whole process. With the PI's still need to learn a lot about the technologies and their PhDs and Post-Docs still having a smaller experience, the PI's would need to be present in the discussion for the whole process to work end-to-end.	No			Yes		Yes		It gives users the capacity to do their own data analysis.	very important	Yes, we provide information		N/A		Yes	No	No	No			N/A	N/A
191	187	1980-01-01 00:00:00	11	en	1076994571	yes	Yes	proteomics				The staff of the core facility does (the users don’t work at the core facility).	1-1000 GB		1-4	1-20 users per month		Yes	Yes	Yes	No	No	No	Yes	No		No		No			No		Yes		we do provide sample preparation training to ensure samples deliver results and are free of contamination	important	Yes, we are actively involved		N/A		N/A	N/A	N/A	N/A			Yes	No
192	188	1980-01-01 00:00:00	11	en	1754081739	yes	Yes	proteomics				The staff of the core facility does (the users don’t work at the core facility).	1-1000 GB		9-12	1-20 users per month		Yes	Yes	Yes	No	No	No	No	Yes		No		No			Yes		Yes		sample preparation	very important	Yes, we are actively involved		N/A		N/A	N/A	N/A	N/A			Yes	No
193	189	1980-01-01 00:00:00	11	en	1918814300	yes	Yes	Other	human MRI (mainly functional brain mapping)			Both are possible.	1-1000 GB		9-12	1-20 users per month		Yes	Yes	No	No	No	No	Yes	Yes		No		No			No		Yes	There are two lines - training about usage of equipment (it is relvant only for users woring in lab and for this case is mandatory) and trainigng about principles of methods, design of study, data analysisi, etc. - this is volunatry and based on some courses or worhshops	For working in lab - safety (of measured participnats, of tehcnicians/researchers, of equipment = to avoid some damage)	important	Yes, we are actively involved		N/A		N/A	N/A	N/A	N/A			Yes	No
194	190	1980-01-01 00:00:00	11	en	346787181	yes	Yes	proteomics				The staff of the core facility does (the users don’t work at the core facility).	1-1000 TB		1-4	1-20 users per month		Yes	Yes	Yes	No	No	No	No	No		Yes	Managment software	No			Yes		No			important	Yes, we provide information		N/A		Yes	No	No	No			N/A	N/A
195	191	1980-01-01 00:00:00	11	en	1412127081	yes	Yes	Other	bioinformatics			Both are possible.	1-1000 TB		13-16	61-80 users per month		Yes	Yes	No	No	No	Yes	No	Yes		No		Yes	slack		N/A		Yes		Making sure the scientists we deal with have a dataset that we can go through with them. Then the training becomes more relevant and tailored to there questions. We previously did training courses that were general but often people didnt turn up and they struggled as some of it wasn't relevant to what they were doing. So now we do one on one training and it is much better but of course this is on…	slightly important	Yes, we provide information		N/A		Yes	No	No	Yes			N/A	N/A
196	194	1980-01-01 00:00:00	11	en	2116390798	yes	Yes	proteomics				The staff of the core facility does (the users don’t work at the core facility).	1-1000 GB		9-12	21-40 users per month		Yes	Yes	Yes	No	No	Yes	No	Yes		No		Yes	our own ordering system	we are happy with that, most of users, too	N/A		No	usually not (full service mode), only how to read results, in long-term cooperations training for using of instrumentation is possible for question below important is to learn users how to interpret and use our results		very important	Yes, we provide information		N/A		Yes	No	No	Yes			N/A	N/A
197	195		10	en	394801048	yes	Yes	microscopy				Both are possible.	1-1000 GB		5-8	21-40 users per month		Yes	Yes	Yes	Yes	No	No	No	No		No		No			No	Communication face-to-face is efficient, communication trough platforms more easily resulting in misunderstanding	Yes		good quality of the sample, understanding the principles, precision, safety	important	Yes, we are actively involved		N/A		N/A	N/A	N/A	N/A			Yes	Yes
198	197		6	en	1258316308	yes	Yes	microscopy				The staff of the core facility does (the users don’t work at the core facility).	1-1000 TB		5-8	> 100 users per month		Yes	Yes	No	No	Yes	Yes	Yes	Yes		Yes	anyway which is relevant to the up and coming scientists where email is not impactful	Yes	slack	ok, but concerns about being on the cloud	N/A		Yes		testing competency	very important	Yes, we are actively involved		N/A		N/A	N/A	N/A	N/A			Yes	No
199	198	1980-01-01 00:00:00	11	en	2083444919	yes	Yes	proteomics				The staff of the core facility does (the users don’t work at the core facility).	1-1000 GB		1-4	1-20 users per month		Yes	Yes	Yes	No	No	No	No	No		No		No			Yes	not really, as long as I could have a private/ secured communication with each individual collaborators	No			very important	Yes, we are actively involved		N/A		N/A	N/A	N/A	N/A			Yes	No
200	199	1980-01-01 00:00:00	11	en	1354861827	yes	Yes	genomics				The staff of the core facility does (the users don’t work at the core facility).	1-1000 GB		9-12	21-40 users per month		Yes	Yes	Yes	Yes	Yes	Yes	Yes	No		No		Yes	RedMine	We adapted the software to our needs.	N/A		Yes	Occasional (2/year) hands_on training	Improves users' background in genomic technologies. Helps them to perform "bettter" experiments.	important	Yes, we provide information		N/A		Yes	Yes	Yes	Yes			N/A	N/A
201	200	1980-01-01 00:00:00	11	en	868439190	yes	Yes	histology				Both are possible.	1-1000 MB		1-4	1-20 users per month		Yes	Yes	Yes	Yes	No	No	Yes	No		No		No			No		Yes		To provide knowledge to the users in becoming independent later when using the particular technique.	very important	Yes, we are actively involved		N/A		N/A	N/A	N/A	N/A			Yes	Yes
202	203	1980-01-01 00:00:00	11	en	1581144413	yes	Yes	Other	MicroCT and Structural Analysis			Both are possible.	1-1000 TB	around 3 TB	1-4	1-20 users per month		Yes	Yes	Yes	No	No	No	Yes	Yes		No		Yes	Skype, Polybox	Often technikal prblems concerning the firewall settings in the hospital enviroment	N/A		Yes		Quality standards and individualized workflows	very important	Yes, we are actively involved		N/A		N/A	N/A	N/A	N/A			Yes	Yes
203	204	1980-01-01 00:00:00	11	en	858488562	yes	Yes	flow cytometry				Both are possible.	1-1000 TB		1-4	81-100 users per month		Yes	Yes	No	Yes	No	No	Yes	No		No		No			Yes		Yes			very important	Yes, we provide information		N/A		Yes	No	No	Yes			N/A	N/A
204	209	1980-01-01 00:00:00	11	en	1978768015	yes	Yes	flow cytometry				Both are possible.	1-1000 MB		1-4	41-60 users per month		Yes	Yes	Yes	Yes	No	Yes	Yes	No		No		Yes	IRIS		N/A		Yes		Understanding the principle of FACS machines.	very important	Yes, we provide information		N/A		Yes	No	Yes	Yes			N/A	N/A
205	210	1980-01-01 00:00:00	11	en	1598932664	yes	Yes	mouse				Both are possible.	1-1000 GB		1-4	1-20 users per month		Yes	Yes	Yes	No	No	No	No	No		No		No			No		Yes			very important	Yes, we are actively involved		N/A		N/A	N/A	N/A	N/A			Yes	No
206	211		10	en	32421949	yes	Yes	proteomics				Both are possible.	1-1000 GB		1-4	1-20 users per month		Yes	No	No	No	No	Yes	No	Yes		No		Yes	in house developed	very good system to provide Data	N/A		Yes		discussing protocols and data analysis	moderately important	Yes, we are actively involved		N/A		N/A	N/A	N/A	N/A			Yes	No
207	212	1980-01-01 00:00:00	11	en	1815639333	yes	Yes	proteomics				Both are possible.	1-1000 GB		1-4	1-20 users per month		Yes	Yes	Yes	Yes	No	No	No	No		No		No			Yes		Yes			important	Yes, we are actively involved		N/A		N/A	N/A	N/A	N/A			Yes	No
208	213	1980-01-01 00:00:00	11	en	1066422061	yes	Yes	mouse				The staff of the core facility does (the users don’t work at the core facility).	< 1MB		1-4	21-40 users per month		Yes	Yes	Yes	No	No	No	Yes	No		No		No			No		Yes	if requested, but not in a way that they are able to perform their experiments on their own	give the users the background to understand how to proceed with the animals generated in our facility and in addition the caretakers are trained	important	Yes, we are actively involved		N/A		N/A	N/A	N/A	N/A			Yes	No
209	215	1980-01-01 00:00:00	11	en	684966772	yes	Yes	proteomics				The staff of the core facility does (the users don’t work at the core facility).	1-1000 TB		5-8	1-20 users per month		Yes	Yes	Yes	No	No	No	No	No		No		No			No	We prefer face-to-face meetings to discuss projects in detail. In this way, users can profit best from our year-long experience and optimize their experiments to ensure optimal data quality.	Yes		Training is only provide on a theoretical basis, so that the users can understand the potential and also limitations of the techniques we use. According to our experience, "user prepared samples" are often insuffiient in quality All sample prep and instrumental analysis is performed by expert technical staff and scientific core facility personnel. We also provide detailed guidance how to evaluate…	very important	Yes, we are actively involved		N/A		N/A	N/A	N/A	N/A			Yes	Yes
210	216	1980-01-01 00:00:00	11	en	1065231456	yes	Yes	microscopy				Both are possible.	1-1000 TB		13-16	> 100 users per month		Yes	Yes	Yes	Yes	No	Yes	No	No		Yes	specialized automation and communication software / environment	Yes	Slack, custom database - robot solutions	High maintenance - but highly flexible	N/A		Yes		Scientific project related technical sound training to achieve best scientific results as basic as possible regarding the hardware	very important	Yes, we are actively involved		N/A		N/A	N/A	N/A	N/A			Yes	No
211	218	1980-01-01 00:00:00	11	en	1739311919	yes	Yes	proteomics				Both are possible.	1-1000 GB		5-8	21-40 users per month		Yes	Yes	Yes	Yes	No	Yes	Yes	Yes		Yes	Platform for sharing best practice for facility-user and user-user	No			Yes	Too many different pieces of software used by different groups so slow to take up another tool. Ideally there would be one tool used across many different areas of the university.	Yes		Adherence to protocols	very important	Yes, we are actively involved		N/A		N/A	N/A	N/A	N/A			Yes	Yes
212	219	1980-01-01 00:00:00	11	en	1004143288	yes	Yes	histology				Both are possible.	1-1000 GB		1-4	> 100 users per month		Yes	Yes	Yes	Yes	No	Yes	Yes	Yes		No		Yes	ppms	ok	N/A		Yes		One to one and time	very important	Yes, we provide information		N/A		Yes	No	Yes	Yes			N/A	N/A
213	220	1980-01-01 00:00:00	11	en	1470971132	yes	Yes	flow cytometry				Both are possible.	1-1000 GB		1-4	61-80 users per month		Yes	Yes	No	No	No	Yes	No	No		No		Yes	iLabs		N/A		Yes		Compensation	moderately important	Yes, we are actively involved		N/A		N/A	N/A	N/A	N/A			Yes	No
214	221	1980-01-01 00:00:00	11	en	335615231	yes	Yes	flow cytometry				Both are possible.	1-1000 GB		1-4	21-40 users per month		Yes	Yes	No	No	No	No	No	No		No		No			No		Yes		Making sure they underdstand how to set up an experiment and troubleshoot issues	very important	Yes, we provide information		N/A		Yes	No	Yes	Yes			N/A	N/A
215	223		6	en	2057082764	yes	Yes	Other	imaging			Both are possible.	I don’t know		>16	1-20 users per month		Yes	Yes	Yes	Yes	Yes	No	Yes	Yes		No		No			No		NA			important	Yes, we are actively involved		N/A		N/A	N/A	N/A	N/A			Yes	Yes
216	225	1980-01-01 00:00:00	11	en	907877755	yes	Yes	genomics				The staff of the core facility does (the users don’t work at the core facility).	1-1000 TB		5-8	81-100 users per month		Yes	Yes	No	Yes	No	Yes	Yes	No		Yes	the helpdesk software (Request Tracker, https://bestpractical.com/ we use primarily is really designed for IT helpdesks). Having actual conversations and tracking the conversation is quite difficult often. Something like slack or trello, but easily used for 100's of 'one-off' conversations would be ideal.	Yes	Request Tracker, https://bestpractical.com/, and the user interface of our LIMS (Clarity)	Neither is perfect.	N/A		Yes	We offer EDMs (experimental design meetings) once a week, they are bookable via a dedicated email and the user fills in information on a template document. The meeting has representation from both our genomics and bioinformatics cores.	ensuring the user is aware of multiple, often new, techniques. Understanding batch effects and good design of randomisation, including biological and technical replicates.	very important	Yes, we are actively involved		N/A		N/A	N/A	N/A	N/A			Yes	No
217	227	1980-01-01 00:00:00	11	en	2086761649	yes	Yes	histology				The staff of the core facility does (the users don’t work at the core facility).	I don’t know		1-4	21-40 users per month		Yes	Yes	No	No	No	No	No	No		Yes	with more collaboration and understanding	No			No		Yes		make the people aware about the limitations	very important	Yes, we provide information		N/A		Yes	No	No	Yes			N/A	N/A
218	229	1980-01-01 00:00:00	11	en	1743372953	yes	Yes	microscopy				Both are possible.	1-1000 TB		1-4	81-100 users per month		Yes	Yes	Yes	Yes	Yes	No	Yes	Yes		Yes	more social media Twitter etc	No			Yes	Data protection GPDR	Yes		knowledge transfer, safety	very important	Yes, we provide information		N/A		Yes	Yes	Yes	Yes			N/A	N/A
219	230	1980-01-01 00:00:00	11	en	1930295475	yes	Yes	Other	Transcript			The staff of the core facility does (the users don’t work at the core facility).	I don’t know		>16	1-20 users per month		Yes	Yes	Yes	No	No	No	Yes	No		No		No			Yes		Yes			important	Yes, we are actively involved		N/A		N/A	N/A	N/A	N/A			Yes	Yes
220	233	1980-01-01 00:00:00	11	en	1330602875	yes	Yes	NMR				The staff of the core facility does (the users don’t work at the core facility).	1-1000 MB		1-4	1-20 users per month		Yes	No	No	No	No	No	No	No		No		No			No	I perform in vivo imaging, so I need to plan the entire experiment with the users (starting from the authorization process). Each experiment is different and requires a dedicated study and preparation, so I prefer to deal personally with the users.	No			very important	Yes, we are actively involved		N/A		N/A	N/A	N/A	N/A			Yes	No
221	234	1980-01-01 00:00:00	11	en	1850776981	yes	Yes	microscopy				The users work at the core facility (you provide the infrastructure only).	1-1000 TB		1-4	21-40 users per month		Yes	Yes	No	Yes	No	No	Yes	Yes		No		No			No	problems normally too specialized - other issues can be communicated via our standard channels	Yes		applicative tests and optimization for the user's purpose	very important	Yes, we provide information		N/A		Yes	No	No	No			N/A	N/A
222	235	1980-01-01 00:00:00	11	en	1119684704	yes	Yes	microscopy				Both are possible.	1-1000 GB		1-4	21-40 users per month		Yes	Yes	Yes	No	Yes	No	No	No		No		No			Yes	For infrequent users or those staying for only a few months.	Yes		Make sure the user follows the guidelines of the facility.	very important	Yes, we are actively involved		N/A		N/A	N/A	N/A	N/A			Yes	No
223	236		8	en	1098900226	yes	Yes	pluripotent stem cells				Both are possible.	1-1000 MB		5-8	1-20 users per month		Yes	Yes	Yes	No	No	No	Yes	Yes		No		No			No		Yes		know-hows : stem cell culture is very difficult	important	Yes, we are actively involved		N/A		N/A	N/A	N/A	N/A			Yes	Yes
224	237	1980-01-01 00:00:00	11	en	464323229	yes	Yes	Other	Laser microdissection			Both are possible.	1-1000 MB	Micrographs of the excised material are taken by some users.	1-4	1-20 users per month		Yes	Yes	Yes	No	No	No	No	No		No		No			No		Yes	After training, users are allowed to work independently at the laser micro dissection system.	Making correct use of the laser microdissection setup and avoid damage of the setup by misuse.	very important	Yes, we are actively involved		N/A		N/A	N/A	N/A	N/A			Yes	Yes
225	238	1980-01-01 00:00:00	11	en	1186649044	yes	Yes	proteomics				The staff of the core facility does (the users don’t work at the core facility).	1-1000 GB		1-4	1-20 users per month		Yes	Yes	Yes	Yes	Yes	No	No	No		No		No			Yes		NA			important	Yes, we are actively involved		N/A		N/A	N/A	N/A	N/A			Yes	Yes
226	240	1980-01-01 00:00:00	11	en	1345798621	yes	Yes	Other	Sequencing - more than genomics!			The staff of the core facility does (the users don’t work at the core facility).	1-1000 MB		5-8	1-20 users per month		Yes	Yes	Yes	Yes	No	No	Yes	No		No		No			Yes	Programming such a platform according to our needs	No	Seminar, Students can work here		important	Yes, we are actively involved		N/A		N/A	N/A	N/A	N/A			Yes	Yes
227	241	1980-01-01 00:00:00	11	en	1550016707	yes	Yes	protein expression				Both are possible.	1-1000 GB		1-4	1-20 users per month		Yes	Yes	Yes	Yes	No	No	Yes	Yes		No		No			No		Yes		health and safety/lab skills	very important	Yes, we are actively involved		N/A		N/A	N/A	N/A	N/A			Yes	Yes
228	245	1980-01-01 00:00:00	11	en	765804750	yes	Yes	genomics				Both are possible.	1-1000 GB		5-8	21-40 users per month		Yes	Yes	Yes	Yes	Yes	No	No	No		Yes		No			No		Yes			very important	Yes, we provide information		N/A		Yes	Yes	No	Yes			N/A	N/A
229	246	1980-01-01 00:00:00	11	en	766515285	yes	Yes	microscopy				Both are possible.	1-1000 TB		1-4	61-80 users per month		Yes	Yes	No	No	No	No	Yes	No		No		No			No		Yes		How to get reliable data	very important	Yes, we are actively involved		N/A		N/A	N/A	N/A	N/A			Yes	No
230	247	1980-01-01 00:00:00	11	en	1981071138	yes	Yes	microscopy				Both are possible.	1-1000 TB		1-4	1-20 users per month		Yes	Yes	No	Yes	No	No	Yes	Yes		No		No			No		Yes			very important	Yes, we are actively involved		N/A		N/A	N/A	N/A	N/A			Yes	No
231	248	1980-01-01 00:00:00	11	en	562756884	yes	Yes	flow cytometry				Both are possible.	1-1000 GB		1-4	> 100 users per month		Yes	Yes	No	No	No	No	Yes	Yes	whatsapp	Yes	I'd like a website for the facility at least on the intranet where I can post communications rather than send idiotic amounts of e-mails (mail list of 127 current users with every global facility concern; individual e-mails to notify new trainees of rules and resources at least 12 - 24 per month)	No			Yes	We have too many separate website based systems to log-in to at our institution/hospital. Another log-in will just be annoying.	Yes	4 hours basic facility use training and use of analysers - too short and packed with information, whish I could have them a whole day. 3 hours of self-operated self-calibrating cell sorters. Unlimited amount of individual support until a user is comfortable using each piece of equipment.	laboratory safety and proper waste disposal (there is a separate MLI and MLII cytometry lab), basic use of user interfaces and how to get consistent results, instrument set up, using proper experimental controls, QC.	very important	Yes, we are actively involved		N/A		N/A	N/A	N/A	N/A			Yes	No
232	249	1980-01-01 00:00:00	11	en	153039700	yes	Yes	Other	Mass cytometry			The staff of the core facility does (the users don’t work at the core facility).	1-1000 TB		1-4	1-20 users per month		No	Yes	Yes	No	No	Yes	No	No		No		Yes	Custom built system	Works well	N/A		No			slightly important	Yes, we provide information		N/A		Yes	No	Yes	Yes			N/A	N/A
233	251	1980-01-01 00:00:00	11	en	915377607	yes	Yes	NMR				Both are possible.	1-1000 GB		5-8	21-40 users per month		Yes	Yes	Yes	No	No	No	Yes	Yes		No		No			Yes	Meeting in the flesh is more productive since body language, connection in 'reading between the lines', using humor etc is often lost in online meetings or e.g. Slack conversations	Yes		Safety first - no harm to instrument, sample or user	important	Yes, we provide information		N/A		Yes	No	No	Yes			N/A	N/A
234	255	1980-01-01 00:00:00	11	en	61769220	yes	Yes	Other	behavioral neuroscience			Both are possible.	1-1000 GB		5-8	1-20 users per month		Yes	Yes	No	No	No	No	No	No		No		No			No		Yes			very important	Yes, we are actively involved		N/A		N/A	N/A	N/A	N/A			Yes	No
235	256	1980-01-01 00:00:00	11	en	939706896	yes	Yes	proteomics				The staff of the core facility does (the users don’t work at the core facility).	1-1000 TB		5-8	21-40 users per month		Yes	Yes	No	Yes	No	No	No	No		Yes	Online platform for data sharing and discussion about the data.	No			Yes	Platform should be maintained. I have currently no people to do that.	Yes	Lectures, courses - I usually show lots of data from our own facility.	Make people (users, mostly molecular biologists and biochemists) aware of the possibilities of this state-of-the-art technology (i.e. proteomics).	very important	Yes, we are actively involved		N/A		N/A	N/A	N/A	N/A			Yes	No
236	261	1980-01-01 00:00:00	11	en	484615912	yes	Yes	proteomics				The staff of the core facility does (the users don’t work at the core facility).	1-1000 TB		1-4	1-20 users per month		Yes	Yes	Yes	Yes	No	No	Yes	Yes		No		No			No	Every project is uniq.	Yes	We provide a course every year	Hands on experience	moderately important	Yes, we are actively involved		N/A		N/A	N/A	N/A	N/A			Yes	Yes
237	262	1980-01-01 00:00:00	11	en	976313992	yes	Yes	Other	proteomics, mass spectrometry, protein analysis			Both are possible.	1-1000 GB		1-4	21-40 users per month		Yes	Yes	No	Yes	No	Yes	No	No		Yes	discussions (emsinars) on wider background of research topics	Yes	I-lab	just implemented	N/A		Yes		sample preparation and selections, including controls	important	Yes, we provide information		N/A		No	No	Yes	Yes			N/A	N/A
238	263	1980-01-01 00:00:00	11	en	802172768	yes	Yes	microscopy				Both are possible.	1-1000 GB		1-4	81-100 users per month		Yes	Yes	Yes	Yes	No	Yes	Yes	No		No		No			No		Yes		Sample specific training. We really try to adapt the training to the user	very important	Yes, we are actively involved		N/A		N/A	N/A	N/A	N/A			Yes	Yes
239	266	1980-01-01 00:00:00	11	en	1920198598	yes	Yes	flow cytometry				Both are possible.	1-1000 GB		1-4	1-20 users per month		Yes	Yes	Yes	No	No	Yes	Yes	Yes		Yes	social media	No			Yes	security issues	Yes		The basics of the methods and how the devices work	very important	Yes, we are actively involved		N/A		N/A	N/A	N/A	N/A			Yes	Yes
240	267		5	en	2099495407	yes	Yes	microscopy				The staff of the core facility does (the users don’t work at the core facility).	1-1000 MB		5-8	1-20 users per month		Yes	Yes	Yes	Yes	No	No	No	No		No		Yes	we transfer		N/A		No			moderately important	Yes, we are actively involved		N/A		N/A	N/A	N/A	N/A			Yes	No
241	268	1980-01-01 00:00:00	11	en	611305132	yes	Yes	Other	genomics and bioinformatics			Both are possible.	1-1000 GB		1-4	21-40 users per month		Yes	Yes	Yes	No	No	No	No	No		Yes	website communication/management software	No			Yes	Projects are often very specific.	Yes		Hands on training.	important	Yes, we are actively involved		N/A		N/A	N/A	N/A	N/A			Yes	Yes
242	269	1980-01-01 00:00:00	11	en	1620354894	yes	Yes	proteomics				Both are possible.	1-1000 GB		1-4	1-20 users per month		Yes	Yes	Yes	No	No	No	No	No		No		No			Yes	maybe a communication platform would be helpful. However I do not know how to implement that.	Yes	in the mandatory face-to-face discussion before a project is accepted we discuss the scope and possible outcome of each technique. We decide together how to process and analyze the samples. In many cases the users have to help during sample preparation.	clean sample preparation	important	Yes, we are actively involved		N/A		N/A	N/A	N/A	N/A			Yes	No
243	273	1980-01-01 00:00:00	11	en	1263482554	yes	Yes	genomics				The staff of the core facility does (the users don’t work at the core facility).	1-1000 TB		5-8	1-20 users per month		Yes	Yes	Yes	Yes	No	Yes	Yes	No		Yes		Yes	SupportSystem tickets	Ok	N/A		No			moderately important	Yes, we provide information		N/A		Yes	Yes	Yes	No			N/A	N/A
244	274	1980-01-01 00:00:00	11	en	1124065040	yes	Yes	proteomics				Both are possible.	1-1000 GB		5-8	1-20 users per month		Yes	Yes	Yes	No	No	No	Yes	Yes		Yes	A (semi)professional managment software / LIMS system would be awesome!	No			Yes	We are hardly performing standardized operation procedures, i.e. every project run at the factiliy is pretty unique in its structual form. I think it will be difficult to setup a communication platform that can accommodate all the project-specific needs and support the highly diverse sample preparation, data acquisition and data analysis workflows....	Yes	Yes, every user gets trained to the level that he/she understands the final output data (excel table) and knows how to correctly interpret the data. Extensive users often also get deeper trainings, i.e. training in how the data was acquired, how LC-MS/MS works, how the data got analyzed to reach the point of the excel table....	Making sure that the users know how to correctly interpret the data that we provide, i.e. which scientific conclsions are supported by the data and which NOT.	very important	Yes, we are actively involved		N/A		N/A	N/A	N/A	N/A			Yes	Yes
245	275	1980-01-01 00:00:00	11	en	1603041125	yes	Yes	Other	surgical models			Both are possible.	1-1000 GB		1-4	21-40 users per month		Yes	Yes	Yes	No	No	No	Yes	Yes		No		No			No		Yes	We usually integrate and exchange our competences	Welfare and animal care	important	Yes, we are actively involved		N/A		N/A	N/A	N/A	N/A			Yes	Yes
246	277	1980-01-01 00:00:00	11	en	1500136709	yes	Yes	microscopy				Both are possible.	1-1000 GB		1-4	1-20 users per month		Yes	Yes	No	Yes	No	No	Yes	Yes		No		No			No		Yes		attention to detail	very important	Yes, we provide information		N/A		Yes	No	No	Yes			N/A	N/A
247	278	1980-01-01 00:00:00	11	en	907838417	yes	Yes	Other	About 15 Core Facilities (flow cytometry, Genomics, Microscopy metabolomics...) are managed and organized and managed by a scientific commitee			Both are possible.	1-1000 MB		13-16	21-40 users per month		Yes	Yes	Yes	No	No	No	No	Yes		No		No			No		Yes		Handle the devices properly and to know, how to interpret the generated data.	very important	Yes, we are actively involved		N/A		N/A	N/A	N/A	N/A			Yes	No
248	279	1980-01-01 00:00:00	11	en	838150051	yes	Yes	microscopy				Both are possible.	1-1000 GB		1-4	41-60 users per month		Yes	Yes	Yes	No	No	No	Yes	Yes		No		No			Yes		Yes			very important	Yes, we provide information		N/A		Yes	No	Yes	Yes	seminars, workshops		N/A	N/A
249	282	1980-01-01 00:00:00	11	en	1670242617	yes	Yes	antibodies				The staff of the core facility does (the users don’t work at the core facility).	1-1000 MB		1-4	21-40 users per month		Yes	Yes	No	No	No	No	No	No		Yes		No			No		Yes			slightly important	Yes, we are actively involved		N/A		N/A	N/A	N/A	N/A			Yes	Yes
250	283	1980-01-01 00:00:00	11	en	628827567	yes	Yes	genomics				The staff of the core facility does (the users don’t work at the core facility).	I don’t know		1-4	1-20 users per month		Yes	Yes	Yes	No	No	No	No	No		Yes		No			No		Yes			important	Yes, we provide information		N/A		Yes	No	No	Yes			N/A	N/A
251	284	1980-01-01 00:00:00	11	en	1817444957	yes	Yes	microscopy				Both are possible.	1-1000 GB		1-4	1-20 users per month		Yes	Yes	No	No	No	No	No	No		Yes	by social media (Twitter)	No			Yes	NO	Yes		Microscopy Fundamental concepts and understanding the technique	very important	Yes, we provide information		N/A		Yes	No	No	No			N/A	N/A
252	285	1980-01-01 00:00:00	11	en	1092600706	yes	Yes	microscopy				The users work at the core facility (you provide the infrastructure only).	1-1000 TB		5-8	> 100 users per month		Yes	Yes	No	Yes	No	No	Yes	Yes	booking system	Yes	- make them read the 1 single email that contains all relevant email - weekly facility walk-in hour (for any kind of questions)	No			No	we use a booking system, website and email. the obsticale would be too many platforms. one could consider to move communication from email and booking system into an ticket-tracker system however	Yes		collect data that you can quantify (pre-)define the process or feature that you want to quantify!	very important	Yes, we provide information		N/A		No	No	No	No	actively involved on demain - on all available platforms		N/A	N/A
253	287	1980-01-01 00:00:00	11	en	1748099423	yes	Yes	microscopy				Both are possible.	1-1000 GB		5-8	21-40 users per month		Yes	Yes	Yes	No	No	No	No	No		No		No			Yes	There are so many platforms already available that People are reluctant to use an additional one.	Yes			very important	Yes, we provide information		N/A		Yes	Yes	Yes	Yes			N/A	N/A
254	288	1980-01-01 00:00:00	11	en	1899407901	yes	Yes	cell culture				The staff of the core facility does (the users don’t work at the core facility).	< 1MB		>16	> 100 users per month		Yes	Yes	Yes	No	No	No	No	Yes		No		Yes	Service Now	We focus on communication, it is key to delivering a professional service	N/A		Yes		Teaching good practice for cell culutre	important	Yes, we provide information		N/A		Yes	No	No	Yes			N/A	N/A
255	289		7	en	1787263382	yes	Yes	Other	metabolomics			The staff of the core facility does (the users don’t work at the core facility).	1-1000 GB		5-8	1-20 users per month		Yes	Yes	Yes	Yes	No	Yes	Yes	No		No		Yes	OpenIris	Phone calls, emails and face to face communication always outperform management software, except in the criteria of making sure noone is forgotten.	N/A		Yes	The people who would benefit most from the training tend not to attend.	Good experimental design to maximise successful outcome.	very important	Yes, we are actively involved		N/A		N/A	N/A	N/A	N/A			Yes	Yes
256	291		7	en	469876785	yes	Yes	flow cytometry				Both are possible.	1-1000 GB		5-8	21-40 users per month		Yes	Yes	Yes	Yes	No	No	Yes	No		Yes	staff dedicated to contacts with users	No			Yes	It could be, much it depends on the organizzation of the entire structure where the core facility is embedded. It would be preferable to use traceable and archivable communication systems.	Yes		To organize theoretical courses of flow cytometry and then training courses on instruments. After this, to select users able to correctly follow the procedures of setup and maintenance.	very important	Yes, we are actively involved		N/A		N/A	N/A	N/A	N/A			Yes	Yes
257	292	1980-01-01 00:00:00	11	en	1849183905	yes	Yes	flow cytometry				Both are possible.	1-1000 GB		1-4	41-60 users per month		Yes	Yes	Yes	No	No	No	Yes	No		No		No			No		Yes		keep instrument in a clean and functional state use right instrument settings use good controls	very important	Yes, we are actively involved		N/A		N/A	N/A	N/A	N/A			Yes	Yes
258	294	1980-01-01 00:00:00	11	en	1278768653	yes	Yes	flow cytometry				The users work at the core facility (you provide the infrastructure only).	1-1000 GB		1-4	61-80 users per month		Yes	Yes	Yes	Yes	No	No	No	No		Yes	User Group Meetings	No			No		Yes		Sample preparation	very important	Yes, we provide information		N/A		Yes	No	No	Yes			N/A	N/A
259	295	1980-01-01 00:00:00	11	en	1514158104	yes	Yes	genomics				The staff of the core facility does (the users don’t work at the core facility).	1-1000 TB		13-16	21-40 users per month		Yes	Yes	Yes	Yes	No	No	Yes	No		No		No			No		Yes		Understand and interprete the QC at each experimental step	very important	Yes, we are actively involved		N/A		N/A	N/A	N/A	N/A			Yes	Yes
260	296	1980-01-01 00:00:00	11	en	1572833966	yes	Yes	microscopy				Both are possible.	1-1000 GB		1-4	1-20 users per month		Yes	Yes	Yes	Yes	No	No	Yes	No		Yes	More advertising in intranet and other internal ways of university and hospital.	No			Yes	People need to know how to contact you, it has to be easy and without installing a program oder app. Support may need time and might be good for bigger core facilities, for smaller ones it might be more work than help.	Yes		- how do my samples have to be prepared BEFORE coming - what is possible/ where are the limitations - which results may I get - how to operate the instruments - how to interpret the results - which problems of over interpreting might occur	very important	Yes, we provide information		N/A		Yes	Yes	Yes	Yes			N/A	N/A
261	297	1980-01-01 00:00:00	11	en	975354054	yes	Yes	proteomics				The staff of the core facility does (the users don’t work at the core facility).	1-1000 TB		9-12	41-60 users per month		Yes	Yes	Yes	No	No	No	Yes	No		No		Yes	LIMS	direct communication works best, but is most time consuming	N/A		NA	only rarely in form of students courses		moderately important	Yes, we are actively involved		N/A		N/A	N/A	N/A	N/A			Yes	Yes
262	298	1980-01-01 00:00:00	11	en	77448507	yes	Yes	microscopy				Both are possible.	1-1000 TB		1-4	41-60 users per month		Yes	Yes	Yes	Yes	No	Yes	Yes	Yes		Yes	Establishing standard procedures to ensure that, when techniques are required that the facility offers, the facility gets involved early during project planning.	No			Yes		Yes		Basic understanding what a technique can do and a technique can't do.	very important	Yes, we are actively involved		N/A		N/A	N/A	N/A	N/A			Yes	No
263	301	1980-01-01 00:00:00	11	en	754969766	yes	Yes	flow cytometry				Both are possible.	I don’t know		1-4	41-60 users per month		Yes	Yes	Yes	No	No	No	Yes	No		Yes		No			Yes		Yes		Quality assurance	very important	Yes, we provide information		N/A		Yes	No	Yes	No			N/A	N/A
264	303	1980-01-01 00:00:00	11	en	1686500292	yes	Yes	microscopy				The staff of the core facility does (the users don’t work at the core facility).	1-1000 GB		1-4	1-20 users per month		Yes	Yes	Yes	No	No	Yes	No	No		No		No			Yes		Yes			slightly important	Yes, we are actively involved		N/A		N/A	N/A	N/A	N/A			Yes	Yes
265	304	1980-01-01 00:00:00	11	en	1383372511	yes	Yes	microscopy				Both are possible.	1-1000 TB		5-8	21-40 users per month		Yes	Yes	Yes	Yes	Yes	No	Yes	Yes		No		No			No		Yes		People should really understand what they do.	very important	Yes, we are actively involved		N/A		N/A	N/A	N/A	N/A			Yes	Yes
266	305	1980-01-01 00:00:00	11	en	180863015	yes	Yes	flow cytometry				Both are possible.	1-1000 GB		1-4	> 100 users per month		Yes	Yes	Yes	No	No	Yes	Yes	No		No		No			Yes		NA			important	Yes, we provide information		N/A		Yes	Yes	Yes	Yes			N/A	N/A
267	309	1980-01-01 00:00:00	11	en	1410430968	yes	Yes	Other	mri			Both are possible.	1-1000 GB		5-8	21-40 users per month		Yes	Yes	Yes	No	No	No	Yes	Yes		No		No			No	Yes, I do see obstacles every day. We are inside a hospital network and barely able to use services of the university computer center.	Yes		Safety of subjects and staff members.	very important	Yes, we are actively involved		N/A		N/A	N/A	N/A	N/A			Yes	No
268	310	1980-01-01 00:00:00	11	en	1705137527	yes	Yes	genomics				The staff of the core facility does (the users don’t work at the core facility).	1-1000 TB		9-12	41-60 users per month		Yes	Yes	Yes	No	No	No	No	No		Yes	The communication with the users would improve with a communication software.	No			Yes	No.	No			moderately important	Yes, we are actively involved		N/A		N/A	N/A	N/A	N/A			Yes	No
269	311	1980-01-01 00:00:00	11	en	1080507197	yes	Yes	Other	recombinant viruses			The staff of the core facility does (the users don’t work at the core facility).	I don’t know	We are producing biological material. It has nothing to do with bioinformatic or digital data.	1-4	1-20 users per month		Yes	Yes	Yes	No	No	No	No	No		No		No			No	No	NA	Not applicable. Usually, we provide training if a user specifically asks for. We do not do it on a regular basis.		unimportant	Yes, we provide information		N/A		Yes	No	Yes	Yes			N/A	N/A
270	312	1980-01-01 00:00:00	11	en	2048760777	yes	Yes	genomics				Both are possible.	1-1000 MB		1-4	> 100 users per month		Yes	Yes	Yes	Yes	No	No	No	No		Yes	Greater faculty enggment with research facilities	No			Yes	Staff knowledge lacking and investment of time to develop.	Yes		Safe use of equipment	important	Yes, we are actively involved		N/A		N/A	N/A	N/A	N/A			Yes	Yes
271	316	1980-01-01 00:00:00	11	en	1393424017	yes	Yes	proteomics				Both are possible.	1-1000 MB		1-4	1-20 users per month		Yes	Yes	No	No	No	No	No	No		No		No			Yes		No	Most of time no, but if there are users that heavily use MS-proteomics, then yes, we do train them to do sample preparation for MS analysis. For the data analysis we give users the option to be trained or not with the data analysis software,		moderately important	Yes, we are actively involved		N/A		N/A	N/A	N/A	N/A			Yes	No
272	317	1980-01-01 00:00:00	11	en	1781393289	yes	Yes	Other	DNA sequencing			The staff of the core facility does (the users don’t work at the core facility).	1-1000 GB		1-4	1-20 users per month		Yes	Yes	Yes	No	No	Yes	No	Yes		No		Yes	One way communication (CF > user). Project tracking system (TraqBio).		N/A		Yes		Introducing handling of sequencing/preparation devices.	very important	Yes, we provide information		N/A		Yes	Yes	Yes	Yes			N/A	N/A
273	318	1980-01-01 00:00:00	11	en	1842906231	yes	Yes	Other	neurobehavior			The staff of the core facility does (the users don’t work at the core facility).	I don’t know		5-8	1-20 users per month		Yes	Yes	Yes	No	No	No	No	Yes		No		No			No		NA	it depends		very important	Yes, we provide information		N/A		Yes	Yes	Yes	Yes			N/A	N/A
274	321	1980-01-01 00:00:00	11	en	1395179536	yes	Yes	mouse				The staff of the core facility does (the users don’t work at the core facility).	I don’t know		>16	1-20 users per month		Yes	Yes	Yes	No	No	No	Yes	No		No		No			No		Yes		To convey the importance of compliance with trained study designs, protocols and procedures.	very important	Yes, we are actively involved		N/A		N/A	N/A	N/A	N/A			Yes	Yes
275	322	1980-01-01 00:00:00	11	en	1410855235	yes	Yes	mouse				Both are possible.	1-1000 GB		1-4	1-20 users per month		Yes	Yes	No	No	No	No	Yes	Yes		Yes	Communication can and should always be improved! The main issue to be always informed and up-to-date, in both directions (user <-> facility)	No			Yes		Yes		Verifying that the users possess sufficient skills in handling the animals and understanding the protocols for their experiment, also emphasizing the work culture and good practice in all situations, especially in case of uncertainties - where and when to seek for help	very important	Yes, we are actively involved		N/A		N/A	N/A	N/A	N/A			Yes	No
276	324	1980-01-01 00:00:00	11	en	1080957171	yes	Yes	microscopy				Both are possible.	1-1000 TB		1-4	21-40 users per month		Yes	Yes	Yes	No	No	No	Yes	No		No		No			No		Yes		that it is individual for the questions the user wants to answer by doing microscopy	very important	Yes, we are actively involved		N/A		N/A	N/A	N/A	N/A			Yes	Yes
	closed
[truncated: 169 more columns]

## Sheet: 1
	core facility specialization	core facility specialization	full service?	users work here?	Experiments performed by:	data per month	Comment	number of employees	users per month	users per month		core facility specialization			Experiments performed by:	all	flow cytometry	genomics	histology	metabolomics	microscopy	mouse/rat	protein expression	proteomics		data per month	all	flow cytometry	genomics	histology	metabolomics	microscopy	mouse/rat	protein expression	proteomics		# employees	all	flow cytometry	genomics	histology	metabolomics	microscopy	mouse/rat	protein expression	proteomics		users per month	all
1	crystallography		Yes	Yes	both	1-1000 MB		1-4	21-40	40		antibodies	1		core facility staff	73	3	15	2	3	5	6	3	23		< 1MB	8	0	1	0	0	0	1	1	0		1-4	182	41	13	8	5	48	11	6	20		1-20	128
2	microscopy		Yes	Yes	both	1-1000 TB		1-4	1-20	3-5		bioinformatics	6		both	175	40	17	8	4	49	7	5	12		1-1000 MB	40	8	5	1	2	3	2	3	1		5-8	54	6	12	1	3	10	3	2	9		21-40	64
3	Other	Biophysics	Yes	Yes	both	1-1000 MB	The data we generate does not require a lot of space since most of the files are tab -delimited text files.	1-4	1-20	20		cell culture	5		user only	28	7	1	1	1	9	3	0	0		1-1000 GB	100	25	8	1	4	24	4	2	18		9-12	17	2	3	2	0	1	0	0	4		41-60	34
4	pluripotent stem cells	pluripotent stem cells	Yes	Yes	both	< 1MB		1-4	1-20	10		crystallography	2													1-1000 TB	86	7	17	2	2	34	1	0	15		13-16	8	1	2	0	0	2	0	0	1		61-80	12
5	microscopy		Yes	Yes	both	1-1000 GB		1-4	1-20	20		flow cytometry	50		full-service	73	3	15	2	3	5	6	3	23		I don’t know	42	10	2	7	0	2	8	2	1		>16	15	0	3	0	0	2	2	0	1		81-100	10
6	proteomics		Yes	Yes	both	1-1000 TB		1-4	1-20	10		genomics	33		hybrid-service	175	40	17	8	4	49	7	5	12		1-1000 PB	0	0	0	0	0	0	0	0	0			276										>100	28
7	Other	transgenic technology	No	Yes	users work	I don’t know	Not applicable!!!	1-4	1-20	3		histology	11		self-service	28	7	1	1	1	9	3	0	0			276																						276
8	bioinformatics	Data management/Bioinformatics	Yes	Yes	both	1-1000 TB		>16	1-20	10		metabolomics	8
9	microscopy		No	Yes	users work	1-1000 TB		1-4	61-80	70		microscopy	63
10	microscopy	preclinical In vivo imaging (MRI, CT, multi-photon, PET)	Yes	Yes	both	1-1000 TB		1-4	41-60	60		mouse / rat	16
11	microscopy		No	Yes	users work	1-1000 TB		1-4	41-60	58		NMR	4
12	Other	lipidomics	Yes	Yes	both	1-1000 MB	This depends on the acquisition modes - we perform more targeted then untargeted analysis and thus the data size is much lower but the number of projects is fairly significant	5-8	1-20	10 on average		pluripotent stem cells	3
13	flow cytometry		No	Yes	users work	1-1000 GB		1-4	> 100	150		protein expression	8
14	Other	Chemical Biology	Yes	No	staff	1-1000 MB		9-12	1-20	1-2		proteomics	35
15	Histology	histology	Yes	Yes	both	1-1000 TB		5-8	> 100	125		Other	31
16	genomics		Yes	Yes	both	1-1000 TB		5-8	41-60	50			276
17	cell culture		No	Yes	users work	I don’t know		1-4	> 100	100-120
18	genomics		No	No	staff	1-1000 TB		1-4	1-20	20
19	mouse		No	Yes	users work	I don’t know		1-4	21-40	30
20	mouse	Behavioural Analysis	Yes	Yes	both	I don’t know		5-8	1-20	3-5
21	mouse		Yes	No	staff	1-1000 MB		1-4	21-40	40
22	protein expression		Yes	No	staff	1-1000 MB		5-8	1-20	15
23	genomics		Yes	Yes	both	1-1000 TB		1-4	1-20	5
24	bioinformatics	bioinformatics	No	Yes	users work	1-1000 TB		1-4	1-20	3																1-1000 PB	0
25	genomics		No	Yes	users work	I don’t know		1-4	> 100	100
26	proteomics		Yes	No	staff	1-1000 TB		1-4	21-40	30
27	metabolomics		No	Yes	users work	1-1000 TB		1-4	1-20	10-20
28	metabolomics		Yes	No	staff	1-1000 MB		5-8	1-20	12
29	Other	CRISPR	Yes	Yes	both	1-1000 MB		>16	21-40	35
30	metabolomics		Yes	Yes	both	1-1000 TB		1-4	1-20	up to 10
31	mouse		No	No	staff	1-1000 MB		1-4	21-40	35
32	genomics		Yes	Yes	both	1-1000 TB		5-8	21-40	35
33	flow cytometry		Yes	Yes	both	1-1000 TB		1-4	61-80	61
34	mouse	mouse, rat, zebrafish behavior	No	Yes	users work	1-1000 TB	Most data are video recordings of animals	1-4	1-20	4-10
35	proteomics		Yes	Yes	both	1-1000 TB		1-4	1-20	20
36	flow cytometry	flow cytometry and mass cytometry	No	No	staff	1-1000 TB	raw data from mass cytometry flow cytometry only would be < 300 GB/month	1-4	21-40	20-30
37	proteomics		Yes	Yes	both	1-1000 TB		5-8	1-20	15
38	microscopy		No	Yes	users work	1-1000 TB		1-4	> 100	140/ active users per month (November 2019) , total number of users - cca 240/ per year
39	proteomics		Yes	No	staff	1-1000 TB		1-4	1-20	5-15
40	proteomics		Yes	No	staff	1-1000 GB	There is a gap in your list of choices from 1 GB to 1 TB	5-8	1-20	10-15
41	microscopy		No	Yes	users work	1-1000 GB	1-1000 GB is unfortunately missing	1-4	41-60	60
42	pluripotent stem cells	pluripotent stem cells	No	Yes	users work	1-1000 GB	several GB	5-8	1-20	20
43	Other	preclinical pharmacology	Yes	Yes	both	I don’t know		>16	21-40	This is variable, let say between 20 and 30.
44	flow cytometry		Yes	No	staff	1-1000 MB		1-4	21-40	20 +
45	proteomics		Yes	No	staff	1-1000 TB		9-12	41-60	50
46	Other	Research Instrumentation and Cell Services	No	Yes	users work	1-1000 TB		5-8	> 100	We have 380 users per year and usage varies, but on average ~32 / month
47	cell culture		Yes	Yes	both	1-1000 MB		1-4	1-20	12
48	microscopy		Yes	Yes	both	1-1000 TB		5-8	1-20	10
49	Histology	Histopathology	Yes	Yes	both	I don’t know		1-4	1-20	7
50	flow cytometry		No	Yes	users work	1-1000 MB		1-4	21-40	30
51	genomics		Yes	Yes	both	1-1000 MB		1-4	1-20	10
52	Other	a multilevel support through cell phenotyping and molecular profiling	No	Yes	users work	I don’t know		9-12	> 100	>100
53	mouse		Yes	Yes	both	I don’t know		>16	21-40	20-50, varies a lot as full service is provided (meaning user does not need to access the facility necessarily at all)
54	Histology	Histology	Yes	Yes	both	I don’t know		1-4	41-60	50
55	Histology	Histology	No	Yes	users work	1-1000 TB		9-12	41-60	~60 users mostly using us as a service, some booking equipment
56	microscopy		Yes	Yes	both	1-1000 TB		5-8	> 100	220, but this questions is not clear to answer (different users?) There are often users coming multiple times per month.
57	microscopy		Yes	Yes	both	1-1000 TB		1-4	1-20	15
58	proteomics		No	No	staff	1-1000 TB		1-4	1-20	10
59	flow cytometry		No	Yes	users work	1-1000 MB		1-4	21-40	30
60	flow cytometry		Yes	Yes	both	1-1000 TB		1-4	21-40	30
61	proteomics				The staff of the core facility does (the users don’t work at the core facility).	1-1000 TB	The amount of data produced depends on analyses performed. In cases when more imaging analyses is done, the amount of data surges.	1-4	1-20 users per month
62	microscopy				The users work at the core facility (you provide the infrastructure only).	1-1000 TB		1-4	41-60 users per month
63	microscopy				Both are possible.	1-1000 TB		13-16	81-100 users per month
64	genomics				The staff of the core facility does (the users don’t work at the core facility).	1-1000 TB		5-8	1-20 users per month
65	protein expression				The staff of the core facility does (the users don’t work at the core facility).	1-1000 MB		1-4	1-20 users per month
66	Other	in vivo bioluminescence/ fluorescence in small animal			The staff of the core facility does (the users don’t work at the core facility).	< 1MB		1-4	1-20 users per month
67	Other	Several of the above			Both are possible.	1-1000 GB	Rough Estimate	>16	21-40 users per month
68	mouse				The staff of the core facility does (the users don’t work at the core facility).	I don’t know		1-4	1-20 users per month
69	microscopy				Both are possible.	1-1000 TB		>16	> 100 users per month
70	microscopy				The staff of the core facility does (the users don’t work at the core facility).	1-1000 GB		1-4	21-40 users per month
71	flow cytometry				Both are possible.	1-1000 GB		1-4	21-40 users per month
72	microscopy				Both are possible.	1-1000 TB		1-4	81-100 users per month
73	genomics				Both are possible.	1-1000 GB		1-4	1-20 users per month
74	genomics				Both are possible.	< 1MB		1-4	1-20 users per month
75	genomics				Both are possible.	1-1000 TB		5-8	> 100 users per month
76	Other	Chemical Biology			The staff of the core facility does (the users don’t work at the core facility).	1-1000 MB		9-12	1-20 users per month
77	proteomics				Both are possible.	1-1000 GB		5-8	21-40 users per month
78	flow cytometry				Both are possible.	1-1000 GB		1-4	21-40 users per month
79	genomics	Sequencing			The staff of the core facility does (the users don’t work at the core facility).	1-1000 MB		5-8	1-20 users per month
80	flow cytometry				Both are possible.	I don’t know	variable, users have to Transfer their data from analyzer immediately	1-4	41-60 users per month
81	Other	Medicinal chemistry, peptide synthesis, small molecule synthesis			The staff of the core facility does (the users don’t work at the core facility).	I don’t know	We produce compounds not data.	1-4	1-20 users per month
82	bioinformatics	Bioinformatics			Both are possible.	1-1000 TB		1-4	21-40 users per month
83	Other	lipidomics			The staff of the core facility does (the users don’t work at the core facility).	1-1000 GB		1-4	1-20 users per month
84	microscopy	electron microscopy			Both are possible.	1-1000 TB	large 3 d data sets	1-4	21-40 users per month
85	Other	human studies			Both are possible.	1-1000 MB		1-4	1-20 users per month
86	microscopy				Both are possible.	1-1000 TB		>16	> 100 users per month
87	protein expression	cell culture, protein expression and purification			Both are possible.	1-1000 MB		1-4	1-20 users per month
88	flow cytometry				Both are possible.	1-1000 GB		1-4	41-60 users per month
89	microscopy				Both are possible.	1-1000 GB		1-4	21-40 users per month
90	flow cytometry				The users work at the core facility (you provide the infrastructure only).	I don’t know		1-4	21-40 users per month
91	mouse				Both are possible.	I don’t know		1-4	1-20 users per month
92	microscopy				Both are possible.	1-1000 GB		1-4	41-60 users per month
93	histology				Both are possible.	I don’t know		1-4	1-20 users per month
94	microscopy				Both are possible.	1-1000 TB		1-4	1-20 users per month
95	flow cytometry				Both are possible.	1-1000 TB		1-4	> 100 users per month
96	proteomics				The staff of the core facility does (the users don’t work at the core facility).	1-1000 GB		1-4	21-40 users per month
97	bioinformatics	bioinformatics			Both are possible.	1-1000 TB		1-4	21-40 users per month
98	genomics				The staff of the core facility does (the users don’t work at the core facility).	1-1000 TB		9-12	21-40 users per month
99	microscopy				Both are possible.	1-1000 GB		1-4	1-20 users per month
100	Other	zebrafish			Both are possible.	I don’t know	We provide the zebrafish for injections or different analyses. Therefore we dont produce that much data. Only Microscope images which warry from fluorescent pictures which are small too two photon imaging and light sheed which are bigger.	1-4	1-20 users per month
101	genomics				Both are possible.	1-1000 TB		13-16	> 100 users per month
102	protein expression				Both are possible.	1-1000 GB		5-8	21-40 users per month
103	histology				Both are possible.	I don’t know		1-4	1-20 users per month
104	cell culture				Both are possible.	I don’t know		1-4	> 100 users per month
105	microscopy				The staff of the core facility does (the users don’t work at the core facility).	1-1000 MB		1-4	1-20 users per month
106	genomics	functional genomics			Both are possible.	1-1000 MB		>16	21-40 users per month
107	protein expression				Both are possible.	I don’t know		1-4	1-20 users per month
108	microscopy				Both are possible.	1-1000 GB		1-4	41-60 users per month
109	metabolomics				The staff of the core facility does (the users don’t work at the core facility).	1-1000 MB		1-4	1-20 users per month
110	flow cytometry				Both are possible.	1-1000 GB		1-4	> 100 users per month
111	genomics				Both are possible.	1-1000 TB		5-8	1-20 users per month
112	microscopy				Both are possible.	1-1000 TB		9-12	41-60 users per month
113	flow cytometry				Both are possible.	1-1000 GB		1-4	41-60 users per month
114	flow cytometry				Both are possible.	I don’t know		5-8	> 100 users per month
115	microscopy				Both are possible.	1-1000 GB		1-4	1-20 users per month
116	metabolomics				Both are possible.	1-1000 GB		1-4	1-20 users per month
117	flow cytometry				Both are possible.	1-1000 GB	Mass Cytometry included	5-8	41-60 users per month
118	genomics				The staff of the core facility does (the users don’t work at the core facility).	1-1000 TB		>16	81-100 users per month
119	microscopy				Both are possible.	1-1000 GB		1-4	61-80 users per month
120	proteomics				The staff of the core facility does (the users don’t work at the core facility).	1-1000 GB		5-8	1-20 users per month
121	microscopy				Both are possible.	1-1000 GB		1-4	1-20 users per month
122	Other	Microcalorimetry - SPR			Both are possible.	1-1000 GB		1-4	1-20 users per month
123	Other	Molecular Biophysics			Both are possible.	1-1000 GB		5-8	21-40 users per month
124	histology				The staff of the core facility does (the users don’t work at the core facility).	I don’t know		1-4	1-20 users per month
125	proteomics				Both are possible.	1-1000 TB		13-16	> 100 users per month
126	flow cytometry				The users work at the core facility (you provide the infrastructure only).	I don’t know	User data are not accessible to us, we provide server infrastructure for data processing and data analysis, probably our it support could read out the amount of data on the server at one day.	5-8	41-60 users per month
127	microscopy				Both are possible.	1-1000 TB		1-4	41-60 users per month
128	microscopy				Both are possible.	1-1000 GB		1-4	81-100 users per month
129	microscopy				Both are possible.	1-1000 GB		1-4	21-40 users per month
130	flow cytometry				Both are possible.	1-1000 GB		1-4	61-80 users per month
131	flow cytometry				Both are possible.	I don’t know		13-16	> 100 users per month
132	flow cytometry				Both are possible.	1-1000 GB		1-4	21-40 users per month
133	genomics				The staff of the core facility does (the users don’t work at the core facility).	1-1000 GB		1-4	21-40 users per month
134	microscopy				Both are possible.	1-1000 MB		1-4	1-20 users per month
135	mouse	behavior			The users work at the core facility (you provide the infrastructure only).	1-1000 GB		1-4	1-20 users per month
136	microscopy				Both are possible.	1-1000 GB		1-4	1-20 users per month
137	flow cytometry				Both are possible.	I don’t know		1-4	1-20 users per month
138	flow cytometry				Both are possible.	1-1000 MB		1-4	1-20 users per month
139	metabolomics				Both are possible.	1-1000 GB		1-4	21-40 users per month
140	microscopy				Both are possible.	1-1000 TB		1-4	1-20 users per month
141	flow cytometry				Both are possible.	1-1000 GB		9-12	> 100 users per month
142	Other	mass cytometry and bioinformatics			Both are possible.	1-1000 GB		9-12	> 100 users per month
143	flow cytometry				The users work at the core facility (you provide the infrastructure only).	1-1000 GB		1-4	41-60 users per month
144	Other	MRI, CT, ultrasound, PET, SPECT, optical imaging, photoacoustics			Both are possible.	1-1000 GB		1-4	1-20 users per month
145	protein expression				Both are possible.	I don’t know		1-4	41-60 users per month
146	flow cytometry				Both are possible.	I don’t know		1-4	21-40 users per month
147	flow cytometry				Both are possible.	I don’t know		5-8	41-60 users per month
148	microscopy				The users work at the core facility (you provide the infrastructure only).	1-1000 TB	probably 1 - 10 TB	1-4	61-80 users per month
149	NMR				Both are possible.	1-1000 MB		1-4	1-20 users per month
150	microscopy				Both are possible.	I don’t know		1-4	1-20 users per month
151	flow cytometry				Both are possible.	1-1000 GB		1-4	81-100 users per month
152	flow cytometry				Both are possible.	1-1000 GB		1-4	1-20 users per month
153	proteomics				The staff of the core facility does (the users don’t work at the core facility).	1-1000 GB		1-4	21-40 users per month
154	flow cytometry				Both are possible.	I don’t know		5-8	1-20 users per month
155	flow cytometry				Both are possible.	1-1000 MB		1-4	1-20 users per month
156	microscopy				Both are possible.	1-1000 TB	Wildly variable and we don't keep records - users are responsible for their own data & back up but about 2Tb	1-4	41-60 users per month
157	flow cytometry				Both are possible.	1-1000 TB		1-4	41-60 users per month
158	flow cytometry				Both are possible.	1-1000 GB		1-4	41-60 users per month
159	microscopy				Both are possible.	1-1000 TB		5-8	41-60 users per month
160	mouse				Both are possible.	I don’t know		1-4	21-40 users per month
161	histology				Both are possible.	I don’t know		9-12	21-40 users per month
162	Other	biosamples			The staff of the core facility does (the users don’t work at the core facility).	< 1MB		5-8	1-20 users per month
163	microscopy				Both are possible.	1-1000 TB		1-4	1-20 users per month
164	NMR				Both are possible.	1-1000 GB		1-4	1-20 users per month
165	metabolomics				Both are possible.	1-1000 GB	In general metabolomics data is not a huge concern compared to other platforms/facilities. This will change in the future as mass spectrometry experiments become more detailed, or if mass spec imaging is employed.	5-8	61-80 users per month
166	flow cytometry				Both are possible.	1-1000 GB		9-12	41-60 users per month
167	flow cytometry				Both are possible.	1-1000 MB		1-4	61-80 users per month
168	cell culture				Both are possible.	1-1000 MB		1-4	1-20 users per month
169	genomics				Both are possible.	1-1000 GB		1-4	21-40 users per month
170	microscopy				The users work at the core facility (you provide the infrastructure only).	I don’t know		1-4	81-100 users per month
171	Other	High Throughput Screening			Both are possible.	1-1000 TB		1-4	21-40 users per month
172	proteomics				The staff of the core facility does (the users don’t work at the core facility).	1-1000 GB		5-8	21-40 users per month
173	microscopy				Both are possible.	1-1000 TB		5-8	61-80 users per month
174	flow cytometry				Both are possible.	1-1000 GB		1-4	1-20 users per month
175	genomics				Both are possible.	1-1000 TB		5-8	1-20 users per month
176	microscopy				Both are possible.	1-1000 TB		1-4	41-60 users per month
177	microscopy	electron microscopy			Both are possible.	1-1000 GB		1-4	1-20 users per month
178	flow cytometry				Both are possible.	1-1000 MB		1-4	1-20 users per month
179	proteomics				The staff of the core facility does (the users don’t work at the core facility).	1-1000 TB		1-4	1-20 users per month
180	microscopy				Both are possible.	1-1000 GB		1-4	21-40 users per month
181	protein expression	both cell culture and protein expression			The staff of the core facility does (the users don’t work at the core facility).	< 1MB	We produce cells and proteins, not data	1-4	1-20 users per month
182	genomics				Both are possible.	1-1000 GB		1-4	1-20 users per month
183	proteomics				The staff of the core facility does (the users don’t work at the core facility).	1-1000 GB		1-4	1-20 users per month
184	flow cytometry				Both are possible.	1-1000 GB		1-4	41-60 users per month
185	genomics				The staff of the core facility does (the users don’t work at the core facility).	1-1000 TB		>16	1-20 users per month
186	Other	clinical chemistry			The staff of the core facility does (the users don’t work at the core facility).	< 1MB		1-4	1-20 users per month
187	genomics				Both are possible.	1-1000 TB		5-8	1-20 users per month
188	proteomics				The staff of the core facility does (the users don’t work at the core facility).	I don’t know		>16	1-20 users per month
189	crystallography				The staff of the core facility does (the users don’t work at the core facility).	1-1000 GB		1-4	1-20 users per month
190	bioinformatics	bioinformatics			Both are possible.	1-1000 GB		1-4	1-20 users per month
191	proteomics				The staff of the core facility does (the users don’t work at the core facility).	1-1000 GB		1-4	1-20 users per month
192	proteomics				The staff of the core facility does (the users don’t work at the core facility).	1-1000 GB		9-12	1-20 users per month
193	Other	human MRI (mainly functional brain mapping)			Both are possible.	1-1000 GB		9-12	1-20 users per month
194	proteomics				The staff of the core facility does (the users don’t work at the core facility).	1-1000 TB		1-4	1-20 users per month
195	bioinformatics	bioinformatics			Both are possible.	1-1000 TB		13-16	61-80 users per month
196	proteomics				The staff of the core facility does (the users don’t work at the core facility).	1-1000 GB		9-12	21-40 users per month
197	microscopy				Both are possible.	1-1000 GB		5-8	21-40 users per month
198	microscopy				The staff of the core facility does (the users don’t work at the core facility).	1-1000 TB		5-8	> 100 users per month
199	proteomics				The staff of the core facility does (the users don’t work at the core facility).	1-1000 GB		1-4	1-20 users per month
200	genomics				The staff of the core facility does (the users don’t work at the core facility).	1-1000 GB		9-12	21-40 users per month
201	histology				Both are possible.	1-1000 MB		1-4	1-20 users per month
202	Other	MicroCT and Structural Analysis			Both are possible.	1-1000 TB	around 3 TB	1-4	1-20 users per month
203	flow cytometry				Both are possible.	1-1000 TB		1-4	81-100 users per month
204	flow cytometry				Both are possible.	1-1000 MB		1-4	41-60 users per month
205	mouse				Both are possible.	1-1000 GB		1-4	1-20 users per month
206	proteomics				Both are possible.	1-1000 GB		1-4	1-20 users per month
207	proteomics				Both are possible.	1-1000 GB		1-4	1-20 users per month
208	mouse				The staff of the core facility does (the users don’t work at the core facility).	< 1MB		1-4	21-40 users per month
209	proteomics				The staff of the core facility does (the users don’t work at the core facility).	1-1000 TB		5-8	1-20 users per month
210	microscopy				Both are possible.	1-1000 TB		13-16	> 100 users per month
211	proteomics				Both are possible.	1-1000 GB		5-8	21-40 users per month
212	histology				Both are possible.	1-1000 GB		1-4	> 100 users per month
213	flow cytometry				Both are possible.	1-1000 GB		1-4	61-80 users per month
214	flow cytometry				Both are possible.	1-1000 GB		1-4	21-40 users per month
215	Other	imaging			Both are possible.	I don’t know		>16	1-20 users per month
216	genomics				The staff of the core facility does (the users don’t work at the core facility).	1-1000 TB		5-8	81-100 users per month
217	histology				The staff of the core facility does (the users don’t work at the core facility).	I don’t know		1-4	21-40 users per month
218	microscopy				Both are possible.	1-1000 TB		1-4	81-100 users per month
219	Other	Transcript			The staff of the core facility does (the users don’t work at the core facility).	I don’t know		>16	1-20 users per month
220	NMR				The staff of the core facility does (the users don’t work at the core facility).	1-1000 MB		1-4	1-20 users per month
221	microscopy				The users work at the core facility (you provide the infrastructure only).	1-1000 TB		1-4	21-40 users per month
222	microscopy				Both are possible.	1-1000 GB		1-4	21-40 users per month
223	pluripotent stem cells				Both are possible.	1-1000 MB		5-8	1-20 users per month
224	Other	Laser microdissection			Both are possible.	1-1000 MB	Micrographs of the excised material are taken by some users.	1-4	1-20 users per month
225	proteomics				The staff of the core facility does (the users don’t work at the core facility).	1-1000 GB		1-4	1-20 users per month
226	genomics	Sequencing - more than genomics!			The staff of the core facility does (the users don’t work at the core facility).	1-1000 MB		5-8	1-20 users per month
227	protein expression				Both are possible.	1-1000 GB		1-4	1-20 users per month
228	genomics				Both are possible.	1-1000 GB		5-8	21-40 users per month
229	microscopy				Both are possible.	1-1000 TB		1-4	61-80 users per month
230	microscopy				Both are possible.	1-1000 TB		1-4	1-20 users per month
231	flow cytometry				Both are possible.	1-1000 GB		1-4	> 100 users per month
232	flow cytometry	Mass cytometry			The staff of the core facility does (the users don’t work at the core facility).	1-1000 TB		1-4	1-20 users per month
233	NMR				Both are possible.	1-1000 GB		5-8	21-40 users per month
234	mouse	behavioral neuroscience			Both are possible.	1-1000 GB		5-8	1-20 users per month
235	proteomics				The staff of the core facility does (the users don’t work at the core facility).	1-1000 TB		5-8	21-40 users per month
236	proteomics				The staff of the core facility does (the users don’t work at the core facility).	1-1000 TB		1-4	1-20 users per month
237	proteomics	proteomics, mass spectrometry, protein analysis			Both are possible.	1-1000 GB		1-4	21-40 users per month
238	microscopy				Both are possible.	1-1000 GB		1-4	81-100 users per month
239	flow cytometry				Both are possible.	1-1000 GB		1-4	1-20 users per month
240	microscopy				The staff of the core facility does (the users don’t work at the core facility).	1-1000 MB		5-8	1-20 users per month
241	genomics	genomics and bioinformatics			Both are possible.	1-1000 GB		1-4	21-40 users per month
242	proteomics				Both are possible.	1-1000 GB		1-4	1-20 users per month
243	genomics				The staff of the core facility does (the users don’t work at the core facility).	1-1000 TB		5-8	1-20 users per month
244	proteomics				Both are possible.	1-1000 GB		5-8	1-20 users per month
245	Other	surgical models			Both are possible.	1-1000 GB		1-4	21-40 users per month
246	microscopy				Both are possible.	1-1000 GB		1-4	1-20 users per month
247	Other	About 15 Core Facilities (flow cytometry, Genomics, Microscopy metabolomics...) are managed and organized and managed by a scientific commitee			Both are possible.	1-1000 MB		13-16	21-40 users per month
248	microscopy				Both are possible.	1-1000 GB		1-4	41-60 users per month
249	antibodies				The staff of the core facility does (the users don’t work at the core facility).	1-1000 MB		1-4	21-40 users per month
250	genomics				The staff of the core facility does (the users don’t work at the core facility).	I don’t know		1-4	1-20 users per month
251	microscopy				Both are possible.	1-1000 GB		1-4	1-20 users per month
252	microscopy				The users work at the core facility (you provide the infrastructure only).	1-1000 TB		5-8	> 100 users per month
253	microscopy				Both are possible.	1-1000 GB		5-8	21-40 users per month
254	cell culture				The staff of the core facility does (the users don’t work at the core facility).	< 1MB		>16	> 100 users per month
255	metabolomics	metabolomics			The staff of the core facility does (the users don’t work at the core facility).	1-1000 GB		5-8	1-20 users per month
256	flow cytometry				Both are possible.	1-1000 GB		5-8	21-40 users per month
257	flow cytometry				Both are possible.	1-1000 GB		1-4	41-60 users per month
258	flow cytometry				The users work at the core facility (you provide the infrastructure only).	1-1000 GB		1-4	61-80 users per month
259	genomics				The staff of the core facility does (the users don’t work at the core facility).	1-1000 TB		13-16	21-40 users per month
260	microscopy				Both are possible.	1-1000 GB		1-4	1-20 users per month
261	proteomics				The staff of the core facility does (the users don’t work at the core facility).	1-1000 TB		9-12	41-60 users per month
262	microscopy				Both are possible.	1-1000 TB		1-4	41-60 users per month
263	flow cytometry				Both are possible.	I don’t know		1-4	41-60 users per month
264	microscopy				The staff of the core facility does (the users don’t work at the core facility).	1-1000 GB		1-4	1-20 users per month
265	microscopy				Both are possible.	1-1000 TB		5-8	21-40 users per month
266	flow cytometry				Both are possible.	1-1000 GB		1-4	> 100 users per month
267	Other	mri			Both are possible.	1-1000 GB		5-8	21-40 users per month
268	genomics				The staff of the core facility does (the users don’t work at the core facility).	1-1000 TB		9-12	41-60 users per month
269	Other	recombinant viruses			The staff of the core facility does (the users don’t work at the core facility).	I don’t know	We are producing biological material. It has nothing to do with bioinformatic or digital data.	1-4	1-20 users per month
270	genomics				Both are possible.	1-1000 MB		1-4	> 100 users per month
271	proteomics				Both are possible.	1-1000 MB		1-4	1-20 users per month
272	genomics	DNA sequencing			The staff of the core facility does (the users don’t work at the core facility).	1-1000 GB		1-4	1-20 users per month
273	mouse	neurobehavior			The staff of the core facility does (the users don’t work at the core facility).	I don’t know		5-8	1-20 users per month
274	mouse				The staff of the core facility does (the users don’t work at the core facility).	I don’t know		>16	1-20 users per month
275	mouse				Both are possible.	1-1000 GB		1-4	1-20 users per month
276	microscopy				Both are possible.	1-1000 TB		1-4	21-40 users per month
[truncated: 14 more columns]

## Sheet: 1bis
# employees	users per month	type	who works		employee	users	flow cytometry	genomics	microscopy	mouse	proteomics	histology	protein expression	metabolomics
1	21	crystallography	both		2.5	10	8	8	19	6	16	5	5	4
1	1	microscopy	both		2.5	30	11	3	8	5	4	1	0	1
1	1	Other	both		2.5	50	10	0	11	0	0	1	1	0
1	1	pluripotent stem cells	both		2.5	70	5	0	4	0	0	0	0	0
1	1	microscopy	both		2.5	90	2	0	5	0	0	0	0	0
1	1	proteomics	both		2.5	110	5	2	1	0	0	1	0	0
1	1	Other	user		6.5	10	1	7	2	3	5	0	1	2
17	1	bioinformatics	both		6.5	30	1	2	3	0	4	0	1	0
1	61	microscopy	user		6.5	50	3	1	1	0	0	0	0	0
1	41	microscopy	both		6.5	70	0	0	1	0	0	0	0	1
1	41	microscopy	user		6.5	90	0	1	0	0	0	0	0	0
5	1	Other	both		6.5	110	1	1	3	0	0	1	0	0
1	101	flow cytometry	user		10.5	10	0	0	0	0	1	0	0	0
9	1	Other	staff		10.5	30	0	2	0	0	1	1	0	0
5	101	Histology	both		10.5	50	1	1	1	0	2	1	0	0
5	41	genomics	both		10.5	70	0	0	0	0	0	0	0	0
1	101	cell culture	user		10.5	90	0	0	0	0	0	0	0	0
1	1	genomics	staff		10.5	110	1	0	0	0	0	0	0	0
1	21	mouse	user		14.5	10	0	0	0	0	0	0	0	0
5	1	mouse	both		14.5	30	0	1	0	0	0	0	0	0
1	21	mouse	staff		14.5	50	0	0	0	0	0	0	0	0
5	1	protein expression	staff		14.5	70	0	0	0	0	0	0	0	0
1	1	genomics	both		14.5	90	0	0	1	0	0	0	0	0
1	1	bioinformatics	user		14.5	110	1	1	1	0	1	0	0	0
1	101	genomics	user		18.5	10	0	1	0	1	1	0	0	0
1	21	proteomics	staff		18.5	30	0	1	0	1	0	0	0	0
1	1	metabolomics	user		18.5	50	0	0	0	0	0	0	0	0
5	1	metabolomics	staff		18.5	70	0	0	0	0	0	0	0	0
17	21	Other	both		18.5	90	0	1	0	0	0	0	0	0
1	1	metabolomics	both		18.5	110	0	0	2	0	0	0	0	0
1	21	mouse	staff				50	33	63	16	35	11	8	8
5	21	genomics	both
1	61	flow cytometry	both
1	1	mouse	user
1	1	proteomics	both
1	21	flow cytometry	staff
5	1	proteomics	both
1	101	microscopy	user
1	1	proteomics	staff
5	1	proteomics	staff
1	41	microscopy	user
5	1	pluripotent stem cells	user
17	21	Other	both
1	21	flow cytometry	staff
9	41	proteomics	staff
5	101	Other	user
1	1	cell culture	both
5	1	microscopy	both
1	1	Histology	both
1	21	flow cytometry	user
1	1	genomics	both
9	101	Other	user
17	21	mouse	both
1	41	Histology	both
9	41	Histology	user
5	101	microscopy	both
1	1	microscopy	both
1	1	proteomics	staff
1	21	flow cytometry	user
1	21	flow cytometry	both
1	1	proteomics	staff
1	41	microscopy	user
13	81	microscopy	both
5	1	genomics	staff
1	1	protein expression	staff
1	1	Other	staff
17	21	Other	both
1	1	mouse	staff
17	101	microscopy	both
1	21	microscopy	staff
1	21	flow cytometry	both
1	81	microscopy	both
1	1	genomics	both
1	1	genomics	both
5	101	genomics	both
9	1	Other	staff
5	21	proteomics	both
1	21	flow cytometry	both
5	1	genomics	staff
1	41	flow cytometry	both
1	1	Other	staff
1	21	bioinformatics	both
1	1	Other	staff
1	21	microscopy	both
1	1	Other	both
17	101	microscopy	both
1	1	protein expression	both
1	41	flow cytometry	both
1	21	microscopy	both
1	21	flow cytometry	user
1	1	mouse	both
1	41	microscopy	both
1	1	histology	both
1	1	microscopy	both
1	101	flow cytometry	both
1	21	proteomics	staff
1	21	bioinformatics	both
9	21	genomics	staff
1	1	microscopy	both
1	1	Other	both
13	101	genomics	both
5	21	protein expression	both
1	1	histology	both
1	101	cell culture	both
1	1	microscopy	staff
17	21	genomics	both
1	1	protein expression	both
1	41	microscopy	both
1	1	metabolomics	staff
1	101	flow cytometry	both
5	1	genomics	both
9	41	microscopy	both
1	41	flow cytometry	both
5	101	flow cytometry	both
1	1	microscopy	both
1	1	metabolomics	both
5	41	flow cytometry	both
17	81	genomics	staff
1	61	microscopy	both
5	1	proteomics	staff
1	1	microscopy	both
1	1	Other	both
5	21	Other	both
1	1	histology	staff
13	101	proteomics	both
5	41	flow cytometry	user
1	41	microscopy	both
1	81	microscopy	both
1	21	microscopy	both
1	61	flow cytometry	both
13	101	flow cytometry	both
1	21	flow cytometry	both
1	21	genomics	staff
1	1	microscopy	both
1	1	mouse	user
1	1	microscopy	both
1	1	flow cytometry	both
1	1	flow cytometry	both
1	21	metabolomics	both
1	1	microscopy	both
9	101	flow cytometry	both
9	101	Other	both
1	41	flow cytometry	user
1	1	Other	both
1	41	protein expression	both
1	21	flow cytometry	both
5	41	flow cytometry	both
1	61	microscopy	user
1	1	NMR	both
1	1	microscopy	both
1	81	flow cytometry	both
1	1	flow cytometry	both
1	21	proteomics	staff
5	1	flow cytometry	both
1	1	flow cytometry	both
1	41	microscopy	both
1	41	flow cytometry	both
1	41	flow cytometry	both
5	41	microscopy	both
1	21	mouse	both
9	21	histology	both
5	1	Other	staff
1	1	microscopy	both
1	1	NMR	both
5	61	metabolomics	both
9	41	flow cytometry	both
1	61	flow cytometry	both
1	1	cell culture	both
1	21	genomics	both
1	81	microscopy	user
1	21	Other	both
5	21	proteomics	staff
5	61	microscopy	both
1	1	flow cytometry	both
5	1	genomics	both
1	41	microscopy	both
1	1	microscopy	both
1	1	flow cytometry	both
1	1	proteomics	staff
1	21	microscopy	both
1	1	protein expression	staff
1	1	genomics	both
1	1	proteomics	staff
1	41	flow cytometry	both
17	1	genomics	staff
1	1	Other	staff
5	1	genomics	both
17	1	proteomics	staff
1	1	crystallography	staff
1	1	bioinformatics	both
1	1	proteomics	staff
9	1	proteomics	staff
9	1	Other	both
1	1	proteomics	staff
13	61	bioinformatics	both
9	21	proteomics	staff
5	21	microscopy	both
5	101	microscopy	staff
1	1	proteomics	staff
9	21	genomics	staff
1	1	histology	both
1	1	Other	both
1	81	flow cytometry	both
1	41	flow cytometry	both
1	1	mouse	both
1	1	proteomics	both
1	1	proteomics	both
1	21	mouse	staff
5	1	proteomics	staff
13	101	microscopy	both
5	21	proteomics	both
1	101	histology	both
1	61	flow cytometry	both
1	21	flow cytometry	both
17	1	Other	both
5	81	genomics	staff
1	21	histology	staff
1	81	microscopy	both
17	1	Other	staff
1	1	NMR	staff
1	21	microscopy	user
1	21	microscopy	both
5	1	pluripotent stem cells	both
1	1	Other	both
1	1	proteomics	staff
5	1	genomics	staff
1	1	protein expression	both
5	21	genomics	both
1	61	microscopy	both
1	1	microscopy	both
1	101	flow cytometry	both
1	1	flow cytometry	staff
5	21	NMR	both
5	1	mouse	both
5	21	proteomics	staff
1	1	proteomics	staff
1	21	proteomics	both
1	81	microscopy	both
1	1	flow cytometry	both
5	1	microscopy	staff
1	21	genomics	both
1	1	proteomics	both
5	1	genomics	staff
5	1	proteomics	both
1	21	Other	both
1	1	microscopy	both
13	21	Other	both
1	41	microscopy	both
1	21	antibodies	staff
1	1	genomics	staff
1	1	microscopy	both
5	101	microscopy	user
5	21	microscopy	both
17	101	cell culture	staff
5	1	metabolomics	staff
5	21	flow cytometry	both
1	41	flow cytometry	both
1	61	flow cytometry	user
13	21	genomics	staff
1	1	microscopy	both
9	41	proteomics	staff
1	41	microscopy	both
1	41	flow cytometry	both
1	1	microscopy	staff
5	21	microscopy	both
1	101	flow cytometry	both
5	21	Other	both
9	41	genomics	staff
1	1	Other	staff
1	101	genomics	both
1	1	proteomics	both
1	1	genomics	staff
5	1	mouse	staff
17	1	mouse	staff
1	1	mouse	both
1	21	microscopy	both

## Sheet: 2
	How are you communicating with users?	in person, face to face	email	phone	website	social media	communication / management software	seminar, workshop	user group meeting	other	communication needs improvement	if yes, how?	how to improve communication	Are you using a communication software?	If yes, which software?	What is your experience?	Would it make sense to use a communication platform?	Would you see obstacles?	Would you see obstacles?		How are you communicating with users?	all	full-service	hybrid-service	self-service	flow cytometry	genomics	histology	metabolomics	microscopy	mouse/rat	protein expression	proteomics		communication needs improvement	all	full-service	hybrid-service	self-service	flow cytometry	genomics	histology	metabolomics	microscopy	mouse/rat	protein expression	proteomics		how to improve communication
1	email, website, phone, meetings	Yes	Yes	Yes	Yes		No				No			No			No	Discussing a project requires many different documents provided by the users	heterogeneity		email	266	71	168	27	49	33	11	8	60	15	8	32		yes	103	26	63	14	20	19	5	2	21	6	4	16		communication/management software
2	In person (English)	Yes					No				No			No			No				in person	255	69	163	23	44	31	10	8	60	14	8	31		no	173	47	112	14	30	14	6	6	42	10	4	19		chat, social media, discussion platform
3	Email, in person	Yes	Yes				No				No			No			Yes	Moderation of threads.			phone	176	60	108	8	29	24	6	4	36	9	7	26			276													get the users read + cooperate
4	Email, Meetings, Skype, phone, Booking System	Yes	Yes	Yes	Yes	Yes	No				No			No			No				seminars/workshops	122	29	85	8	27	17	5	4	31	3	6	10																more seminars
5	Via sound waves and emails	Yes	Yes				No				No			No			No				website	110	22	75	13	18	18	5	3	36	3	5	10																more visibility/advertising
6	E-Mail, Phone		Yes	Yes			No				No			No			Yes	The implementation might be a hurdle	implementation		user group meeting	83	13	62	8	10	9	3	1	24	3	3	7																better website
7	e-mail, website, phone, animal database and most preferably direct meetings	Yes	Yes	Yes	Yes		No				No			No			Yes				communication/management software	70	26	37	7	13	12	3	3	12	2	3	11																more staff/time
8	Zendesk						Yes				No			Yes	Zendesk (other)	perfect	N/A				social media	32	7	22	3	7	5	2	1	8	0	1	2																feedback from users
9	Web forms e-mails		Yes				Yes				No			Yes	web forms / PPMS	communication with users ok, more effort in communications with PIs	N/A				other	10	0	6	4	3	0	2	0	3	0	0	0																automation
10	website, newsletters, workshop and seminars				Yes		No	Yes		Newsletter	No			No			Yes	find the budget to hire dedicated person for communication	cost																														early involvement
11	bi-annual newsletter, email list per instrument, annual user meeting, incidents are reported on our reservation system (PPMS)		Yes				Yes		Yes	Newsletter	No			Yes	PPMS	communication is very important	N/A																																PI involvement
12	By mail, by phone and through "in vivo" discussions. Discussions constitute the preferred way of communication in order to understand the biological question, make sure that the experiment has been designed properly and suggest the best approach and/or analysis type to produce the most useful data (to answer the question).	Yes	Yes	Yes			No				Yes	It can always be improved but I believe this is rather a personal issue. We should make an effort to educate researchers on the best practices while designing their experiments and collecting and storing their samples for metabolomic analysis.		No			Yes	Communication is indeed very important and I would say it relies exclusively on exchange of information and how much each person involved cares about the outcome.																															open door hours
13	e-mail, website, twitter		Yes		Yes	Yes	No				Yes	So I know that they are reading the information not just receiving	know that info is read	No			Yes	Maybe a good thing but still depends on the users being engaged to read	user																														better follow-up
14	personal meetings email, phone presentations	Yes	Yes	Yes			No	Yes			No			Yes	ELN		No	we have a standardised reporting process usually with powerpoint and excel table outputs. Any platform needs to be operating system independent	heterogeneity
15	e mail, website, visual display, brochures, personal interaction, facebook	Yes	Yes		Yes	Yes	No			Brochures	Yes	more regular outreach		No			Yes	time resource	time
16	emails mainly		Yes				No				Yes			No			Yes	It should be fully searchable, and exportable in standard format.
17	Facility Induction tours, facility handbooks, user group meetings, emails, in person	Yes	Yes				No		Yes	facility handbooks	No			No			No
18	E-mail, messaging via iLabs, Telephone, face-to-face	Yes	Yes	Yes			Yes				Yes	Better overview of e-mails	management	Yes	iLab		Yes
19	personally	Yes					No				Yes			No			Yes
20	Through the core facility website and also by email		Yes		Yes		No				No			No			No	Yes, because we work with live animals and this is sensitive subject
21	Mail, Phone, Meeting	Yes	Yes	Yes			No				No			No			Yes
22	By email, by phone, by face-to-face meeting.	Yes	Yes	Yes			No				Yes	Software for project progression.	software management	No			Yes
23	Email, Twitter		Yes			Yes	No				Yes	Intranet page, local forum	website, platform	No			Yes	Don't understand it
24	E-mail, weekly meetings, github	Yes	Yes				Yes				No			Yes	github (other)		No
25	email, opening hours, scheduled meeting	Yes	Yes				Yes				Yes	website, regular updates, seminars	website, regular updates, seminars	Yes	Parkour (LIMS)		N/A
26	personell discussion before and after sample submission	Yes					Yes				Yes	Discussions are time consuming. More experienced persons in the Core facility are needed.	more staff	Yes	iLab Agilent	It is ok for management of samples and data. It does not replace discussions.	N/A
27	face2face, personal email, intranet page, automatic emails from sample tracking system	Yes	Yes		Yes		No				Yes	More users should ask for help/feedback/advice before/during experiments rather than be unhappy with data afterwards. More users should read the manuals that we provide	users should read	No			No	It's difficult to get users to use yet another communication channel. Email works quite well for us. I see that new ways of lab communication like slack are adopted very slowly. Anything where users would have to look or actively access is an obstacle	user
28	Via email or online booking system or personal meetings.	Yes	Yes				Yes				No			Yes	iLab	Works very well for our needs	N/A
29	email face-to-face	Yes	Yes				No				Yes	simple project management software - eg MS Teams with Planner and OneNote	management software -	Yes	ELN		N/A
30	Email & personal communication	Yes	Yes				No				No			No			No	Does not provide benefits & costs time/money	time, cost
31	Mail, Database		Yes				No				No			No			Yes	No
32	consulting or E-Mails	Yes	Yes				Yes				Yes			Yes	iLab		N/A
33	via email, phone, our booking platform		Yes	Yes	Yes		No				No			No			No	our students/researchers are overloaded with information, newsletters, social media, other communication channels...	overload
34	Mainly email, and in person meetings	Yes	Yes				No				Yes	More feedback of users which is kind of lacking	feedback of users	No			Yes	implementation by our IT department	implementation
35	Home made LIMS system. Meeting in person.	Yes					Yes				No			Yes	home made LIMS		N/A
36	email personally phone open Iris scheduler	Yes	Yes	Yes			Yes				No			Yes	Open IRIS		No	Users are overwhelmed with the different means of communication. We have a strict rule that people using the core facility have to read their email for information. Also the scheduling software uses email to "communicate". We do not communicate via private means (mobile phone, whats app, etc.). To add an additional means of communication would not be more efficient.	overload
37	Via email and Skype mostly, sometimes via telephone.		Yes	Yes		Yes	Yes				Yes	More streamlined, ticketing system, less pressure to answer immediately.	management	Yes	YouTrack software with home-made website built on top of it (other)	Communication is almost a full-time job. It falls apart in 2 different aspects: practical/organization issues and scientific/expert advice. Ideally those can be covered by different people or teams. The expert advice takes most time and is basically a consultancy job. Myself and many core facilities manager colleagues have to care of both types of communication which makes the job rather heavy. I…	N/A
38	First time user can always approach us in person and via email. We send first time users the link to new user project questions - asking user to describe their project, then a) general personal introductory session is scheduled for small group of new users - once a wee - to talk about how to use the Light Microscopy Facility ( LMF), user guidelines, administration and safety aspects , LMF staff m…	Yes	Yes		Yes		No		Yes		Yes	I feel that we could have better documented the follow-up regarding the user projects, yet there is also issue of the capacity of the LMF staff - with 4 staff members we have to process 240 users per year many of them with multiple requests. While we feel that we are quite good at the initial phase with users to get them started in our LMF, we feel that time for follow-up is rather limited and th…	better follow-up, more staff	Yes	ELN		Yes	In case that we move to communication platform - we have to make sure that this is SINGLE ENTRY POINT EASY TO USE for users and LMF staff and for all services and facilities in the institute. Users should not be forced to communicate with different services and facilities using different communication tools. Yet , in case that there is one communication platform - it still must reflect the needs …	heterogeneity, complexity, user
39	Facility email address, open office hours, walk-up lab access	Yes	Yes				No				Yes	- automated progress tracking and reporting for users after log-in - automated invoicing	- automation	No			Yes	Faculty is too slow to purchase one.
40	e-mail or in person (phone, less frequently)	Yes	Yes	Yes			No				Yes	writing emails is good because the information remains recorded, but takes a lot of time		No			Yes	It depends , I have no idea what you mean with " communication platform"
41	mostly e-mail and in person	Yes	Yes				No				No			No			No
42	Phone email meetings	Yes	Yes	Yes			No				No			No			No
43	Email		Yes				No				No			No			No	I do not see obstacles but the fact is that there is presently no need for a true communication platform
44	E-Mail, phone, Messenger service such as Whattsapp, in person	Yes	Yes	Yes		Yes	No				No			No			Yes
45	email, informatics system		Yes				Yes				No			Yes	Agendo	Good	N/A
46	Helpdesk tickets, 1:1, email, seminars, user groups and a specialised Core Facility Management Software	Yes	Yes				Yes	Yes			Yes	To run a technology club to advertise to a wider audience any new technologies or equipment that comes into the Core	advertising	Yes	Stratocore PPMS and Helpdesk	Helpdesk software is very useful for tracking user requests. PPMS software is useful for understanding user base for equipment, and communicating when equipment is booked or not available.	N/A
47	personal communication, e-mail, intranet-site, labfolder (electronical notebook), bulletin board	Yes	Yes		Yes		Yes			bulletin board	No			Yes	restyaboard, ELN	I am just starting doing to set it up myself. I have been invited to an other group using Trello. It is very useful to organize workflows. In addition, we are using an electronical lab book which is shared within the group and users. The electronical lab book has improved the documentation and my people are better organized.	N/A
48	Personal interactions email	Yes	Yes				No				No			No			No
49	email, phone, personally	Yes	Yes	Yes			No				No			No			No
50	email and online booking software		Yes		Yes		No				No			No			No	too many different options dont work for us, users don't read (e.g. please contact us via online scheduler) so they just send an email and ask what they have to do.	user
51	email and personal contact	Yes	Yes				No				No			No			No
52	through emails and annual user meetings		Yes				No		Yes		No			No			No
53	Interactive database (PyRAT), email, telephone, personally	Yes	Yes	Yes			Yes				Yes	One always wants better communication, although we are fairly happy with the way it works at the moment. The shortcomings are typically human (forgetfulness, cultural)	user cooperation	Yes	PyRAT (other)	Excellent, although PyRAT is not really communication software, but it handles work requests well	N/A
54	Website and email		Yes		Yes		No				Yes			Yes	LIMS		Yes
55	In order of frequency: Email/PPMS and face to face with highest frequency, we also have a user booklet, then twitter, yammer, seminars, inviting users to our retreats/weekly meeting to present on their projects. Starting up a user group meeting again in the new year - every 6 months to start with. The last one failed but that was over 3/4 years ago and was possibly too frequent. Our intranet is o…	Yes	Yes			Yes	Yes	Yes	Yes	booklet	Yes	As per the above future actions		Yes	MS-SharePoint, PPMS	Sharepoint is new and not set up yet for our core to maximize use. To date PPMS and outlook has been the most used electronic communication system.	N/A
56	Directly face to face or via E-mail or in special workshop with specific topics	Yes	Yes				Yes	Yes			Yes	Users are not using directly online communication even if we have it on the desktop of all set-ups	User cooperation	Yes	MS-SharePoint (other)	Users are not using directly online communication even if we have it on the desktop of all set-ups	N/A
57	email, in person, phone	Yes	Yes	Yes			No				No			No			No
58	General info: website Personal communication by email, phone		Yes	Yes	Yes		No				Yes	Better presentation of information on website (fees, procedures, offered services) Regular and better feedback during course of projects e.g. reaching of milestones. Trying to minimize „lost” unanswered emails	website, feedback, management	No			Yes	Additional platforms for single core facilities will not be accepted by users: too high investment in registration / installation. Combined platform for all facilities could be attractive. Optimized email communication is sufficient (e.g. with ticketing system).	overload
59	Phone, E-Mail, Homepage, Face-to-face, seminars	Yes	Yes	Yes	Yes		No	Yes			Yes	More seminars	More seminars	No			Yes	Data protection, as hospital	data protection
60	booking platform e-mail telephone		Yes	Yes	Yes		No				Yes	no e mail ping pong		No			Yes
61		Yes	Yes	Yes	No	No	No	Yes	No		Yes	Having a kind of a chat system along with project/sample administration. Each users' project would have a chat possibility with archiving properties so that every step can be traced and attributed to a tagged project.	chat, management	No			Yes	generally, no.
62		Yes	Yes	Yes	No	No	No	No	No		No			No			Yes
63		Yes	Yes	Yes	Yes	No	No	Yes	No		Yes	dedicated management software	dedicated management software	No			Yes	Yes for automated communication regarding system status, feedback. Individualized and fragmented software platforms for operating systems, active directories, management systems, etc. No for any other type of communication like general communication.	complexity
64		Yes	Yes	Yes	No	No	No	Yes	No		No			No			No	Higher workload to manage additional communication platform.	maintenance
65		Yes	Yes	Yes	No	No	Yes	Yes	No		Yes	tool that combines project management, ELN, invoicing, user communication	management	Yes	Open IRIS, ELN		Yes	IP related Content (patent-related stuff)	data protection
66		Yes	Yes	Yes	No	Yes	No	No	Yes		No			No			No
67		Yes	Yes	Yes	Yes	No	No	Yes	Yes		No			No			No	Already to much information via usual channels (Email etc etc)	overload
68		Yes	Yes	Yes	No	No	No	No	No		No			No			No
69		Yes	No	No	Yes	No	No	No	Yes		Yes			No			Yes
70		Yes	Yes	Yes	No	No	Yes	Yes	Yes		No			Yes	Open IRIS		N/A
71		Yes	Yes	Yes	No	No	No	No	No		No			No			No
72		Yes	Yes	Yes	Yes	No	No	Yes	Yes		No			No			Yes	user and instrument group platforms, probably including new media may be the future, but is hard to realize in an academic environment with all the GDPR regulations Universities are confronted with	data protection
73		Yes	Yes	Yes	No	No	Yes	Yes	Yes		No			Yes	ELN		Yes	We established a electronic notebook, where we also can share information. It would be great if communication and booking could be within that system. Otherwise one has to many different programs.	heterogeneity
74		Yes	Yes	Yes	No	No	No	No	No		No			No			No
75		Yes	Yes	Yes	Yes	No	No	No	Yes		No			No			Yes
76		Yes	Yes	Yes	No	No	No	No	Yes		No			Yes	ELN		No	each project is custom/unique	complexity
77		Yes	Yes	Yes	Yes	No	No	No	No		Yes	I would prefer a better communication in advance, means before the experiments starts, because then we have influence about all the details which are important for a significant assay	early communication	No			Yes	no
78		Yes	Yes	Yes	No	No	No	No	No		No			No			No
79		Yes	Yes	Yes	Yes	No	No	Yes	No		No			No			Yes	keeping the software updated	maintenance
80		Yes	Yes	Yes	Yes	No	No	Yes	No		Yes	Management software for e.g. booking, user and project management, Q&A, follow-up on Projects/publications	Management software	No			Yes	Data protection, regular updates, proper user/project management	data protection, maintenance
81		Yes	Yes	Yes	No	No	No	No	No		No			No			No	For peptides it would be possible, for all other synthesis the differences between the orders are too much	complexity
82		Yes	Yes	Yes	No	No	No	Yes	No		No			No			No
83		Yes	Yes	Yes	No	Yes	No	No	No		No			No			No
84		Yes	Yes	Yes	Yes	No	Yes	No	No		No			Yes	Open IRIS	It is a good system with some peculiarities and sometimes very slowly. E-Mail contact is often used too. Often a personal face to face meeting is very helpful to understand the research questioning and to give optimal consultation.	N/A
85		Yes	Yes	Yes	No	No	No	No	Yes		No			No		This works fine especially with international collaborations.	N/A
86		Yes	Yes	No	Yes	No	No	Yes	Yes		Yes			No			Yes
87		Yes	Yes	Yes	Yes	No	Yes	Yes	No		Yes	???		Yes	PPMS	Good, but not excellent	N/A
88		No	Yes	Yes	Yes	No	No	Yes	No		No			No			Yes	we have already tools for booking instruments.... new tools would be better implemented in this web application
89		Yes	Yes	Yes	Yes	No	No	Yes	No		No			No			No
90		Yes	Yes	Yes	No	No	No	No	Yes		No			No			No	usually we better understand the problems in a face to face explanation/ chat	discussion
91		Yes	Yes	Yes	Yes	No	No	No	Yes		No			No			No
92		Yes	Yes	No	Yes	Yes	No	Yes	Yes		No			No			No
93		Yes	Yes	Yes	No	No	No	No	No		No			No			No
94		Yes	Yes	Yes	Yes	No	No	No	No		No			No			No	more time-consuming	time
95		Yes	Yes	Yes	Yes	No	No	Yes	Yes		Yes	We have several different categories of equipment and several different categories of users. It would be nice to be able to more easily contact users by category/specific instrument in order to send announcements, notifications of service issues, etc.	management	No			Yes	We have a large number of users and these users frequently fluctuate or change. I foresee a difficulty in being able to keep the platform up to date. I also see a difficulty in integrating it with our computer center here. We get very little IT support here.	maintenance, complexity
96		Yes	Yes	No	No	No	Yes	Yes	No		Yes			Yes	iLab Agilent	it is important. As always there are some steps which would be nice to improve.	N/A
97		Yes	Yes	No	No	Yes	Yes	Yes	No		Yes	respectful interactions would help	user cooperation	Yes	Slack, LIMS	this helps efficiency, but it reduces visibility	N/A
98		Yes	Yes	Yes	Yes	Yes	Yes	Yes	No		Yes	Better social media, more straight ticket, automation of requests	social media, automation	Yes	Zendesk, LIMS	good	N/A
99		Yes	Yes	Yes	No	No	No	No	No		No			No			Yes
100		Yes	Yes	Yes	No	No	No	No	Yes		No			No			Yes	Im not sure if all the users would use a new platform. More likely we get a mix which is then confusing	user
101		Yes	Yes	Yes	Yes	No	Yes	Yes	Yes		No			Yes	OTRS, Zammad (other)	Generally positive. Sometimes tedious to configure and it still need discipline.	N/A
102		Yes	Yes	Yes	Yes	No	No	Yes	No		No			No			Yes
103		Yes	Yes	Yes	No	No	No	No	No		No			No			Yes
104		Yes	Yes	Yes	Yes	No	No	No	Yes		No			No			Yes	Installing/managing the software	maintenance
105		Yes	Yes	Yes	No	No	No	No	No		Yes	regular seminars/workshop to get familiarized with the methods and work-flow of our service; so that expectations (time-line) and interpretation become real....	seminars	No			No	I prefer face -to-face communication/interaction	discussion
106		Yes	Yes	No	Yes	No	No	Yes	No		Yes			No			No
107		Yes	Yes	Yes	No	No	No	Yes	Yes		No			No			Yes
108		Yes	Yes	No	Yes	No	Yes	Yes	Yes		Yes	It is good overall but if we could reach even more users that would be great.	visibility	Yes	Stratocore PPMS	It works well for users who are already using the facility	N/A
109		Yes	Yes	Yes	Yes	No	Yes	Yes	No		Yes	better tracking systems for users to know how far in the analysis their samples are	management	Yes	PPMS	not ideal for the applications at the facility	N/A
110		Yes	Yes	Yes	No	Yes	Yes	Yes	No		Yes			Yes	AGENDO	Really great, is a very nice platform	N/A
111		Yes	Yes	Yes	Yes	Yes	No	Yes	Yes		Yes	Better communicate to get feedbacks and discover new users	t feedbacks visibility	No			Yes	We are not tracking correctly contacts and user information.
112		Yes	Yes	Yes	Yes	Yes	No	Yes	No		No			No			Yes
113		Yes	Yes	Yes	No	No	Yes	No	No		No			Yes	PPMS	It is perfect for booking appointments or time on the instruments. The first contact and meeting for sort projects still need to be done by phone or email.	N/A
114		Yes	Yes	No	Yes	No	Yes	Yes	No		No			Yes	Open IRIS	Works well but is sometimes a bit slow	N/A
115		Yes	Yes	Yes	No	No	No	No	Yes		No			No			No
116		Yes	Yes	No	No	No	No	Yes	Yes		No			No			No
117		Yes	Yes	No	No	Yes	No	No	No		No			No			No	too much communication is not helpful. Today, our students and users receive a lot of information every day from all the other laboratories and cores. We must find the best compromise possible to communicate with them in order to transmit only useful information ....	overload
118		Yes	Yes	Yes	Yes	No	No	Yes	No		No			Yes	LIMS		Yes	No, except that most users are used to communicate directly with the platform staff	discussion
119		Yes	Yes	Yes	Yes	Yes	No	Yes	No		Yes	I would like to be sure that my users read the microscopes checkup emails we send every months.	know that user read	No			No	Time consuming : we already have mails, twitter, reservation center, image database... too much software to handle.	time, overload
120		Yes	Yes	Yes	No	No	No	No	No		No			No			No	I answered yes to the question above, but one has to define what is meant. Concretely, what is a communication platform ? The worry is that we end up spending even more of our time (it is already a lot...) discussing with users. I would rather try to find ways to have users to learn a little bit more by themselves.
121		Yes	Yes	Yes	Yes	No	Yes	No	No		No			Yes	OCF Scheduler Ver. 2.03 (other)	For informing users about system downs it is not convenient but absolutely sufficient. All other communication tasks are solved by personal communication.	N/A
122		Yes	Yes	No	Yes	Yes	No	No	Yes		No			No			Yes
123		Yes	Yes	Yes	Yes	No	Yes	Yes	Yes		Yes	Involving more the users in the core facility development	Involve the users in development	Yes	Outlook and PPMS	good but insufficient	N/A
124		Yes	Yes	Yes	Yes	No	Yes	Yes	No		No			Yes	Open IRIS		N/A
125		Yes	Yes	Yes	No	No	Yes	No	No		Yes			Yes	in-house (other)		N/A
126		Yes	Yes	Yes	Yes	Yes	No	Yes	No		No			No			No	I would like to improve the communication with the PIs, users leave the facilities after 2-5 years. PIs influence the development of the facility 10-30 years!
127		Yes	Yes	Yes	No	No	No	No	No		No			No			No
128		Yes	Yes	No	Yes	No	Yes	Yes	Yes		No			Yes	Clustermarket (other)	It's new and I'm still trialling it, but so far ok.	N/A
129		Yes	Yes	No	Yes	No	No	No	Yes		Yes	I would like them to understand things better	cooperation	No			No	GDPR, our IT systems	data protection
130		Yes	Yes	No	No	No	Yes	Yes	No		Yes	We often send emails to our users containing important information and it is apparent that not everyone bothers to read these emails. Finding a way to ensure that they do read the emails or a more effective way of relaying information would be helpful.	ensure users read	Yes	PPMS	We love it. It is an excellent booking and financial management system. It also gives us a way of recording all communication pertaining to a particular piece of work/training etc	N/A
131		Yes	Yes	Yes	No	No	No	No	No		No			No			No
132		Yes	Yes	No	Yes	No	No	Yes	Yes		Yes	I think younger users respond better to social media and I should look to offer notifications via this route	social media	No			Yes	Cost. Data protection.	cost, data protection
133		Yes	Yes	No	Yes	No	Yes	No	No		No			Yes	agendo, Slack, LIMS		N/A
134		Yes	Yes	No	No	No	No	No	No		No			No			No
135		Yes	Yes	No	Yes	No	Yes	No	No		Yes	integrate an instant messaging in the platform syste (so not to rely on other "public" services like whatsapp)	chat	Yes	Booked-scheduler (other)	Very good for planning, limited ability for communication (mailing list + alerts on the website)	N/A
136		Yes	Yes	Yes	Yes	No	No	Yes	No		Yes	More support to do this provided by the university		No			Yes
137		Yes	Yes	Yes	No	No	No	Yes	No		No			No			No
138		Yes	No	No	No	No	No	No	No		No			No			No
139		Yes	Yes	Yes	No	Yes	No	No	No		No			No			No	e-mail works very well. Where I've used communication software to communicate with other platforms, for example some branches of computing infrastructure support, it's been far more of a hindrance than a help.
140		Yes	Yes	Yes	No	No	No	No	Yes		No			No			No
141		Yes	Yes	No	No	Yes	No	Yes	Yes		Yes	The reach for each of these methods is low, we try to have as many as possible but it is still hard to get information across.		No			Yes	It would need to be something used by all cores. Something that seems quite difficult to achieve!	heterogeneity
142		Yes	Yes	Yes	Yes	No	No	Yes	Yes		No			No			No	setup working between 2 organizations	heterogeneity
143		Yes	Yes	No	No	No	No	Yes	No		No			No			No
144		Yes	Yes	Yes	No	No	No	Yes	No		Yes	better website, social media as well as more "show and tell" type opportunities	website, social media, seminars	No			No	Even though the idea is good, most people already are overwhelmed with information overload and may be resistant to subscribing to another platform	overload
145		Yes	Yes	No	Yes	Yes	Yes	Yes	Yes		No			Yes	Microsoft Teams and iLab (Agilent)		N/A
146		Yes	Yes	No	No	No	No	No	No		Yes			No			Yes
147		Yes	Yes	Yes	No	No	No	Yes	No		No			No			Yes
148		Yes	Yes	Yes	Yes	No	No	Yes	No		Yes	Having more time per user would be good.	more time .	No			No
149		Yes	Yes	Yes	No	No	No	Yes	Yes		No			No			No
150		Yes	Yes	No	No	No	No	No	Yes		Yes	web based chat for routine communication	chat	No			Yes
151		Yes	Yes	No	Yes	No	No	Yes	No		No			No			No
152		Yes	Yes	No	No	No	No	Yes	No	announcements on Schedule	Yes	I think there is a LOT that can be communicated, but every person needs to know something different. Putting too much out there, or having announcements/signs seems to create sign blindness and no one looks at it.	user cooperation	No			No	one more thing to register, keep up with, pay for?	maintenance, cost
153		Yes	Yes	Yes	Yes	No	No	Yes	No		Yes			No			Yes
154		Yes	Yes	No	No	No	No	No	No		Yes			No			Yes	Time	time
155		Yes	Yes	No	No	No	No	No	No		No			No			No
156		Yes	Yes	No	Yes	No	No	No	Yes		No			No			No	Fragmentation, - different groups want to use different platforms lack of adoption - I refuse to use anything that requires me to install software on my own devices. I've tried slack, teams & trello and given up on all of them as merely gimmicks	heterogeneity
157		Yes	Yes	No	No	Yes	yes	Yes	No	Slack	Yes			Yes	Slack What'sApp	Even though I've set up a Slack page to report instrument issues - users are resistant to using it. They seem to prefer email or phone call - which i am less likely to respond to (i don't check emails out of hours or answer my phone - whereas instant messenger i am much more likely to respond to - it's also easier to fix issues over instant messenger as opposed to email, especially whilst sorting…	N/A
158		Yes	Yes	Yes	Yes	No	No	Yes	No		No			No			No
159		Yes	Yes	Yes	Yes	No	No	No	No		No			No			No
160		Yes	Yes	Yes	No	No	No	No	No		Yes	by using a software	management software	No			Yes
161		Yes	Yes	No	No	No	No	Yes	Yes		Yes	More automated communication to save users asking for updates that take up staff time	automation	No			Yes	We are actually investigating service now to have automated communication steps but are trying to tie this in with other softwares for data storage (such as filemaker)
162		Yes	Yes	Yes	Yes	No	No	No	Yes		Yes	standardized workflows for exchange of documents and improved internal project management and documentation	management	No			Yes	data protection issues (human data)	data protection
163		Yes	Yes	No	Yes	Yes	No	Yes	No		No			No			No
164		Yes	Yes	Yes	Yes	No	No	Yes	No		No			No			No
165		Yes	Yes	Yes	No	No	No	Yes	No		No			Yes	LIMS		No	In my opinion, all projects are best approached with a REAL conversation. This may be more true for metabolomics (where each experiment is carefully tailored to the individual) than other fields	discussion
166		Yes	Yes	No	No	No	Yes	No	Yes		Yes	More face to face discussion with them BEFORE projects start	early communication	Yes	PPMS.	It works ok, but as they get so many emails from PPMS, some of our messages fall between the cracks. Face to face is better but we have over 80 groups that use us so this is not always feasible.	N/A
167		Yes	Yes	Yes	No	No	Yes	Yes	Yes		No			Yes	Qualtrics (other)	Works well for surveys	N/A
168		Yes	Yes	Yes	No	No	No	No	No		No			No			Yes
169		Yes	Yes	Yes	No	No	No	Yes	Yes		No			No			Yes	It is hard to say without seeing the type of software we are talking about
170		Yes	Yes	No	Yes	No	No	No	No		Yes	The problem seems to be getting them to listen, as we send out information but they don't read it	users don't read	No			No	We already have too many different platforms for people to ignore	overload
171		Yes	Yes	No	No	No	Yes	No	No		Yes	Ideally users would have greater visibility of all of the work that is done for them rather than just the final outcome	visibility	Yes	Microsoft Teams; we are currently trialing ServiceNow, (other)	We searched long and hard for a usable Electronic notebook that could enable easy communication with users, record all of the different activities of facility staff, project progression and machine use etc but there isnt a single solution that was easy to implement locally	N/A
172		Yes	Yes	Yes	Yes	No	Yes	Yes	Yes		No			Yes	own software for ordering of services allows us to use chat and discussion forum (other)	very positive feedback from users	N/A
173		Yes	Yes	Yes	No	No	Yes	Yes	No		No			Yes	PPMS	Good	N/A
174		Yes	Yes	Yes	No	No	No	Yes	Yes		No			No			Yes
175		Yes	Yes	Yes	Yes	No	No	Yes	Yes		Yes	Greater awareness of our facilities nationally would be good. Have operated for 10 years but still surprising to meet individual researchers who have never heard of our existence. Also, would be great to increase the proportion of users that actually read our guidelines on how to use our facilities.	visibility. users actually read	Yes	LIMS		No	I'm sceptical, but open to suggestion. I prefer to use one channel of communication where possible, thereby everyone knows that essential info and communications go by that route. At the moment that channel is largely email, and I'd need a lot of convincing this can be improved.	heterogeneity
176		Yes	Yes	Yes	No	No	No	Yes	Yes		No			No			Yes	no
177		Yes	Yes	Yes	Yes	No	No	No	No		Yes	Communication software would be an interesting idea.	management software	No			Yes	The willingness of users to use it.	user
178		Yes	Yes	Yes	Yes	No	Yes	No	Yes		Yes	I would like to have the user report problems directly to me more often - now they sometimes just tell each other or make a small note in the paper user log and the information does not reach me or others in time. Then we find e.g. an instrument malfunction as an unpleasant surprise when coming to the instrument with samples already prepared etc. feedback	feedback	Yes	Agendo booking system. It allows for sending messages also.	The booking platform works fine, but I suspect that users are not always reading the messages sent through it, or it is considered spam as their email filters.	N/A
179		Yes	Yes	Yes	No	No	No	Yes	No		No			No			Yes	Limited time to keep all communication lines alive and updated.	time
180		Yes	Yes	Yes	Yes	No	No	Yes	No		No			No			No	it is better to use available comm. methods. People are reluctant to learn and use a new software (a separate login needed etc). An email list or a simple digital calendar should be enough to communicate. They already check their emails regularly for important messages and our digital reservation calendar is self explanatory.	overload
181		Yes	Yes	Yes	Yes	No	No	No	No		Yes	We would like to improve our communication to potential new users and be more visible	visibility	No			No
182		Yes	Yes	No	No	No	No	No	No		Yes	We intend to develop a web based platforms to get informations about the samples and plans.	platform	No			Yes	We provide many kind of service (QPCR, NGS, RNA integrity checking), maybe it is difficult to find an optimal platform to communicate with all kind of users.	complexity
183		Yes	Yes	Yes	No	No	No	No	No		Yes	By organizing seminars.	seminars.	No			Yes	Not at this point.
184		Yes	Yes	No	No	No	Yes	No	No		No			Yes	iLabs	This is fine for me	N/A
185		Yes	Yes	Yes	Yes	No	Yes	Yes	Yes		Yes			Yes	supportsystems.com (other)	ok, but can be improved	N/A
186		Yes	Yes	Yes	No	No	No	No	No		No			No			Yes	The small volume of our core facility that provides clinical chemistry services on an automated analyser is largely manageable without dedicated software. However, a simple software platform could help us to do work in a more time-efficient manner.
187		Yes	Yes	Yes	Yes	No	No	Yes	Yes		Yes			No			Yes
188		Yes	Yes	Yes	No	No	No	No	No		No			No			No	I'm not sure. Unless, confidentiality is guaranteed.	data protection
189		Yes	Yes	Yes	No	No	Yes	Yes	No		No			Yes	proprietary system for booking of instrumental time (other)	Mixed. An automation of processes inside the SW system is not flawless	N/A
190		Yes	Yes	No	No	No	No	No	No		Yes	PI's are often absent from the whole process. With the PI's still need to learn a lot about the technologies and their PhDs and Post-Docs still having a smaller experience, the PI's would need to be present in the discussion for the whole process to work end-to-end.	PI involvement	No			Yes
191		Yes	Yes	Yes	No	No	No	Yes	No		No			No			No
192		Yes	Yes	Yes	No	No	No	No	Yes		No			No			Yes
193		Yes	Yes	No	No	No	No	Yes	Yes		No			No			No
194		Yes	Yes	Yes	No	No	No	No	No		Yes	Management software	Management software	No			Yes
195		Yes	Yes	No	No	No	Yes	No	Yes		No			Yes	slack		N/A
196		Yes	Yes	Yes	No	No	Yes	No	Yes		No			Yes	our own ordering system (other)	we are happy with that, most of users, too	N/A
197		Yes	Yes	Yes	Yes	No	No	No	No		No			No			No	Communication face-to-face is efficient, communication trough platforms more easily resulting in misunderstanding	discussion
198		Yes	Yes	No	No	Yes	Yes	Yes	Yes		Yes	anyway which is relevant to the up and coming scientists where email is not impactful		Yes	slack	ok, but concerns about being on the cloud	N/A
199		Yes	Yes	Yes	No	No	No	No	No		No			No			Yes	not really, as long as I could have a private/ secured communication with each individual collaborators
200		Yes	Yes	Yes	Yes	Yes	Yes	Yes	No		No			Yes	RedMine (other)	We adapted the software to our needs.	N/A
201		Yes	Yes	Yes	Yes	No	No	Yes	No		No			No			No
202		Yes	Yes	Yes	No	No	yes	Yes	Yes		No			Yes	Skype, Polybox (other)	Often technical problems concerning the firewall settings in the hospital environment	N/A
203		Yes	Yes	No	Yes	No	No	Yes	No		No			No			Yes
204		Yes	Yes	Yes	Yes	No	Yes	Yes	No		No			Yes	IRIS		N/A
205		Yes	Yes	Yes	No	No	No	No	No		No			No			No
206		Yes	No	No	No	No	Yes	No	Yes		No			Yes	in house developed (other)	very good system to provide Data	N/A
207		Yes	Yes	Yes	Yes	No	No	No	No		No			No			Yes
208		Yes	Yes	Yes	No	No	No	Yes	No		No			No			No
209		Yes	Yes	Yes	No	No	No	No	No		No			No			No	We prefer face-to-face meetings to discuss projects in detail. In this way, users can profit best from our year-long experience and optimize their experiments to ensure optimal data quality.	discussion,
210		Yes	Yes	Yes	Yes	No	Yes	No	No		Yes	specialized automation and communication software / environment	automation and management software /	Yes	Slack, custom database - robot solutions	High maintenance - but highly flexible	N/A
211		Yes	Yes	Yes	Yes	No	No	Yes	Yes		Yes	Platform for sharing best practice for facility-user and user-user	Platform	No			Yes	Too many different pieces of software used by different groups so slow to take up another tool. Ideally there would be one tool used across many different areas of the university.	heterogeneity
212		Yes	Yes	Yes	Yes	No	Yes	Yes	Yes		No			Yes	ppms	ok	N/A
213		Yes	Yes	No	No	No	Yes	No	No		No			Yes	iLabs		N/A
214		Yes	Yes	No	No	No	No	No	No		No			No			No
215		Yes	Yes	Yes	Yes	Yes	No	Yes	Yes		No			No			No
216		Yes	Yes	No	Yes	No	Yes	Yes	No		Yes	the helpdesk software (Request Tracker, https://bestpractical.com/ we use primarily is really designed for IT helpdesks). Having actual conversations and tracking the conversation is quite difficult often. Something like slack or trello, but easily used for 100's of 'one-off' conversations would be ideal.	management software	Yes	Request Tracker, and the user interface of our LIMS (Clarity)	Neither is perfect.	N/A
217		Yes	Yes	No	No	No	No	No	No		Yes	with more collaboration and understanding	cooperation	No			No
218		Yes	Yes	Yes	Yes	Yes	No	Yes	Yes		Yes	more social media Twitter etc	social media	No			Yes	Data protection GPDR	data protection
219		Yes	Yes	Yes	No	No	No	Yes	No		No			No			Yes
220		Yes	No	No	No	No	No	No	No		No			No			No	I perform in vivo imaging, so I need to plan the entire experiment with the users (starting from the authorization process). Each experiment is different and requires a dedicated study and preparation, so I prefer to deal personally with the users.	discussion
221		Yes	Yes	No	Yes	No	No	Yes	Yes		No			No			No	problems normally too specialized - other issues can be communicated via our standard channels
222		Yes	Yes	Yes	No	Yes	No	No	No		No			No			Yes	For infrequent users or those staying for only a few months.
223		Yes	Yes	Yes	No	No	No	Yes	Yes		No			No			No
224		Yes	Yes	Yes	No	No	No	No	No		No			No			No
225		Yes	Yes	Yes	Yes	Yes	No	No	No		No			No			Yes
226		Yes	Yes	Yes	Yes	No	No	Yes	No		No			No			Yes	Programming such a platform according to our needs	implementation
227		Yes	Yes	Yes	Yes	No	No	Yes	Yes		No			No			No
228		Yes	Yes	Yes	Yes	Yes	No	No	No		Yes			No			No
229		Yes	Yes	No	No	No	No	Yes	No		No			No			No
230		Yes	Yes	No	Yes	No	No	Yes	Yes		No			No			No
231		Yes	Yes	No	No	No	No	Yes	Yes	whatsapp	Yes	I'd like a website for the facility at least on the intranet where I can post communications rather than send idiotic amounts of e-mails (mail list of 127 current users with every global facility concern; individual e-mails to notify new trainees of rules and resources at least 12 - 24 per month)	platform	No			Yes	We have too many separate website based systems to log-in to at our institution/hospital. Another log-in will just be annoying.	heterogeneity
232		No	Yes	Yes	No	No	Yes	No	No		No			Yes	Custom built system (other)	Works well	N/A
233		Yes	Yes	Yes	No	No	No	Yes	Yes		No			No			Yes	Meeting in the flesh is more productive since body language, connection in 'reading between the lines', using humor etc is often lost in online meetings or e.g. Slack conversations	discussion
234		Yes	Yes	No	No	No	No	No	No		No			No			No
235		Yes	Yes	No	Yes	No	No	No	No		Yes	Online platform for data sharing and discussion about the data.	Online platform	No			Yes	Platform should be maintained. I have currently no people to do that.	maintenance
236		Yes	Yes	Yes	Yes	No	No	Yes	Yes		No			No			No	Every project is uniq.	complexity
237		Yes	Yes	No	Yes	No	Yes	No	No		Yes	discussions (seminars) on wider background of research topics	(seminars)	Yes	ilab	just implemented	N/A
238		Yes	Yes	Yes	Yes	No	No	Yes	No		No			No			No
239		Yes	Yes	Yes	No	No	No	Yes	Yes		Yes	social media	social media	No			Yes	security issues	data protection
240		Yes	Yes	Yes	Yes	No	Yes	No	No		No			Yes	Wetransfer (other)		N/A
241		Yes	Yes	Yes	No	No	No	No	No		Yes	website communication/management software	website communication/management software	Yes	LIMS		Yes	Projects are often very specific.	complexity
242		Yes	Yes	Yes	No	No	No	No	No		No			No			Yes	maybe a communication platform would be helpful. However I do not know how to implement that.	implementation
243		Yes	Yes	Yes	Yes	No	Yes	Yes	No		Yes			Yes	SupportSystem tickets (other)	Ok	N/A
244		Yes	Yes	Yes	No	No	No	Yes	Yes		Yes	A (semi)professional management software / LIMS system would be awesome!	management software / LIMS	No			Yes	We are hardly performing standardized operation procedures, i.e. every project run at the facility is pretty unique in its structural form. I think it will be difficult to setup a communication platform that can accommodate all the project-specific needs and support the highly diverse sample preparation, data acquisition and data analysis workflows....	customisation
245		Yes	Yes	Yes	No	No	No	Yes	Yes		No			No			No
246		Yes	Yes	No	Yes	No	No	Yes	Yes		No			No			No
247		Yes	Yes	Yes	No	No	No	No	Yes		No			No			No
248		Yes	Yes	Yes	No	No	No	Yes	Yes		No			No			Yes
249		Yes	Yes	No	No	No	No	No	No		Yes			No			No
250		Yes	Yes	Yes	No	No	No	No	No		Yes			No			No
251		Yes	Yes	No	No	No	No	No	No		Yes	by social media (Twitter)	by social media	No			Yes	NO
252		Yes	Yes	No	Yes	No	No	Yes	Yes	booking system	Yes	- make them read the 1 single email that contains all relevant email - weekly facility walk-in hour (for any kind of questions)	user should read open door hour	No			No	we use a booking system, website and email. the obstacle would be too many platforms. one could consider to move communication from email and booking system into an ticket-tracker system however	overload
253		Yes	Yes	Yes	No	No	No	No	No		No			No			Yes	There are so many platforms already available that People are reluctant to use an additional one.	overload
254		Yes	Yes	Yes	No	No	yes	No	Yes		No			Yes	Service Now (other)	We focus on communication, it is key to delivering a professional service	N/A
255		Yes	Yes	Yes	Yes	No	Yes	Yes	No		No			Yes	Open Iris	Phone calls, emails and face to face communication always outperform management software, except in the criteria of making sure no one is forgotten.	N/A
256		Yes	Yes	Yes	Yes	No	No	Yes	No		Yes	staff dedicated to contacts with users	more staff	No			Yes	It could be, much it depends on the organization of the entire structure where the core facility is embedded. It would be preferable to use traceable and archivable communication systems.
257		Yes	Yes	Yes	No	No	No	Yes	No		No			No			No
258		Yes	Yes	Yes	Yes	No	No	No	No		Yes	User Group Meetings	seminars	No			No
259		Yes	Yes	Yes	Yes	No	No	Yes	No		No			Yes	LIMS		No
260		Yes	Yes	Yes	Yes	No	No	Yes	No		Yes	More advertising in intranet and other internal ways of university and hospital.	advertising	No			Yes	People need to know how to contact you, it has to be easy and without installing a program oder app. Support may need time and might be good for bigger core facilities, for smaller ones it might be more work than help.	overload
261		Yes	Yes	Yes	No	No	Yes	Yes	No		No			Yes	LIMS	direct communication works best, but is most time consuming	N/A
262		Yes	Yes	Yes	Yes	No	No	Yes	Yes		Yes	Establishing standard procedures to ensure that, when techniques are required that the facility offers, the facility gets involved early during project planning.	early involvement	No			Yes
263		Yes	Yes	Yes	No	No	No	Yes	No		Yes			No			Yes
264		Yes	Yes	Yes	No	No	No	No	No		No			No			Yes
265		Yes	Yes	Yes	Yes	Yes	No	Yes	Yes		No			No			No
266		Yes	Yes	Yes	No	No	No	Yes	No		No			No			Yes
267		Yes	Yes	Yes	No	No	No	Yes	Yes		No			No			No	Yes, I do see obstacles every day. We are inside a hospital network and barely able to use services of the university computer center.
268		Yes	Yes	Yes	No	No	No	No	No		Yes	The communication with the users would improve with a communication software.	management software.	No			Yes	No.
269		Yes	Yes	Yes	No	No	No	No	No		No			No			No	No
270		Yes	Yes	Yes	Yes	No	No	No	No		Yes	Greater faculty engagement with research facilities		No			Yes	Staff knowledge lacking and investment of time to develop.	implementation, time
271		Yes	Yes	No	No	No	No	No	No		No			No			Yes
272		Yes	Yes	Yes	No	No	Yes	No	Yes		No			Yes	One way communication (CF > user). Project tracking system (TraqBio). (other)		N/A
273		Yes	Yes	Yes	No	No	No	No	Yes		No			No			No
274		Yes	Yes	Yes	No	No	No	Yes	No		No			No			No
275		Yes	Yes	No	No	No	No	Yes	Yes		Yes	Communication can and should always be improved! The main issue to be always informed and up-to-date, in both directions (user <-> facility)		No			Yes
276		Yes	Yes	Yes	No	No	No	Yes	No		No			No			No
[truncated: 37 more columns]

## Sheet: 2bis
	How are you communicating with users?	in person, face to face	email	phone	website	social media	communication / management software	seminar, workshop	user group meeting	other	communication needs improvement	if yes, how?	how to improve communication	Are you using a communication software?	If yes, which software?	What is your experience?	Would it make sense to use a communication platform?	Would you see obstacles?	Would you see obstacles?		How are you communicating with users?	all	flow cytometry	genomics	histology	metabolomics	microscopy	mouse/rat	protein expression	proteomics		1-4	5-8	9-12	13-16	>16		1-20	21-40	41-60	61-80	81-100	> 100		communication needs improvement	all	flow cytometry	genomics	histology
1	email, website, phone, meetings	Yes	Yes	Yes	Yes		No				No			No			No	Discussing a project requires many different documents provided by the users	documents		email	266	49	33	11	8	60	15	8	32		174	54	17	8	13		122	62	33	12	10	27		yes	103	20	19	5
2	In person (English)	Yes					No				No			No			No				in person	255	44	31	10	8	60	14	8	31		168	51	15	8	13		121	60	28	10	10	26		no	173	30	14	6
3	Email, in person	Yes	Yes				No				No			No			Yes	Moderation of threads.			phone	176	29	24	6	4	36	9	7	26		112	38	10	7	9		91	42	18	7	5	13			276
4	Email, Meetings, Skype, phone, Booking System	Yes	Yes	Yes	Yes	Yes	No				No			No			No				seminars/workshops	122	27	17	5	4	31	3	6	10		73	28	10	3	8		44	28	20	7	9	14
5	Via sound waves and emails	Yes	Yes				No				No			No			No				website	110	18	18	5	3	36	3	5	10		68	27	4	4	7		39	28	14	4	10	15
6	E-Mail, Phone		Yes	Yes			No				No			No			Yes	The implementation might be a hurdle	implementation		user group meeting	83	10	9	3	1	24	3	3	7		48	16	10	3	6		35	17	10	2	3	16
7	e-mail, website, phone, animal database and most preferably direct meetings	Yes	Yes	Yes	Yes		No				No			No			Yes				communication/management software	70	13	12	3	3	12	2	3	11		41	14	7	4	4		24	16	11	6	2	11
8	Zendesk						Yes				No			Yes	Zendesk (other)	perfect	N/A				social media	32	7	5	2	1	8	0	1	2		18	8	5	0	1		10	8	7	1	1	5
9	Web forms e-mails		Yes				Yes				No			Yes	web forms / PPMS	communication with users ok, more effort in communications with PIs	N/A				other	10	3	0	2	0	3	0	0	0		7	2	1	0	0		2	0	4	0	0	4
10	website, newsletters, workshop and seminars				Yes		No	Yes		Newsletter	No			No			Yes	find the budget to hire dedicated person for communication	cost
11	bi-annual newsletter, email list per instrument, annual user meeting, incidents are reported on our reservation system (PPMS)		Yes				Yes		Yes	Newsletter	No			Yes	PPMS	communication is very important	N/A
12	By mail, by phone and through "in vivo" discussions. Discussions constitute the preferred way of communication in order to understand the biological question, make sure that the experiment has been designed properly and suggest the best approach and/or analysis type to produce the most useful data (to answer the question).	Yes	Yes	Yes			No				Yes	It can always be improved but I believe this is rather a personal issue. We should make an effort to educate researchers on the best practices while designing their experiments and collecting and storing their samples for metabolomic analysis.		No			Yes	Communication is indeed very important and I would say it relies exclusively on exchange of information and how much each person involved cares about the outcome.
13	e-mail, website, twitter		Yes		Yes	Yes	No				Yes	So I know that they are reading the information not just receiving	know that info is read	No			Yes	Maybe a good thing but still depends on the users being engaged to read	user
14	personal meetings email, phone presentations	Yes	Yes	Yes			No	Yes			No			Yes	ELN		No	we have a standardised reporting process usually with powerpoint and excel table outputs. Any platform needs to be operating system independent	heterogeneity
15	e mail, website, visual display, brochures, personal interaction, facebook	Yes	Yes		Yes	Yes	No			Brochures	Yes	more regular outreach		No			Yes	time resource	time
16	emails mainly		Yes				No				Yes			No			Yes	It should be fully searchable, and exportable in standard format.
17	Facility Induction tours, facility handbooks, user group meetings, emails, in person	Yes	Yes				No		Yes	facility handbooks	No			No			No
18	E-mail, messaging via iLabs, Telephone, face-to-face	Yes	Yes	Yes			Yes				Yes	Better overview of e-mails	management	Yes	iLab		Yes
19	personally	Yes					No				Yes			No			Yes
20	Through the core facility website and also by email		Yes		Yes		No				No			No			No	Yes, because we work with live animals and this is sensitive subject
21	Mail, Phone, Meeting	Yes	Yes	Yes			No				No			No			Yes
22	By email, by phone, by face-to-face meeting.	Yes	Yes	Yes			No				Yes	Software for project progression.	software management	No			Yes
23	Email, Twitter		Yes			Yes	No				Yes	Intranet page, local forum	website, platform	No			Yes	Don't understand it
24	E-mail, weekly meetings, github	Yes	Yes				Yes				No			Yes	github (other)		No
25	email, opening hours, scheduled meeting	Yes	Yes				Yes				Yes	website, regular updates, seminars	website, regular updates, seminars	Yes	Parkour (LIMS)		N/A
26	personell discussion before and after sample submission	Yes					Yes				Yes	Discussions are time consuming. More experienced persons in the Core facility are needed.	more staff	Yes	iLab Agilent	It is ok for management of samples and data. It does not replace discussions.	N/A
27	face2face, personal email, intranet page, automatic emails from sample tracking system	Yes	Yes		Yes		No				Yes	More users should ask for help/feedback/advice before/during experiments rather than be unhappy with data afterwards. More users should read the manuals that we provide	users should read	No			No	It's difficult to get users to use yet another communication channel. Email works quite well for us. I see that new ways of lab communication like slack are adopted very slowly. Anything where users would have to look or actively access is an obstacle	user
28	Via email or online booking system or personal meetings.	Yes	Yes				Yes				No			Yes	iLab	Works very well for our needs	N/A
29	email face-to-face	Yes	Yes				No				Yes	simple project management software - eg MS Teams with Planner and OneNote	management software -	Yes	ELN		N/A
30	Email & personal communication	Yes	Yes				No				No			No			No	Does not provide benefits & costs time/money	time, cost
31	Mail, Database		Yes				No				No			No			Yes	No
32	consulting or E-Mails	Yes	Yes				Yes				Yes			Yes	iLab		N/A
33	via email, phone, our booking platform		Yes	Yes	Yes		No				No			No			No	our students/researchers are overloaded with information, newsletters, social media, other communication channels...	overload
34	Mainly email, and in person meetings	Yes	Yes				No				Yes	More feedback of users which is kind of lacking	feedback of users	No			Yes	implementation by our IT department	implementation
35	Home made LIMS system. Meeting in person.	Yes					Yes				No			Yes	home made LIMS		N/A
36	email personally phone openIris scheduler	Yes	Yes	Yes			Yes				No			Yes	Open IRIS		No	Users are overwhelmed with the different means of communication. We have a strict rule that people using the core facility have to read their email for information. Also the scheduling software uses email to "communicate". We do not communicate via private means (mobile phone, whats app, etc.). To add an additional means of communication would not be more efficient.	overload
37	Via email and Skype mostly, sometimes via telephone.		Yes	Yes		Yes	Yes				Yes	More streamlined, ticketing system, less pressure to answer immediately.	management	Yes	YouTrack software with home-made website built on top of it (other)	Communication is almost a full-time job. It falls apart in 2 different aspects: practical/organization issues and scientific/expert advice. Ideally those can be covered by different people or teams. The expert advice takes most time and is basically a consultancy job. Myself and many core facilities manager colleagues have to care of both types of communication which makes the job rather heavy. I…	N/A
38	First time user can always approach us in person and via email. We send first time users the link to new user project questions - asking user to describe their project, then a) general personal introductory session is scheduled for small group of new users - once a wee - to talk about how to use the Light Microscopy Facility ( LMF), user guidelines, administration and safety aspects , LMF staff m…	Yes	Yes		Yes		No		Yes		Yes	I feel that we could have better documented the follow-up regarding the user projects, yet there is also issue of the capacity of the LMF staff - with 4 staff members we have to process 240 users per year many of them with multiple requests. While we feel that we are quite good at the initial phase with users to get them started in our LMF, we feel that time for follow-up is rather limited and th…	better follow-up, more staff	Yes	ELN		Yes	In case that we move to communication platform - we have to make sure that this is SINGLE ENTRY POINT EASY TO USE for users and LMF staff and for all services and facilities in the institute. Users should not be forced to communicate with different services and facilities using different communication tools. Yet , in case that there is one communication platform - it still must reflect the needs …	heterogeneity, complexity, user
39	Facility email address, open office hours, walk-up lab access	Yes	Yes				No				Yes	- automated progress tracking and reporting for users after log-in - automated invoicing	- automation	No			Yes	Faculty is too slow to purchase one.
40	e-mail or in person (phone, less frequently)	Yes	Yes	Yes			No				Yes	writing emails is good because the information remains recorded, but takes a lot of time		No			Yes	It depends , I have no idea what you mean with " communication platform"
41	mostly e-mail and in person	Yes	Yes				No				No			No			No
42	Phone email meetings	Yes	Yes	Yes			No				No			No			No
43	Email		Yes				No				No			No			No	I do not see obstacles but the fact is that there is presently no need for a true communication platform
44	E-Mail, phone, Messenger service such as Whattsapp, in person	Yes	Yes	Yes		Yes	No				No			No			Yes
45	email, informatics system		Yes				Yes				No			Yes	Agendo	Good	N/A
46	Helpdesk tickets, 1:1, email, seminars, user groups and a specialised Core Facility Management Software	Yes	Yes				Yes	Yes			Yes	To run a technology club to advertise to a wider audience any new technologies or equipment that comes into the Core	advertising	Yes	Stratocore PPMS and Helpdesk	Helpdesk software is very useful for tracking user requests. PPMS software is useful for understanding user base for equipment, and communicating when equipment is booked or not available.	N/A
47	personal communication, e-mail, intranet-site, labfolder (electronical notebook), bulletin board	Yes	Yes		Yes		Yes			bulletin board	No			Yes	restyaboard, ELN	I am just starting doing to set it up myself. I have been invited to an other group using Trello. It is very usefull to organize workflows. In addition, we are using an electronical lab book which is shared within the group and users. The electronical lab book has improved the documentation and my people are better organized.	N/A
48	Personal interactions email	Yes	Yes				No				No			No			No
49	email, phone, personally	Yes	Yes	Yes			No				No			No			No
50	email and online booking software		Yes		Yes		No				No			No			No	too many different options dont work for us, users don't read (e.g. please contact us via online scheduler) so they just send an email and ask what they have to do.	user
51	email and personal contact	Yes	Yes				No				No			No			No
52	through emails and annual user meetings		Yes				No		Yes		No			No			No
53	Interactive database (PyRAT), email, telephone, personally	Yes	Yes	Yes			Yes				Yes	One always wants better communication, although we are fairly happy with the way it works at the moment. The shortcomings are typically human (forgetfulness, cultural)	user cooperation	Yes	PyRAT (other)	Excellent, although PyRAT is not really communication software, but it handles work requests well	N/A
54	Website and email		Yes		Yes		No				Yes			Yes	LIMS		Yes
55	In order of frequency: Email/PPMS and face to face with highest frequency, we also have a user booklet, then twitter, yammer, seminars, inviting users to our retreats/weekly meeting to present on their projects. Starting up a user group meeting again in the new year - every 6 months to start with. The last one failed but that was over 3/4 years ago and was possibly too frequent. Our intranet is o…	Yes	Yes			Yes	Yes	Yes	Yes	booklet	Yes	As per the above future actions		Yes	MS-SharePoint, PPMS	Sharepoint is new and not set up yet for our core to maximize use. To date PPMS and outlook has been the most used electronic communication system.	N/A
56	Directly face to face or via E-mail or in special workshop with specific topics	Yes	Yes				Yes	Yes			Yes	Users are not using directly online communication even if we have it on the desktop of all set-ups	User cooperation	Yes	MS-SharePoint (other)	Users are not using directly online communication even if we have it on the desktop of all set-ups	N/A
57	email, in person, phone	Yes	Yes	Yes			No				No			No			No
58	General info: website Personal communication by email, phone		Yes	Yes	Yes		No				Yes	Better presentation of information on website (fees, procedures, offered services) Regular and better feedback during course of projects e.g. reaching of milestones. Trying to minimize „lost” unanswered emails	website, feedback, management	No			Yes	Additional platforms for single core facilities will not be accepted by users: too high investment in registration / installation. Combined platform for all facilities could be attractive. Optimized email communication is sufficient (e.g. with ticketing system).	overload
59	Phone, E-Mail, Homepage, Face-to-face, seminars	Yes	Yes	Yes	Yes		No	Yes			Yes	More seminars	More seminars	No			Yes	Data protection, as hospital	data protection
60	booking platform e-mail telephone		Yes	Yes	Yes		No				Yes	no e mail ping pong		No			Yes
61		Yes	Yes	Yes	No	No	No	Yes	No		Yes	Having a kind of a chat system along with project/sample administration. Each users' project would have a chat possibility with archiving properties so that every step can be traced and attributed to a tagged project.	chat, management	No			Yes	generally, no.
62		Yes	Yes	Yes	No	No	No	No	No		No			No			Yes
63		Yes	Yes	Yes	Yes	No	No	Yes	No		Yes	dedicated management software	dedicated management software	No			Yes	Yes for automated communication regarding system status, feedback. Individualized and fragmented software platforms for operating systems, active directories, management systems, etc. No for any other type of communication like general communication.	complexity
64		Yes	Yes	Yes	No	No	No	Yes	No		No			No			No	Higher workload to manage additional communication platform.	maintenance
65		Yes	Yes	Yes	No	No	Yes	Yes	No		Yes	tool that combines project management, ELN, invoicing, user communication	management	Yes	Open IRIS, ELN		Yes	IP related Content (patent-related stuff)	data protection
66		Yes	Yes	Yes	No	Yes	No	No	Yes		No			No			No
67		Yes	Yes	Yes	Yes	No	No	Yes	Yes		No			No			No	Already to much information via usual channels (Email etc etc)	overload
68		Yes	Yes	Yes	No	No	No	No	No		No			No			No
69		Yes	No	No	Yes	No	No	No	Yes		Yes			No			Yes
70		Yes	Yes	Yes	No	No	Yes	Yes	Yes		No			Yes	Open IRIS		N/A
71		Yes	Yes	Yes	No	No	No	No	No		No			No			No
72		Yes	Yes	Yes	Yes	No	No	Yes	Yes		No			No			Yes	user and instrument group platforms, probably including new media may be the future, but is hard to realize in an academic environment with all the GDPR regulations Universities are confronted with	data protection
73		Yes	Yes	Yes	No	No	Yes	Yes	Yes		No			Yes	ELN		Yes	We established a electronic notebook, where we also can share information. It would be great if communication and booking could be within that system. Otherwise one has to many different programs.	heterogeneity
74		Yes	Yes	Yes	No	No	No	No	No		No			No			No
75		Yes	Yes	Yes	Yes	No	No	No	Yes		No			No			Yes
76		Yes	Yes	Yes	No	No	No	No	Yes		No			Yes	ELN		No	each project is custom/unique	complexity
77		Yes	Yes	Yes	Yes	No	No	No	No		Yes	I would prefer a better communication in advance, means before the experiments starts, because then we have influence about all the details which are important for a significant assay	early communication	No			Yes	no
78		Yes	Yes	Yes	No	No	No	No	No		No			No			No
79		Yes	Yes	Yes	Yes	No	No	Yes	No		No			No			Yes	keeping the software updated	maintenance
80		Yes	Yes	Yes	Yes	No	No	Yes	No		Yes	Management software for e.g. booking, user and project management, Q&A, follow-up on Projects/publications	Management software	No			Yes	Data protection, regular updates, proper user/project management	data protection, maintenance
81		Yes	Yes	Yes	No	No	No	No	No		No			No			No	For peptides it would be possible, for all other synthesis the differences between the orders are too much	complexity
82		Yes	Yes	Yes	No	No	No	Yes	No		No			No			No
83		Yes	Yes	Yes	No	Yes	No	No	No		No			No			No
84		Yes	Yes	Yes	Yes	No	Yes	No	No		No			Yes	Open IRIS	It is a good system with some peculiarities and sometimes very slowly. E-Mail contact is often used too. Often a personal face to face meeting is very helpful to understand the research questioning and to give optimal consultation.	N/A
85		Yes	Yes	Yes	No	No	No	No	Yes		No			No		This works fine especially with international collaborations.	N/A
86		Yes	Yes	No	Yes	No	No	Yes	Yes		Yes			No			Yes
87		Yes	Yes	Yes	Yes	No	Yes	Yes	No		Yes	???		Yes	PPMS	Good, but not excellent	N/A
88		No	Yes	Yes	Yes	No	No	Yes	No		No			No			Yes	we have already tools for booking instruments.... new tools would be better implemented in this web application
89		Yes	Yes	Yes	Yes	No	No	Yes	No		No			No			No
90		Yes	Yes	Yes	No	No	No	No	Yes		No			No			No	usually we better understand the problems in a face to face explanation/ chat	discussion
91		Yes	Yes	Yes	Yes	No	No	No	Yes		No			No			No
92		Yes	Yes	No	Yes	Yes	No	Yes	Yes		No			No			No
93		Yes	Yes	Yes	No	No	No	No	No		No			No			No
94		Yes	Yes	Yes	Yes	No	No	No	No		No			No			No	more time-consuming	time
95		Yes	Yes	Yes	Yes	No	No	Yes	Yes		Yes	We have several different categories of equipment and several different categories of users. It would be nice to be able to more easily contact users by category/specific instrument in order to send announcements, notifications of service issues, etc.	management	No			Yes	We have a large number of users and these users frequently fluctuate or change. I foresee a difficulty in being able to keep the platform up to date. I also see a difficulty in integrating it with our computer center here. We get very little IT support here.	maintenance, complexity
96		Yes	Yes	No	No	No	Yes	Yes	No		Yes			Yes	iLab Agilent	it is important. As always there are some steps which would be nice to improve.	N/A
97		Yes	Yes	No	No	Yes	Yes	Yes	No		Yes	respectful interactions would help	user cooperation	Yes	Slack, LIMS	this helps efficiency, but it reduces visibility	N/A
98		Yes	Yes	Yes	Yes	Yes	Yes	Yes	No		Yes	Better social media, more straight ticket, automation of requests	social media, automation	Yes	Zendesk, LIMS	good	N/A
99		Yes	Yes	Yes	No	No	No	No	No		No			No			Yes
100		Yes	Yes	Yes	No	No	No	No	Yes		No			No			Yes	Im not sure if all the users would use a new platform. More likely we get a mix which is then confusing	user
101		Yes	Yes	Yes	Yes	No	Yes	Yes	Yes		No			Yes	OTRS, Zammad (other)	Generally positive. Sometimes tedious to configure and it still need discipline.	N/A
102		Yes	Yes	Yes	Yes	No	No	Yes	No		No			No			Yes
103		Yes	Yes	Yes	No	No	No	No	No		No			No			Yes
104		Yes	Yes	Yes	Yes	No	No	No	Yes		No			No			Yes	Installing/managing the software	maintenance
105		Yes	Yes	Yes	No	No	No	No	No		Yes	regular seminars/workshop to get familiarized with the methods and work-flow of our service; so that expectations (time-line) and interpretation become real....	seminars	No			No	I prefer face -to-face communication/interaction	discussion
106		Yes	Yes	No	Yes	No	No	Yes	No		Yes			No			No
107		Yes	Yes	Yes	No	No	No	Yes	Yes		No			No			Yes
108		Yes	Yes	No	Yes	No	Yes	Yes	Yes		Yes	It is good overall but if we could reach even more users that would be great.	visibility	Yes	Stratocore PPMS	It works well for users who are already using the facility	N/A
109		Yes	Yes	Yes	Yes	No	Yes	Yes	No		Yes	better tracking systems for users to know how far in the analysis their samples are	management	Yes	PPMS	not ideal for the applications at the facility	N/A
110		Yes	Yes	Yes	No	Yes	Yes	Yes	No		Yes			Yes	AGENDO	Really great, is a very nice s¡platform	N/A
111		Yes	Yes	Yes	Yes	Yes	No	Yes	Yes		Yes	Better communicate to get feedbacks and discover new users	t feedbacks visibility	No			Yes	We are not tracking correctly contacts and user information.
112		Yes	Yes	Yes	Yes	Yes	No	Yes	No		No			No			Yes
113		Yes	Yes	Yes	No	No	Yes	No	No		No			Yes	PPMS	It is perfect for booking appointments or time on the instruments. The first contact and meeting for sort projects still need to be done by phone or email.	N/A
114		Yes	Yes	No	Yes	No	Yes	Yes	No		No			Yes	Open IRIS	Works well but is sometimes a bit slow	N/A
115		Yes	Yes	Yes	No	No	No	No	Yes		No			No			No
116		Yes	Yes	No	No	No	No	Yes	Yes		No			No			No
117		Yes	Yes	No	No	Yes	No	No	No		No			No			No	too much communication is not helpful. Today, our students and users receive a lot of information every day from all the other laboratories and cores. We must find the best compromise possible to communicate with them in order to transmit only useful information ....	overload
118		Yes	Yes	Yes	Yes	No	No	Yes	No		No			Yes	LIMS		Yes	No, except that most users are used to communicate directly with the platform staff	discussion
119		Yes	Yes	Yes	Yes	Yes	No	Yes	No		Yes	I would like to be sure that my users read the microscopes checkup emails we send every months.	know that user read	No			No	Time consuming : we already have mails, twitter, reservation center, image database... too much software to handle.	time, overload
120		Yes	Yes	Yes	No	No	No	No	No		No			No			No	I answered yes to the question above, but one has to define what is meant. Concretely, what is a communication platform ? The worry is that we end up spending even more of our time (it is already a lot...) discussing with users. I would rather try to find ways to have users to learn a little bit more by themselves.
121		Yes	Yes	Yes	Yes	No	Yes	No	No		No			Yes	OCF Scheduler Ver. 2.03 (other)	For informing users about system downs it is not convenient but absolutely sufficient. All other communication tasks are solved by personal communication.	N/A
122		Yes	Yes	No	Yes	Yes	No	No	Yes		No			No			Yes
123		Yes	Yes	Yes	Yes	No	Yes	Yes	Yes		Yes	Involving more the users in the core facility development	Involve the users in development	Yes	Outlook and PPMS	good but insufficient	N/A
124		Yes	Yes	Yes	Yes	No	Yes	Yes	No		No			Yes	Open IRIS		N/A
125		Yes	Yes	Yes	No	No	Yes	No	No		Yes			Yes	in-house (other)		N/A
126		Yes	Yes	Yes	Yes	Yes	No	Yes	No		No			No			No	I would like to improve the communication with the PIs, users leave the facilities after 2-5 years. PIs influence the development of the facility 10-30 years!
127		Yes	Yes	Yes	No	No	No	No	No		No			No			No
128		Yes	Yes	No	Yes	No	Yes	Yes	Yes		No			Yes	Clustermarket (other)	It's new and I'm still trialling it, but so far ok.	N/A
129		Yes	Yes	No	Yes	No	No	No	Yes		Yes	I would like them to understand things better	cooperation	No			No	GDPR, our IT systems	data protection
130		Yes	Yes	No	No	No	Yes	Yes	No		Yes	We often send emails to our users containing important information and it is apparent that not everyone bothers to read these emails. Finding a way to ensure that they do read the emails or a more effective way of relaying information would be helpful.	ensure users read	Yes	PPMS	We love it. It is an excellent booking and financial management system. It also gives us a way of recording all communication pertaining to a particular piece of work/training etc	N/A
131		Yes	Yes	Yes	No	No	No	No	No		No			No			No
132		Yes	Yes	No	Yes	No	No	Yes	Yes		Yes	I think younger users respond better to social media and I should look to offer notifications via this route	social media	No			Yes	Cost. Data protection.	cost, data protection
133		Yes	Yes	No	Yes	No	Yes	No	No		No			Yes	agendo, Slack, LIMS		N/A
134		Yes	Yes	No	No	No	No	No	No		No			No			No
135		Yes	Yes	No	Yes	No	Yes	No	No		Yes	integrate an instant messaging in the platform syste (so not to rely on other "public" services like whatsapp)	chat	Yes	Booked-scheduler (other)	Very good for planning, limited ability for communication (mailing list + alerts on the website)	N/A
136		Yes	Yes	Yes	Yes	No	No	Yes	No		Yes	More support to do this provided by the university		No			Yes
137		Yes	Yes	Yes	No	No	No	Yes	No		No			No			No
138		Yes	No	No	No	No	No	No	No		No			No			No
139		Yes	Yes	Yes	No	Yes	No	No	No		No			No			No	e-mail works very well. Where I've used communication software to communicate with other platforms, for example some branches of computing infrastructure support, it's been far more of a hindrance than a help.
140		Yes	Yes	Yes	No	No	No	No	Yes		No			No			No
141		Yes	Yes	No	No	Yes	No	Yes	Yes		Yes	The reach for each of these methods is low, we try to have as many as possible but it is still hard to get information across.		No			Yes	It would need to be something used by all cores. Something that seems quite difficult to achieve!	heterogeneity
142		Yes	Yes	Yes	Yes	No	No	Yes	Yes		No			No			No	setup working between 2 organizations	heterogeneity
143		Yes	Yes	No	No	No	No	Yes	No		No			No			No
144		Yes	Yes	Yes	No	No	No	Yes	No		Yes	better website, social media as well as more "show and tell" type opportunities	website, social media, seminars	No			No	Even though the idea is good, most people already are overwhelmed with information overload and may be resistant to subscribing to another platform	overload
145		Yes	Yes	No	Yes	Yes	Yes	Yes	Yes		No			Yes	Microsoft Teams and iLab (Agilent)		N/A
146		Yes	Yes	No	No	No	No	No	No		Yes			No			Yes
147		Yes	Yes	Yes	No	No	No	Yes	No		No			No			Yes
148		Yes	Yes	Yes	Yes	No	No	Yes	No		Yes	Having more time per user would be good.	more time .	No			No
149		Yes	Yes	Yes	No	No	No	Yes	Yes		No			No			No
150		Yes	Yes	No	No	No	No	No	Yes		Yes	web based chat for routine communication	chat	No			Yes
151		Yes	Yes	No	Yes	No	No	Yes	No		No			No			No
152		Yes	Yes	No	No	No	No	Yes	No	announcements on Schedule	Yes	I think there is a LOT that can be communicated, but every person needs to know something different. Putting too much out there, or having announcements/signs seems to create sign blindness and no one looks at it.	user cooperation	No			No	one more thing to register, keep up with, pay for?	maintenance, cost
153		Yes	Yes	Yes	Yes	No	No	Yes	No		Yes			No			Yes
154		Yes	Yes	No	No	No	No	No	No		Yes			No			Yes	Time	time
155		Yes	Yes	No	No	No	No	No	No		No			No			No
156		Yes	Yes	No	Yes	No	No	No	Yes		No			No			No	Fragmentation, - different groups want to use different platforms lack of adoption - I refuse to use anything that requires me to install software on my own devices. I've tried slack, teams & trello and given up on all of them as merely gimmicks	heterogeneity
157		Yes	Yes	No	No	Yes	yes	Yes	No	Slack	Yes			Yes	Slack What'sApp	Even though I've set up a Slack page to report instrument issues - users are resistant to using it. They seem to prefer email or phone call - which i am less likely to respond to (i don't check emails out of hours or answer my phone - whereas instant messenger i am much more likely to respond to - it's also easier to fix issues over instant messenger as opposed to email, especially whilst sorting…	N/A
158		Yes	Yes	Yes	Yes	No	No	Yes	No		No			No			No
159		Yes	Yes	Yes	Yes	No	No	No	No		No			No			No
160		Yes	Yes	Yes	No	No	No	No	No		Yes	by using a software	management software	No			Yes
161		Yes	Yes	No	No	No	No	Yes	Yes		Yes	More automated communication to save users asking for updates that take up staff time	automation	No			Yes	We are actually investigating service now to have automated communication steps but are trying to tie this in with other softwares for data storage (such as filemaker)
162		Yes	Yes	Yes	Yes	No	No	No	Yes		Yes	standardized workflows for exchange of documents and improved internal project management and documentation	management	No			Yes	data protection issues (human data)	data protection
163		Yes	Yes	No	Yes	Yes	No	Yes	No		No			No			No
164		Yes	Yes	Yes	Yes	No	No	Yes	No		No			No			No
165		Yes	Yes	Yes	No	No	No	Yes	No		No			Yes	LIMS		No	In my opinion, all projects are best approached with a REAL conversation. This may be more true for metabolomics (where each experiment is carefully tailored to the individual) than other fields	discussion
166		Yes	Yes	No	No	No	Yes	No	Yes		Yes	More face to face discussion with them BEFORE projects start	early communication	Yes	PPMS.	It works ok, but as they get so many emails from PPMS, some of our messages fall between the cracks. Face to face is better but we have over 80 groups that use us so this is not always feasible.	N/A
167		Yes	Yes	Yes	No	No	Yes	Yes	Yes		No			Yes	Qualtrics (other)	Works well for surveys	N/A
168		Yes	Yes	Yes	No	No	No	No	No		No			No			Yes
169		Yes	Yes	Yes	No	No	No	Yes	Yes		No			No			Yes	It is hard to say without seeing the type of software we are talking about
170		Yes	Yes	No	Yes	No	No	No	No		Yes	The problem seems to be getting them to listen, as we send out information but they don't read it	users don't read	No			No	We already have too many different platforms for people to ignore	overload
171		Yes	Yes	No	No	No	Yes	No	No		Yes	Ideally users would have greater visibility of all of the work that is done for them rather than just the final outcome	visibility	Yes	Microsoft Teams; we are currently trialing ServiceNow, (other)	We searched long and hard for a usable Electronic notebook that could enable easy communication with users, record all of the different activities of facility staff, project progression and machine use etc but there isnt a single solution that was easy to implement locally	N/A
172		Yes	Yes	Yes	Yes	No	Yes	Yes	Yes		No			Yes	own software for ordering of services allows us to use chat and discussion forum (other)	very positive feedback from users	N/A
173		Yes	Yes	Yes	No	No	Yes	Yes	No		No			Yes	PPMS	Good	N/A
174		Yes	Yes	Yes	No	No	No	Yes	Yes		No			No			Yes
175		Yes	Yes	Yes	Yes	No	No	Yes	Yes		Yes	Greater awareness of our facilities nationally would be good. Have operated for 10 years but still surprising to meet individual researchers who have never heard of our existence. Also, would be great to increase the proportion of users that actually read our guidelines on how to use our facilities.	visibility. users actually read	Yes	LIMS		No	I'm sceptical, but open to suggestion. I prefer to use one channel of communication where possible, thereby everyone knows that essential info and communications go by that route. At the moment that channel is largely email, and I'd need a lot of convincing this can be improved.	heterogeneity
176		Yes	Yes	Yes	No	No	No	Yes	Yes		No			No			Yes	no
177		Yes	Yes	Yes	Yes	No	No	No	No		Yes	Communication software would be an interesting idea.	management software	No			Yes	The willingness of users to use it.	user
178		Yes	Yes	Yes	Yes	No	Yes	No	Yes		Yes	I would like to have the user report problems directly to me more often - now they sometimes just tell each other or make a small note in the paper user log and the information does not reach me or others in time. Then we find e.g. an instrument malfunction as an unpleasant surprise when coming to the instrument with samples already prepared etc. feedback	feedback	Yes	Agendo booking system. It allows for sending messages also.	The booking platform works fine, but I suspect that users are not always reading the messages sent through it, or it is considered spam as their email filters.	N/A
179		Yes	Yes	Yes	No	No	No	Yes	No		No			No			Yes	Limited time to keep all communication lines alive and updated.	time
180		Yes	Yes	Yes	Yes	No	No	Yes	No		No			No			No	it is better to use available comm. methods. People are reluctant to learn and use a new software (a separate login needed etc). An email list or a simple digital calendar should be enough to communicate. They already check their emails regularly for important messages and our digital reservation calendar is self explanatory.	overload
181		Yes	Yes	Yes	Yes	No	No	No	No		Yes	We would like to improve our communication to potential new users and be more visible	visibility	No			No
182		Yes	Yes	No	No	No	No	No	No		Yes	We intend to develop a web based platforms to get informations about the samples and plans.	platform	No			Yes	We provide many kind of service (QPCR, NGS, RNA integrity checking), maybe it is difficult to find an optimal platform to communicate with all kind of users.	complexity
183		Yes	Yes	Yes	No	No	No	No	No		Yes	By organizing seminars.	seminars.	No			Yes	Not at this point.
184		Yes	Yes	No	No	No	Yes	No	No		No			Yes	iLabs	This is fine for me	N/A
185		Yes	Yes	Yes	Yes	No	Yes	Yes	Yes		Yes			Yes	supportsystems.com (other)	ok, but can be improved	N/A
186		Yes	Yes	Yes	No	No	No	No	No		No			No			Yes	The small volume of our core facility that provides clinical chemistry services on an automated analyser is largely manageable without dedicated software. However, a simple software platform could help us to do work in a more time-efficient manner.
187		Yes	Yes	Yes	Yes	No	No	Yes	Yes		Yes			No			Yes
188		Yes	Yes	Yes	No	No	No	No	No		No			No			No	I'm not sure. Unless, confidentiality is guaranteed.	data protection
189		Yes	Yes	Yes	No	No	Yes	Yes	No		No			Yes	proprietary system for booking of instrumental time (other)	Mixed. An automation of processes inside the SW system is not flawless	N/A
190		Yes	Yes	No	No	No	No	No	No		Yes	PI's are often absent from the whole process. With the PI's still need to learn a lot about the technologies and their PhDs and Post-Docs still having a smaller experience, the PI's would need to be present in the discussion for the whole process to work end-to-end.	PI involvement	No			Yes
191		Yes	Yes	Yes	No	No	No	Yes	No		No			No			No
192		Yes	Yes	Yes	No	No	No	No	Yes		No			No			Yes
193		Yes	Yes	No	No	No	No	Yes	Yes		No			No			No
194		Yes	Yes	Yes	No	No	No	No	No		Yes	Management software	Management software	No			Yes
195		Yes	Yes	No	No	No	Yes	No	Yes		No			Yes	slack		N/A
196		Yes	Yes	Yes	No	No	Yes	No	Yes		No			Yes	our own ordering system (other)	we are happy with that, most of users, too	N/A
197		Yes	Yes	Yes	Yes	No	No	No	No		No			No			No	Communication face-to-face is efficient, communication trough platforms more easily resulting in misunderstanding	discussion
198		Yes	Yes	No	No	Yes	Yes	Yes	Yes		Yes	anyway which is relevant to the up and coming scientists where email is not impactful		Yes	slack	ok, but concerns about being on the cloud	N/A
199		Yes	Yes	Yes	No	No	No	No	No		No			No			Yes	not really, as long as I could have a private/ secured communication with each individual collaborators
200		Yes	Yes	Yes	Yes	Yes	Yes	Yes	No		No			Yes	RedMine (other)	We adapted the software to our needs.	N/A
201		Yes	Yes	Yes	Yes	No	No	Yes	No		No			No			No
202		Yes	Yes	Yes	No	No	yes	Yes	Yes		No			Yes	Skype, Polybox (other)	Often technical problems concerning the firewall settings in the hospital environment	N/A
203		Yes	Yes	No	Yes	No	No	Yes	No		No			No			Yes
204		Yes	Yes	Yes	Yes	No	Yes	Yes	No		No			Yes	IRIS		N/A
205		Yes	Yes	Yes	No	No	No	No	No		No			No			No
206		Yes	No	No	No	No	Yes	No	Yes		No			Yes	in house developed (other)	very good system to provide Data	N/A
207		Yes	Yes	Yes	Yes	No	No	No	No		No			No			Yes
208		Yes	Yes	Yes	No	No	No	Yes	No		No			No			No
209		Yes	Yes	Yes	No	No	No	No	No		No			No			No	We prefer face-to-face meetings to discuss projects in detail. In this way, users can profit best from our year-long experience and optimize their experiments to ensure optimal data quality.	discussion,
210		Yes	Yes	Yes	Yes	No	Yes	No	No		Yes	specialized automation and communication software / environment	automation and management software /	Yes	Slack, custom database - robot solutions	High maintenance - but highly flexible	N/A
211		Yes	Yes	Yes	Yes	No	No	Yes	Yes		Yes	Platform for sharing best practice for facility-user and user-user	Platform	No			Yes	Too many different pieces of software used by different groups so slow to take up another tool. Ideally there would be one tool used across many different areas of the university.	heterogeneity
212		Yes	Yes	Yes	Yes	No	Yes	Yes	Yes		No			Yes	ppms	ok	N/A
213		Yes	Yes	No	No	No	Yes	No	No		No			Yes	iLabs		N/A
214		Yes	Yes	No	No	No	No	No	No		No			No			No
215		Yes	Yes	Yes	Yes	Yes	No	Yes	Yes		No			No			No
216		Yes	Yes	No	Yes	No	Yes	Yes	No		Yes	the helpdesk software (Request Tracker, https://bestpractical.com/ we use primarily is really designed for IT helpdesks). Having actual conversations and tracking the conversation is quite difficult often. Something like slack or trello, but easily used for 100's of 'one-off' conversations would be ideal.	management software	Yes	Request Tracker, and the user interface of our LIMS (Clarity)	Neither is perfect.	N/A
217		Yes	Yes	No	No	No	No	No	No		Yes	with more collaboration and understanding	cooperation	No			No
218		Yes	Yes	Yes	Yes	Yes	No	Yes	Yes		Yes	more social media Twitter etc	social media	No			Yes	Data protection GPDR	data protection
219		Yes	Yes	Yes	No	No	No	Yes	No		No			No			Yes
220		Yes	No	No	No	No	No	No	No		No			No			No	I perform in vivo imaging, so I need to plan the entire experiment with the users (starting from the authorization process). Each experiment is different and requires a dedicated study and preparation, so I prefer to deal personally with the users.	discussion
221		Yes	Yes	No	Yes	No	No	Yes	Yes		No			No			No	problems normally too specialized - other issues can be communicated via our standard channels
222		Yes	Yes	Yes	No	Yes	No	No	No		No			No			Yes	For infrequent users or those staying for only a few months.
223		Yes	Yes	Yes	No	No	No	Yes	Yes		No			No			No
224		Yes	Yes	Yes	No	No	No	No	No		No			No			No
225		Yes	Yes	Yes	Yes	Yes	No	No	No		No			No			Yes
226		Yes	Yes	Yes	Yes	No	No	Yes	No		No			No			Yes	Programming such a platform according to our needs	implementation
227		Yes	Yes	Yes	Yes	No	No	Yes	Yes		No			No			No
228		Yes	Yes	Yes	Yes	Yes	No	No	No		Yes			No			No
229		Yes	Yes	No	No	No	No	Yes	No		No			No			No
230		Yes	Yes	No	Yes	No	No	Yes	Yes		No			No			No
231		Yes	Yes	No	No	No	No	Yes	Yes	whatsapp	Yes	I'd like a website for the facility at least on the intranet where I can post communications rather than send idiotic amounts of e-mails (mail list of 127 current users with every global facility concern; individual e-mails to notify new trainees of rules and resources at least 12 - 24 per month)	platform	No			Yes	We have too many separate website based systems to log-in to at our institution/hospital. Another log-in will just be annoying.	heterogeneity
232		No	Yes	Yes	No	No	Yes	No	No		No			Yes	Custom built system (other)	Works well	N/A
233		Yes	Yes	Yes	No	No	No	Yes	Yes		No			No			Yes	Meeting in the flesh is more productive since body language, connection in 'reading between the lines', using humor etc is often lost in online meetings or e.g. Slack conversations	discussion
234		Yes	Yes	No	No	No	No	No	No		No			No			No
235		Yes	Yes	No	Yes	No	No	No	No		Yes	Online platform for data sharing and discussion about the data.	Online platform	No			Yes	Platform should be maintained. I have currently no people to do that.	maintenance
236		Yes	Yes	Yes	Yes	No	No	Yes	Yes		No			No			No	Every project is uniq.	complexity
237		Yes	Yes	No	Yes	No	Yes	No	No		Yes	discussions (seminars) on wider background of research topics	(seminars)	Yes	ilab	just implemented	N/A
238		Yes	Yes	Yes	Yes	No	No	Yes	No		No			No			No
239		Yes	Yes	Yes	No	No	No	Yes	Yes		Yes	social media	social media	No			Yes	security issues	data protection
240		Yes	Yes	Yes	Yes	No	Yes	No	No		No			Yes	Wetransfer (other)		N/A
241		Yes	Yes	Yes	No	No	No	No	No		Yes	website communication/management software	website communication/management software	Yes	LIMS		Yes	Projects are often very specific.	complexity
242		Yes	Yes	Yes	No	No	No	No	No		No			No			Yes	maybe a communication platform would be helpful. However I do not know how to implement that.	implementation
243		Yes	Yes	Yes	Yes	No	Yes	Yes	No		Yes			Yes	SupportSystem tickets (other)	Ok	N/A
244		Yes	Yes	Yes	No	No	No	Yes	Yes		Yes	A (semi)professional management software / LIMS system would be awesome!	management software / LIMS	No			Yes	We are hardly performing standardized operation procedures, i.e. every project run at the facility is pretty unique in its structural form. I think it will be difficult to setup a communication platform that can accommodate all the project-specific needs and support the highly diverse sample preparation, data acquisition and data analysis workflows....	customization
245		Yes	Yes	Yes	No	No	No	Yes	Yes		No			No			No
246		Yes	Yes	No	Yes	No	No	Yes	Yes		No			No			No
247		Yes	Yes	Yes	No	No	No	No	Yes		No			No			No
248		Yes	Yes	Yes	No	No	No	Yes	Yes		No			No			Yes
249		Yes	Yes	No	No	No	No	No	No		Yes			No			No
250		Yes	Yes	Yes	No	No	No	No	No		Yes			No			No
251		Yes	Yes	No	No	No	No	No	No		Yes	by social media (Twitter)	by social media	No			Yes	NO
252		Yes	Yes	No	Yes	No	No	Yes	Yes	booking system	Yes	- make them read the 1 single email that contains all relevant email - weekly facility walk-in hour (for any kind of questions)	user should read open door hour	No			No	we use a booking system, website and email. the obstacle would be too many platforms. one could consider to move communication from email and booking system into an ticket-tracker system however	overload
253		Yes	Yes	Yes	No	No	No	No	No		No			No			Yes	There are so many platforms already available that People are reluctant to use an additional one.	overload
254		Yes	Yes	Yes	No	No	yes	No	Yes		No			Yes	Service Now (other)	We focus on communication, it is key to delivering a professional service	N/A
255		Yes	Yes	Yes	Yes	No	Yes	Yes	No		No			Yes	Open Iris	Phone calls, emails and face to face communication always outperform management software, except in the criteria of making sure noone is forgotten.	N/A
256		Yes	Yes	Yes	Yes	No	No	Yes	No		Yes	staff dedicated to contacts with users	more staff	No			Yes	It could be, much it depends on the organization of the entire structure where the core facility is embedded. It would be preferable to use traceable and archivable communication systems.
257		Yes	Yes	Yes	No	No	No	Yes	No		No			No			No
258		Yes	Yes	Yes	Yes	No	No	No	No		Yes	User Group Meetings	seminars	No			No
259		Yes	Yes	Yes	Yes	No	No	Yes	No		No			Yes	LIMS		No
260		Yes	Yes	Yes	Yes	No	No	Yes	No		Yes	More advertising in intranet and other internal ways of university and hospital.	advertising	No			Yes	People need to know how to contact you, it has to be easy and without installing a program oder app. Support may need time and might be good for bigger core facilities, for smaller ones it might be more work than help.	overload
261		Yes	Yes	Yes	No	No	Yes	Yes	No		No			Yes	LIMS	direct communication works best, but is most time consuming	N/A
262		Yes	Yes	Yes	Yes	No	No	Yes	Yes		Yes	Establishing standard procedures to ensure that, when techniques are required that the facility offers, the facility gets involved early during project planning.	early involvement	No			Yes
263		Yes	Yes	Yes	No	No	No	Yes	No		Yes			No			Yes
264		Yes	Yes	Yes	No	No	No	No	No		No			No			Yes
265		Yes	Yes	Yes	Yes	Yes	No	Yes	Yes		No			No			No
266		Yes	Yes	Yes	No	No	No	Yes	No		No			No			Yes
267		Yes	Yes	Yes	No	No	No	Yes	Yes		No			No			No	Yes, I do see obstacles every day. We are inside a hospital network and barely able to use services of the university computer center.
268		Yes	Yes	Yes	No	No	No	No	No		Yes	The communication with the users would improve with a communication software.	management software.	No			Yes	No.
269		Yes	Yes	Yes	No	No	No	No	No		No			No			No	No
270		Yes	Yes	Yes	Yes	No	No	No	No		Yes	Greater faculty engagement with research facilities		No			Yes	Staff knowledge lacking and investment of time to develop.	implementation, time
271		Yes	Yes	No	No	No	No	No	No		No			No			Yes
272		Yes	Yes	Yes	No	No	Yes	No	Yes		No			Yes	One way communication (CF > user). Project tracking system (TraqBio). (other)		N/A
273		Yes	Yes	Yes	No	No	No	No	Yes		No			No			No
274		Yes	Yes	Yes	No	No	No	Yes	No		No			No			No
275		Yes	Yes	No	No	No	No	Yes	Yes		Yes	Communication can and should always be improved! The main issue to be always informed and up-to-date, in both directions (user <-> facility)		No			Yes
276		Yes	Yes	Yes	No	No	No	Yes	No		No			No			No
[truncated: 39 more columns]

## Sheet: 3
	Do you train your users about experimental techniques used in your facility?	Do you train your users about experimental techniques used in your facility?	If yes, what is the most important aspect of your training?	How important do you consider training?		Do you train your users about experimental techniques used in your facility?	all		full-service	hybrid-service	self-service		flow cytometry	genomics	histology	metabolomics	microscopy	mouse/rat	protein expression	proteomics		What is the most important aspect of your training?	all		full-service	hybrid-service	self-service		flow cytometry	genomics	histology	metabolomics	microscopy	mouse/rat	protein expression	proteomics			How important do you consider training?	all		full-service	hybrid-service	self-service		flow cytometry	genomics	histology	metabolomics
1	Yes			moderately important		yes	239		47	165	27		47	25	11	6	61	14	6	27		equipment, instruments	61		2	51	8		19	4	4	1	23	1	2	0			unimportant	2		1	1	0		0	0	0	0
2	Yes			moderately important		no	29		21	7	1		1	8	0	2	2	1	2	6		techniques, protocols	43		9	31	3		6	1	4	0	9	5	2	6			slightly important	10		9	1	0		1	1	0	1
3	Yes	For most of our instruments we train our users since we do not have the staff necessary to provide services on a large scale. Only a few (complicated) experiments are done on a service basis.	- How to use the instrument; also, so users do not cause damage (equipment) - How to set up an experiment, incl. what controls are needed (design) - Data analysis	very important			268															theory	42		17	22	3		8	6	1	0	10	3	1	7			moderately important	22		10	12	0		2	6	0	0
4	Yes			important																		data analysis + interpretation	36		8	26	2		5	2	2	4	5	0	1	8			important	57		23	32	2		7	15	1	2
5	Yes		Theoretical background and proper use of techniques.	very important																		sample preparation	25		7	13	5		4	0	2	3	8	0	0	7			very important	185		30	129	26		40	11	10	5
6	Yes		Data analysis	very important																		quality control, best practice	21		5	14	2		4	2	1	0	5	1	1	0				276
7	Yes	but rarely. Only for specific techniques for analysis of mouse preimplantation embryos.	Precision, motivation and patience	very important																		safety	19		0	16	3		2	1	1	0	9	0	2	0
8	Yes		Understanding each other	very important																		experimental design	16		5	10	1		3	3	0	1	1	2	0	1
9	Yes		specific training for each application, each microscope (equipment)	very important																		independence of the user	14		0	11	3		3	1	1	0	6	0	0	0
10	Yes		knowledge of the system (equipment)	very important																		software, data acquisition	13		1	6	6		5	0	1	1	3	0	0	2
11	Yes		instrument training (equipment)	very important																		limitations of technique	10		5	5	0		0	1	1	0	3	0	1	3
12	No	We don't have open-access instrumentation. Users need to have the general idea on how we proceed with the measurement but they don't need to know about the principle of instrument function. They simply need to understand the workflow (from sample preparation through data acquisition and to data processing and analysis).		moderately important																		controls	7		1	6	0		5	0	0	0	0	0	0	1
13	Yes		Ensuring they know when to ask questions.	very important																		rules to follow	4		0	3	1		1	0	0	0	1	1	0	0
14	Yes	We do limited training in specialised workshops/courses once per year	New and up and coming techniques in drug discovery and validation	slightly important																		troubleshooting	3		0	3	0		2	0	0	0	0	1	0	0
15	Yes		technical competence to use equipment	very important
16	Yes			very important
17	No			very important
18	Yes	No bio-informatic support, please note this is reflected in questions 2 and 3 at the beginning.	That the users understand why they are doing certain steps and how they work. (theoretical)	important
19	Yes		how to use our equipment	very important
20	Yes		Compliance with animal testing regulations and ethics	very important
21	Yes			important
22	No			important
23	Yes	Occasional PhD students in techniques e.g. Real-time PCR, NGS library prep.	Making the student confident in their ongoing work, using the instruments correctly (equipment)	very important
24	Yes		Sufficient amount of time has to be dedicated for training. Users should ideally be trained on their own data.	very important
25	Yes	hands on courses		important
26	Yes		Users should know the basic principles (theoretical) of the technique and learn how results look like, how to deal with them (analysis), which software packs are available for that and how to work with them.	very important
27	Yes		Consult about adapting standard sample prep protocols to specific needs, use of data analysis software	very important
28	No			slightly important
29	Yes	We have a different service for PhD vs other users. PhD are strongly encouraged to do the relationship is more teacher-student. The other interactions are more collaborative.	face time	important
30	No			very important
31	Yes		Training for other facilities	moderately important
32	Yes			important
33	Yes		how the instrument(s) actually operate (important for troubleshooting) (equipment)	important
34	Yes		Making sure they know what to do and how to do it, following the rules of the facility (technique)	very important
35	Yes	only a very selected number of power users (one person per year)	Experimental design, sample preparation and data analysis	moderately important
36	Yes	We do not have lab space for experiments. We only train for technology and use of instruments, not for sample preparation (unfortunately).	All users should get a basic understanding of the technology (theoretical). To make sure the user feels comfortable with the technology/the instrument (equipment). To make sure the user is able to use the QM procedures correctly and understands them and will notice, if the instrument is not in a state to measure sam-ples. We want to support the users in producing reproducible, good quality data.	very important
37	Yes	We currently train users ad hoc. We hope to setup a training program soon, to group trainees and consume time more efficiently.	Software-based analysis of proteomics data so users can perform their own statistical tests and generate their own figures.	important
38	Yes		To make sure that users become independent in using the techniques which we offer.	very important
39	Yes	Seminars, methods courses, training on projects	Project success: only successfully users are promoters	very important
40	Yes	only theoretical training	Make them understand the possibilities/limitations and the nature of the data generated (theoretical)	important
41	Yes		Enable them to use the microscopes such that they get good data, without damaging the hardware. (equipment)	very important
42	Yes		the users should be able to work with pluripotent stem cells by themselves (independence)	very important
43	No	Exceptionally some user (i.e. our customers) asked us for training. Nevertheless, this is not something we plan to generalize as by definition our business is to perform experiment for our customers/users.		unimportant
44	Yes		That users know their experiment and what they want to analyse and therefore choosing the right controls, colors and protocols. In the practical training I want that the user understands what he/she does and why, e.g. choosing the right voltages, understanding compensation. (theoretical, technique)	very important
45	Yes			important
46	Yes	We train on Western blotting, cell culture technique and safe use of liquid nitrogen as formal training sessions. We also train ad-hoc on a 1:1 basis when users require	To ensure best practice is taken away from any training, and an understanding on how to generate good quality research data, pros/cons on performing experiments certain ways (technique)	very important
47	Yes		to teach aseptic cell culture (techniques) and scientific practice including safety rules and most importantly insure quality control and characterization of the cell cultures and assays.	very important
48	Yes		Sample preparation Imaging (equipment) Data interpretation (analysis)	very important
49	Yes		Handling of samples processing (analysis)	very important
50	Yes		people should understand (theoretical)what they are doing, not just copy from established experiments from colleagues or CF staff	very important
51	Yes		independency	important
52	Yes			very important
53	Yes		Interest to learn :-)	very important
54	Yes		Training on equipment	very important
55	Yes	Mostly we give overviews, training for ordering our services or training on equipment/software we offer as bookable on PPMS	Most of the training we give is so that users can use the equipment/software themselves. There is a H&S aspect to this as well as a theoretical understanding and scientific quality aspect, which are all equally important but overall safety has to come first if pushed for the most important aspect in our core.	very important
56	Yes		Teaching handling instrument (equipment) and recording properly. Iaging Ethics, also unbiased recording (quality)	very important
57	Yes		getting best results, avoiding damage (equipment)	very important
58	Yes	No general training to all users but workshops offered that explain technique and laboratory-procedures	Explaining benefits and limitations of the tech-nique (theoretical)	moderately important
59	Yes		Good and correct sample preparation	important
60	Yes		learn how to use the machines (equipment) what flow cytometry is (theoretical)	very important
61	Yes		Sample preparation tech-nique prior to sample submission.	very important
62	Yes		Microscopy, Histology, Immunofluorescence and Sample Preparation	very important
63	Yes		Project related scientific and technical training to use complex instrumentation for data generation. (equipment) How to use the generated data properly. Raising awareness for correct, optimal sample preparation, limitations of the technique, alternatives as well as downstream analysis of the data (which may be outside the scope of the actual training).	very important
64	No			moderately important
65	Yes		How to use equipment correctly, store and evaluate data (analysis). Understand limits of applied method.	very important
66	Yes		highest Quality of processing tech-niques	important
67	Yes		Proficiency in data acquisition (software) and quality control	very important
68	Yes	Whoever is interested is welcome and I give seminars for interested scientists and inform regularly about new developments	to make clear that animals are no Eppendorf tubes, make people understand what the principle of the techniques (theoretical) is and how they have mate their founders and take care of them	very important
69	Yes			very important
70	Yes		Good transmission of knowledge	very important
71	Yes		That the users really understand the tech-nique and thus know what they are doing and why.(theoretical)	very important
72	Yes		applicability and functional possibilities	very important
73	Yes		That they understand the principles and the pitfalls. (theoretical, limitation)	very important
74	Yes		We are training students to be able to carry out CRISPR experiments (technique)	very important
75	Yes		minimise bad use of facility equipment	moderately important
76	NA			important
77	Yes		the training should lead the customers through the experiment so that he is able to perform the next experiment by it's own (technique)	very important
78	Yes			very important
79	Yes		data analysis	very important
80	Yes		how to use the analyzer, how to plan, execute and analyze properly (equipment, design, analysis)	very important
81	No			very important
82	Yes		Enable user to work independently	very important
83	Yes		-understanding method and technology's fundamental principles and basis of operation. (theoretical) -Understanding data quality and assignment principles	very important
84	Yes	using the microscopes or other devices	To provide the user with the best possible operation of the device (equipment) and to help him in the best possible way. The user should gain security and be able to work independently. To show the user that he can always ask questions.	important
85	Yes		Training on SOPs for the relevant techniques used in the study.	very important
86	Yes			very important
87	Yes		Safety, reliability (quality), teaching	very important
88	Yes		using the machines software	very important
89	Yes		To be trained to use the equipment in a proper way with regards to technical as well as scientific aspects.	very important
90	Yes		be sure that a user understand what he/she is doing with the instruments/ experiment (equipment)	very important
91	No			very important
92	Yes			very important
93	Yes		processing of Tissue, fixation, use of suitable antibodies (technique)	very important
94	Yes		safety, sample preparation, microscope handling (equipment)	very important
95	Yes	All users are required to undergo training before using our equipment themselves. This is not required for users for whom we perform a service ourselves.	The most important aspect is that the user learns to use the equipment correctly, on the one hand to perform the measurement reproducibly and scientifically correct (quality), and on the other hand so that the equipment is used without a risk of breaking it.	very important
96	Yes		The users must understand what we are doing to plan the experiments and interpret the data. (theoretical, analysis)	very important
97	Yes	training courses and hands-on workshops	support with data analysis, providing best-practises (quality), training	very important
98	Yes		Design of experiment and analysis	moderately important
99	Yes		safety for instruments and users, quality of results, throughput	very important
100	Yes	Handling the fish, injections and also using our microscopes	The injection training. We inject mostly Morpholinos, if the volume changes there you will get a high variance in your results. (technique)	very important
101	No	We would like to do this more but are missing resources.		important
102	Yes			important
103	Yes		hands on- to ensure machines work properly (equipment)	important
104	Yes	I train users in basic aseptic technique if required.	(technique)	very important
105	No	..as it is was never requested...		important
106	Yes			important
107	Yes		theorical and technical aspects (technique)	very important
108	Yes	1:1 training as well as short theory courses	understanding the user's specific need to perform the experiment well. Giving the user the information they need to use equipment save and well. Signing the user of an as independent user so we know that the equip-ment will not be damaged and the data produced is scientifically sound. (theoretical, quality)	very important
109	Yes		sample preparation and data analysis for biological interpretation	important
110	Yes		personalized	very important
111	No			moderately important
112	Yes		tailored training	very important
113	Yes		Knowledge about the technique and how to handle the instruments with care. (equipment) Moreover, they need to know what the research questions and using the right controls for their experiments.	very important
114	Yes		Making sure the users understand the technology (technique) and obey the rules of the platform	very important
115	Yes		knowledge/method transfer (theoretical) methodical education (technique) interpretation of results (analysis)	very important
116	Yes		Sample preparation, data analysis, statistics	very important
117	Yes		Practical sessions and protocol overview (technique)	very important
118	Yes		Discussion about the project's strategy (design) / general knowledge on what to expect from the state-of-the-art genomics & bioinformatics methodologies (theoretical)	important
119	Yes		Image understanding : notions as bit depth, dynamic, resolution are quite difficult to teach to biologists.(theoretical) Microscope use : try not to break lens. High end microscopy technics (FLIM, 2P, STED, PALM/STORM) are quite difficult to handle, we have to spend lot of time explaining details. (equipment) Concretely, if I feel the user I train is not capable, we (the facility) are in charge o…	very important
120	No	We explain the techniques and especially the output but we do not train them to do experiments themselves. They should become proficient in analysing the results, however. That is much more important.	(theoretical, analysis)	important
121	Yes		Operating the systems without damaging them. In second place would be the goal to get the most out of the individual experiments. (equipment, analysis)	very important
122	Yes	Training is performed for some techniques. For other (UCA, PEAQ-DSC automat), only engineers are in charge of the measurements	(technique)	very important
123	Yes		* Understanding both the operational aspects of an instrument and the underlying physical principles (equipment, theoretical) * Understanding how to set-up a sound experimental strategy (design) * Understanding how to analyse correctly the data (analysis)	very important
124	Yes	seminars about sample handling and techniques	proper handling of samples, read-out, (technique) analysis	very important
125	Yes			important
126	Yes	We dont train them how to perform experiments. We train them how to prepare the material (Cellstaining), how to acquire data and how to analyze these data in general. We expect training in experimental controls, answering biological research questions and biosafety from the PIs. (We just control the above topics).	- Fundamental knowledge including principles of math behind the technologies we teach (theoretical) - Maria Montessori concept: we teach them how to do it themselves. They should not get dependent on the scientists in the facility but become a scientist in a facility. The student I teach today, could become my employer tomorrow :-) (sample, software, analysis, independence)	very important
127	Yes		instrument usage (equipment) background information on imaging (theoretical)	very important
128	Yes		Continuing support and development of the trainee as they develop their expertise.	very important
129	Yes		Train to use equipment independently	very important
130	Yes		Ensuring that users are able to obtain correct and relevant data (technique)	very important
131	Yes		Clarity and knowledge of how to use the software	very important
132	Yes	I advise but know that many people ignore this advice.	Proper use of cytometers. (equipment)	very important
133	No			very important
134	Yes			very important
135	Yes		How to design the experiment so that the researchers measures what he/she actually intends to measure	very important
136	Yes		To help the users to be independently able to use the equipment and to understand optimal ways to prepare samples for their experiments. To make sure that the technicians and facility manager are up to date in their knowledge and expertise.	very important
137	Yes			very important
138	NA			important
139	Yes		well-trained users get good results and don't break things.	very important
140	Yes		attention to detail (quality) and safety	very important
141	Yes		Users need to understand what the Lab provides and how they can access training. Sample prep seems a common aspect in all cores	very important
142	Yes		comprehensive training from planning to data analysis hands on and theory (design, theoretical, technique)	very important
143	Yes		Safety relating to sam-ples, software instruction	very important
144	Yes		Mostly involves with training in the operation of the instrument (equipment) as well as data analysis	very important
145	Yes		Confidence that the users understand what they've been taught and take that knowledge away with them. My personal ethos about running a core facility is that as well as providing equipment/services, our main purpose is to provide knowledge and skills to our users. (theoretical, technique)	very important
146	Yes			important
147	Yes			very important
148	Yes		One to one training with sam-ples provided by the user to establish the best way to acquire the data. (equipment, software)	very important
149	Yes		Possibilities and Limitations of methods, background knowledge for students/postDocs (theoretical)	moderately important
150	Yes		Lab work and instrument safety.	very important
151	Yes			very important
152	Yes		Convincing people to provide the correct controls.	very important
153	Yes			important
154	Yes			important
155	Yes			important
156	Yes	No one uses anything until they've been assessed by us.	Safety	very important
157	Yes		Cytometer operation (equipment)	very important
158	Yes	We provide training for all three instruments, but allow independent use of only one. Training is also provided for data analysis	That users are able to operate FACS analysers (equipment) independently of core facility Training in the use of appropriate analysis soft-ware for flow cytometry generated data.	very important
159	Yes		aim of our training s is to make users independent on the instrument usage/ experimental setup	very important
160	Yes		accurate training by our staff giving SOP (written or in electronic form) (technique) to be always reachable even after termination of training in case users have further questions or troubleshooting	very important
161	Yes		Thorough training following SOP's (technique)	very important
162	No			important
163	Yes		Finding the best technique to answer the scientific question. (design)	very important
164	Yes		Enabling users to be set up their own experiments (independence)	very important
165	Yes	Yes, dependent on the expected future usage - i.e. if they will be regular users, we will put the time in to train them	Clarity and ensuring that users are only able to operate machines/perform data analysis when we are convinced that they are competent. (equipment)	important
166	Yes		Getting users to become knowledgeable and skilful enough to design, acquire (equipment) and analyse (analysis) their own experiments independently.	very important
167	Yes		Train user to look after the instruments (equipment)	very important
168	Yes			very important
169	Yes		Close interaction with the end-user to enhance their projects	important
170	Yes		Making sure they can use equipment safely (safety)	very important
171	Yes	If they want to be trained. Most elect not to do so. The main purpose of training is that it enables users to ask better questions rather than giving them independence	There is training for specific machine use which only a few users take up. (equipment) Much of our training is also quite ad hoc and generalised 'how to do a good experiment' training as not all students have such education in their home labs (theoretical, design)	moderately important
172	Yes		We are part of the university so we train master and Ph.D. students.	moderately important
173	Yes		1:1 and at the instruments (equipment)	very important
174	Yes		The correct use of the machine (equipment) and the correct execution of the project to achieve the best standards in flow cytometry.	very important
175	Yes		I can't single out any one aspect. There are a lot of details.	very important
176	Yes		Correct set up for the available hardware	very important
177	Yes		Teach people to use the instrument (equipment) without destroying it. And in a way that gives the information they need.	very important
178	Yes		Teaching researchers to technically use flow cytometers (equipment) and interpret the results. (analysis)	very important
179	No	Since users are not allowed to work within the CF, no need for training in this sense. However, sharing protocols and advising customers is of important to generate high quality data.		slightly important
180	Yes		1) Safety of users is the first thing in my training (laser and fluorescence light! ergonomics, toxic dyes etc.) 2) Proper use of equipment (proper cooling for lasers before switching off, immersion oil should not be excess, hitting the sam-ple with expensive oil objective etc.)	very important
181	No			slightly important
182	Yes	In case of the quantitative PCR (QPCR) or cell sorting we teach the users to operate those equipments. In addition, we also organize bioinformatic training using the Galaxy platform.	The goal is to train the users to operate the QPCR and the FACS machines. (equipment)	important
183	Yes	Presentations on meetings organized by our University Teaching credit courses for PhD students, who are the potential users		very important
184	Yes		Compensation (technique)	moderately important
185	No			slightly important
186	No			slightly important
187	Yes			important
188	Yes	Representatives from various companies come at site and demonstrate the newest techniques and equipment. Also, ThermoFisher Scientific Baltic company organizes "Science Day" on annual basis. They not only demonstrate their hot topics but also provide transportation to the scientific community members from various parts of the country. Also, the selected scientists (both achieved and PhD students)…	Being familiar with the newest technologies, ability to apply them in own research, exchanging ideas, making new contacts.	very important
189	Yes		Flawless preparation of samples (in our case crystals) for delivery to the CF	important
190	Yes		It gives users the capacity to do their own data analysis.	very important
191	Yes		we do provide sample preparation training to ensure sam-ples deliver results and are free of contamination	important
192	Yes		sample preparation	very important
193	Yes	There are two lines - training about usage of equipment (it is relevant only for users working in lab and for this case is mandatory) and training about principles of methods, design of study, data analysis, etc. - this is voluntary and based on some courses or workshops	For working in lab - safety (of measured participants, of technicians/researchers, of equipment = to avoid some damage) (equipment, theoretical, design, analysis)	important
194	No			important
195	Yes		Making sure the scientists we deal with have a dataset that we can go through with them. Then the training becomes more relevant and tailored to there questions. We previously did training courses that were general but often people didn't turn up and they struggled as some of it wasn't relevant to what they were doing. So now we do one on one training and it is much better but of course this is o…	slightly important
196	No	usually not (full service mode), only how to read results, in long-term cooperations training for using of instrumentation is possible for question below important is to learn users how to interpret and use our results		very important
197	Yes		good qua-lity of the sample, understanding the principles (theoretical), precision, safety	important
198	Yes		testing competency	very important
199	No			very important
200	Yes	Occasional (2/year) hands_on training	Improves users' background in genomic technologies. Helps them to perform "better" experiments. (theoretical)	important
201	Yes		To provide knowledge to the users in becoming independent later when using the particular technique.	very important
202	Yes		Quality standards and individualized workflows	very important
203	Yes			very important
204	Yes		Understanding the principle of FACS machines. (equipment)	very important
205	Yes			very important
206	Yes		discussing protocols (technique) and data analysis	moderately important
207	Yes			important
208	Yes	if requested, but not in a way that they are able to perform their experiments on their own	give the users the background (theoretical) to understand how to proceed with the animals generated in our facility and in addition the caretakers are trained	important
209	Yes		Training is only provide on a theoretical basis, so that the users can understand the potential and also limitations of the techniques we use. According to our experience, "user prepared samples" are often insufficient in qua-lity All sam-ple prep and instrumental analy-sis is performed by expert technical staff and scientific core facility personnel. We also provide detailed guidance how to eval…	very important
210	Yes		Scientific project related technical sound training to achieve best scientific results (technique) as basic as possible regarding the hardware	very important
211	Yes		Adherence to protocols (technique)	very important
212	Yes		One to one and time	very important
213	Yes		Compensation	moderately important
214	Yes		Making sure they understand how to set up an experiment and troubleshoot issues (design)	very important
215	NA			important
216	Yes	We offer EDMs (experimental design meetings) once a week, they are bookable via a dedicated email and the user fills in information on a template document. The meeting has representation from both our genomics and bioinformatics cores.	ensuring the user is aware of multiple, often new, tech-niques (theoretical). Understanding batch effects and good design of randomisation, including biological and technical replicates. (quality)	very important
217	Yes		make the people aware about the limitations	very important
218	Yes		knowledge transfer (theoretical), safety	very important
219	Yes			important
220	No			very important
221	Yes		applicative tests and optimization for the user's purpose	very important
222	Yes		Make sure the user follows the guidelines of the facility. (rules)	very important
223	Yes		know-hows : stem cell culture is very difficult (technique)	important
224	Yes	After training, users are allowed to work independently at the laser micro dissection system.	Making correct use of the laser microdissection setup and avoid damage of the setup by misuse. (equipment)	very important
225	NA			important
226	No	Seminar, Students can work here		important
227	Yes		health and safety/lab skills	very important
228	Yes			very important
229	Yes		How to get reliable data (software)	very important
230	Yes			very important
231	Yes	4 hours basic facility use training and use of analysers - too short and packed with information, whish I could have them a whole day. 3 hours of self-operated self-calibrating cell sorters. Unlimited amount of individual support until a user is comfortable using each piece of equipment.	laboratory safety and proper waste disposal (there is a separate MLI and MLII cytometry lab), basic use of user interfaces (software) and how to get consistent results, instrument set up, (equipment) using proper experimental controls, QC. (quality)	very important
232	No			slightly important
233	Yes		Safety first - no harm to instrument, sam-ple or user	important
234	Yes			very important
235	Yes	Lectures, courses - I usually show lots of data from our own facility.	Make people (u-sers, mostly molecular biologists and biochemists) aware of the possibilities of this state-of-the-art technology (i.e. proteomics). (theoretical)	very important
236	Yes	We provide a course every year	Hands on experience (technique)	moderately important
237	Yes		sample preparation and selections, including controls	important
238	Yes		Sample specific training. We really try to adapt the training to the user	very important
239	Yes		The basics of the methods and how the devices work (theoretical, equipment)	very important
240	No			moderately important
241	Yes		Hands on training.	important
242	Yes	in the mandatory face-to-face discussion before a project is accepted we discuss the scope and possible outcome of each technique. We decide together how to process and analyze the samples. In many cases the users have to help during sample preparation.	clean sample preparation	important
243	No			moderately important
244	Yes	Yes, every user gets trained to the level that he/she understands the final output data (excel table) and knows how to correctly interpret the data. Extensive users often also get deeper trainings, i.e. training in how the data was acquired, how LC-MS/MS works, how the data got analyzed to reach the point of the excel table....	Making sure that the users know how to correctly interpret the data that we provide, i.e. which scientific conclusions are supported by the data and which NOT. (analysis)	very important
245	Yes	We usually integrate and exchange our competences	Welfare and animal care	important
246	Yes		attention to detail (quality)	very important
247	Yes		Handle the devices properly and to know, how to interpret the generated data. (equipment, analysis)	very important
248	Yes			very important
249	Yes			slightly important
250	Yes			important
251	Yes		Microscopy Fundamental concepts and understanding the technique (theoretical)	very important
252	Yes		collect data that you can quantify (pre-)define the process or feature that you want to quantify! (software)	very important
253	Yes			very important
254	Yes		Teaching good practice for cell culture (technique)	important
255	Yes	The people who would benefit most from the training tend not to attend.	Good experimental design to maximise successful outcome.	very important
256	Yes		To organize theoretical courses of flow cytometry and then training courses on instruments. (equipment) After this, to select users able to correctly follow the procedures of setup and maintenance.	very important
257	Yes		keep instrument in a clean and functional state use right instrument settings (equipment) use good controls	very important
258	Yes		Sample preparation	very important
259	Yes		Understand and interpret the QC at each experimental step (quality)	very important
260	Yes		- how do my samples have to be prepared BEFORE coming - what is possible/ where are the limitations - which results may I get (technique) - how to operate the instruments (equipment) - how to interpret the results (analysis) - which problems of over interpreting might occur	very important
261	NA	only rarely in form of students courses		moderately important
262	Yes		Basic understanding what a technique can do and a technique can't do. (theoretical, limitation)	very important
263	Yes		Quality assurance	very important
264	Yes			slightly important
265	Yes		People should really understand what they do. (theoretical)	very important
266	NA			important
267	Yes		Safety of subjects and staff members.	very important
268	No			moderately important
269	NA	Not applicable. Usually, we provide training if a user specifically asks for. We do not do it on a regular basis.		unimportant
270	Yes		Safe use of equipment (safety)	important
271	No	Most of time no, but if there are users that heavily use MS-proteomics, then yes, we do train them to do sample preparation for MS analysis. For the data analysis we give users the option to be trained or not with the data analysis software,		moderately important
272	Yes		Introducing handling of sequencing/preparation devices. (theoretical)	very important
273	NA	it depends		very important
274	Yes		To convey the importance of compliance with trained study designs, protocols and procedures.(technique)	very important
275	Yes		Verifying that the users possess sufficient skills in handling the animals and understanding the protocols for their experiment, also emphasizing the work culture and good practice in all situations, especially in case of uncertainties - where and when to seek for help (theoretical, technique, quality)	very important
276	Yes		that it is individual for the questions the user wants to answer by doing microscopy	very important
[truncated: 4 more columns]

## Sheet: 4
	Are you involved in experimental design?	If no, why are you not involved?	Would it be important for you to be involved?	How do you provide it?	face to face discussion	phone	in writing (file or paper)	email	other	How do you get involved?	face to face discussion	phone	in writing (file or paper)	email	other		Are you involved in experimental design?	all		full-service	hybrid-service	self-service		flow cytometry	genomics	histology	metabolomics	microscopy	mouse/rat	protein expression	proteomics		How do you provide it? How do you get involved? (pooled)	all		full-service	hybrid-service	self-service		flow cytometry	genomics	histology	metabolomics	microscopy	mouse/rat	protein expression	proteomics
1	Yes, we are actively involved		N/A							project discussion with user	Yes						No	4		1	2	1		0	0	0	0	1	0	0	0		in person	243		67	158	18		46	30	10	7	59	11	7	32
2	Yes, we provide information		N/A														Yes, we provide information	108		22	66	20		28	13	8	4	31	2	0	7		email	171		48	115	8		34	24	5	7	37	9	7	20
3	Yes, we provide information		N/A	In personal meetings. This is not necessarily done for all experiments.	Yes												Yes, we are actively involved	164		50	107	7		22	20	3	4	31	14	8	28		in writing	118		39	76	3		20	17	6	3	24	9	5	15
4	Yes, we are actively involved		N/A							We usually do the planning ourselves (full-service).								276															phone	96		31	65	0		12	19	3	3	19	6	6	9
5	Yes, we provide information		N/A	Via sound waves.	Yes																												other	8		2	4	2		0	0	0	0	4	1	1	1
6	Yes, we are actively involved		N/A							If possible we meet the users before they start doing any experiment.	Yes
7	Yes, we provide information		N/A
8	Yes, we are actively involved		N/A							We don't do projects without being involved
9	Yes, we provide information		N/A	1 to 1 talks	Yes
10	Yes, we provide information		N/A	initial discussion before and during trainings	Yes
11	Yes, we provide information		N/A	discussion, protocols on our website	Yes		Yes
12	Yes, we are actively involved		N/A							Through the discussion with our users, in person.	Yes
13	Yes, we provide information		N/A	We vary our approach depending on the user's requirements. Some choose to make the most of our expertise but others prefer to choose other routes. We cannot force researchers to listen.
14	Yes, we are actively involved		N/A							We provide expertise in design of assays before they are transferred to us. We then do the whole work independently and report the outcome to the users.
15	Yes, we are actively involved		N/A							verbal and written guidance, SOP's	Yes		Yes
16	Yes, we provide information		N/A														Yes	272
17	No	Experimental design is group leaders responsibility	No														No	4
18	Yes, we provide information		N/A	meeting face to face and discussion about aims of the users project	Yes
19	Yes, we provide information		N/A	training					training
20	Yes, we are actively involved		N/A							From the genesis of the project to its finality
21	Yes, we are actively involved		N/A							Construct design, background of mice, technology
22	Yes, we are actively involved		N/A							By project management, start project, experimental design, report, invoicing.
23	Yes, we provide information		N/A	Face to face discussion and email	Yes			Yes
24	Yes, we provide information		N/A	We would like to be involved. Unfortunately in 95% of cases data will be produced without our consultation.
25	Yes, we provide information		N/A	meetings	Yes
26	Yes, we are actively involved		N/A							User tell what they want to analyze and what they expect from the core facility. We tell, how we would analyze the samples and what are preferred methods to do the experiments to end up with samples compatible with the methods of the core facility.	Yes
27	Yes, we provide information		N/A	I very much like it when users ask about advice on experimental design. Usually in a face2face meeting or by email. Not all users chose to do so.	Yes			Yes
28	Yes, we provide information		N/A	Personal project discussions	Yes
29	Yes, we are actively involved		N/A							In some cases we design the entire experiment (about 20%) In other cases it's more of a collaborative relationship (about 55%) In others it's more of a pure service role (approx 25%)
30	Yes, we provide information		N/A	Email				Yes
31	Yes, we are actively involved		N/A							Mail, Phone		Yes		Yes
32	Yes, we are actively involved		N/A
33	Yes, we are actively involved		N/A							if the users allow us to, we give recommendations on their experimental controls and panel design (suggest to shift fluorophores for example);
34	Yes, we are actively involved		N/A							Advise on what tests to use and animal numbers
35	Yes, we are actively involved		N/A							Project lacking appropriate experimental design are not conducted.
36	Yes, we are actively involved		N/A							We have a project meeting for every user and we get involved if a user has a special application and needs advice. This is mainly for mass cytometry and imaging mass cytometry.	Yes
37	Yes, we are actively involved		N/A							Most researchers have no idea how to setup their experiment, often because they are lacking the expert knowledge about our technology (proteomics). Hence, they cannot judge what to expect, how many replicates should be included, if multiplexing is appropriate, etc... Experimental design is almost exclusively our task, of course in close consultation with the user.
38	Yes, we are actively involved		N/A							As already described, we provide new users with the the link to our new user project questions, we discuss the project with user then individual on one to one basis and based on the user project questions and one to one meeting with user we make a plan about which instruments will be used to acquire data - and we also talk about how the experiment should be design so it meets the needs of the use…	Yes
39	Yes, we are actively involved		N/A							Mandatory up-front project discussions for all new projects	Yes
40	Yes, we are actively involved		N/A							In depth discussions, ideally before experiments start.	Yes
41	Yes, we provide information		N/A	we talk to people	Yes
42	Yes, we are actively involved		N/A							meetings, discussion, project supervision, collaboration	Yes
43	Yes, we are actively involved		N/A							We prepare the study plans and they are approved by us and by our customers/users.
44	Yes, we are actively involved		N/A							We are not involved in all user experiments but if our help is needed, we provide cell isolation protocols, staining protocols, support with panel design			Yes
45	Yes, we are actively involved		N/A							Previous meetings, goals clarification, research question statement	Yes
46	Yes, we provide information		N/A	1:1 sessions and workshops	Yes
47	Yes, we are actively involved		N/A							people ask for help by mail or get send to us by their supervisor	Yes			Yes
48	Yes, we are actively involved		N/A							We propose the experimental solutions, check the literature if necessary
49	Yes, we provide information		N/A	in meetings, in writing	Yes		Yes
50	Yes, we provide information		N/A	user meetings are mandatory before using the facility - we then discuss the experiment and give the minimum requirements for controls, setup, staining techniques etc	Yes
51	Yes, we are actively involved		N/A
52	Yes, we are actively involved		N/A
53	Yes, we are actively involved		N/A							By meeting scientists when they plan their experiments, and being actively involved if experimental licences are needed (eg. animal welfare)	Yes
54	Yes, we provide information		N/A	During discussion	Yes
55	Yes, we provide information		N/A	This very much depends on the user and the project. e.g. for Tissue Microarray building we are heavily involved in the design of the TMAs but for the most part in terms of the larger project we are not involved so actively. Users tend to come to us for advice but only on specific histology technical/logistical aspects.
56	Yes, we are actively involved		N/A							Every new users gets a personal meeting with us discussing the project and what we consider the right instrument and experimental design also some information about the proper statistics. If quantification is needed or wanted its a longer process. Also we do sometimes pilot experiments with the users.	Yes
57	Yes, we provide information		N/A	meetings	Yes
58	Yes, we provide information		N/A	General warnings on website to consult with us early Personal discussions: refer to experts for design and analyses, describe best practices and problems of samples. Suggest controls and protocols for specific methods.	Yes
59	Yes, we are actively involved		N/A							we advise new users regarding the optimal dyes for the FACS instrument in question and the sample preparation If we already have experience or protocols, users can fall back on these
60	Yes, we are actively involved		N/A							meetings with the researchers	Yes
61	Yes, we provide information		N/A		Yes	No	Yes	Yes			N/A	N/A	N/A	N/A
62	Yes, we are actively involved		N/A		N/A	N/A	N/A	N/A			Yes	No	No	Yes
63	Yes, we provide information		N/A		Yes	No	No	No			N/A	N/A	N/A	N/A
64	Yes, we provide information		N/A		Yes	Yes	Yes	Yes			N/A	N/A	N/A	N/A
65	Yes, we are actively involved		N/A		N/A	N/A	N/A	N/A			Yes	Yes	No	Yes	As we offer full service we are not just involved but actively design experiments.
66	Yes, we provide information		N/A		Yes	Yes	Yes	Yes			N/A	N/A	N/A	N/A
67	Yes, we are actively involved		N/A		N/A	N/A	N/A	N/A			Yes	Yes	Yes	Yes
68	Yes, we are actively involved		N/A		N/A	N/A	N/A	N/A			Yes	Yes	No	Yes
69	Yes, we provide information		N/A		Yes	No	No	No			N/A	N/A	N/A	N/A
70	Yes, we are actively involved		N/A		N/A	N/A	N/A	N/A			Yes	Yes	Yes	Yes
71	Yes, we are actively involved		N/A		N/A	N/A	N/A	N/A			Yes	Yes	No	Yes
72	Yes, we provide information		N/A		Yes	No	No	No			N/A	N/A	N/A	N/A
73	Yes, we are actively involved		N/A		N/A	N/A	N/A	N/A			Yes	Yes	Yes	Yes
74	Yes, we are actively involved		N/A		N/A	N/A	N/A	N/A			Yes	No	No	Yes
75	Yes, we provide information		N/A		Yes	Yes	Yes	Yes			N/A	N/A	N/A	N/A
76	Yes, we are actively involved		N/A		N/A	N/A	N/A	N/A			Yes	Yes	Yes	Yes
77	Yes, we are actively involved		N/A		N/A	N/A	N/A	N/A			Yes	No	No	Yes
78	Yes, we provide information		N/A		Yes	Yes	No	Yes			N/A	N/A	N/A	N/A
79	Yes, we are actively involved		N/A		N/A	N/A	N/A	N/A			Yes	Yes	No	Yes
80	Yes, we are actively involved		N/A		N/A	N/A	N/A	N/A			Yes	Yes	Yes	Yes
81	Yes, we are actively involved		N/A		N/A	N/A	N/A	N/A			Yes	No	No	Yes
82	Yes, we provide information		N/A		Yes	Yes	Yes	Yes			N/A	N/A	N/A	N/A
83	Yes, we are actively involved		N/A		N/A	N/A	N/A	N/A			Yes	Yes	Yes	Yes
84	Yes, we are actively involved		N/A		N/A	N/A	N/A	N/A			Yes	Yes	Yes	Yes
85	Yes, we are actively involved		N/A		N/A	N/A	N/A	N/A			Yes	Yes	Yes	Yes	google docs
86	Yes, we provide information		N/A		Yes	No	No	No			N/A	N/A	N/A	N/A
87	Yes, we are actively involved		N/A		N/A	N/A	N/A	N/A			Yes	Yes	Yes	Yes
88	Yes, we provide information		N/A		Yes	No	No	No			N/A	N/A	N/A	N/A
89	Yes, we provide information		N/A		Yes	Yes	Yes	Yes			N/A	N/A	N/A	N/A
90	Yes, we provide information		N/A		Yes	No	No	Yes			N/A	N/A	N/A	N/A
91	Yes, we are actively involved		N/A		N/A	N/A	N/A	N/A			Yes	Yes	Yes	Yes
92	Yes, we are actively involved		N/A		N/A	N/A	N/A	N/A			Yes	No	Yes	Yes
93	Yes, we provide information		N/A		Yes	Yes	No	No			N/A	N/A	N/A	N/A
94	Yes, we are actively involved		N/A		N/A	N/A	N/A	N/A			Yes	No	No	Yes
95	Yes, we are actively involved		N/A		N/A	N/A	N/A	N/A			Yes	Yes	Yes	Yes
96	Yes, we provide information		N/A		Yes	No	Yes	No	skype		N/A	N/A	N/A	N/A
97	Yes, we provide information		N/A		Yes	No	No	No			N/A	N/A	N/A	N/A
98	Yes, we are actively involved		N/A		N/A	N/A	N/A	N/A			Yes	Yes	Yes	Yes
99	No	experimental design of what? Samples? Instruments? procedures? its a too generic question	Yes		N/A	N/A	N/A	N/A			N/A	N/A	N/A	N/A
100	Yes, we are actively involved		N/A		N/A	N/A	N/A	N/A			Yes	Yes	No	Yes
101	Yes, we are actively involved		N/A		N/A	N/A	N/A	N/A			Yes	Yes	Yes	Yes
102	Yes, we are actively involved		N/A		N/A	N/A	N/A	N/A			Yes	Yes	Yes	Yes
103	Yes, we are actively involved		N/A		N/A	N/A	N/A	N/A			Yes	No	Yes	No
104	No	Principle investigators guide experimental design when setting up cell culture experiments	No		N/A	N/A	N/A	N/A			N/A	N/A	N/A	N/A
105	Yes, we are actively involved		N/A		N/A	N/A	N/A	N/A			Yes	No	No	No
106	Yes, we are actively involved		N/A		N/A	N/A	N/A	N/A			Yes	No	Yes	Yes
107	Yes, we are actively involved		N/A		N/A	N/A	N/A	N/A			Yes	Yes	Yes	Yes
108	Yes, we are actively involved		N/A		N/A	N/A	N/A	N/A			Yes	No	Yes	Yes
109	Yes, we are actively involved		N/A		N/A	N/A	N/A	N/A			Yes	No	Yes	Yes
110	Yes, we are actively involved		N/A		N/A	N/A	N/A	N/A			Yes	Yes	Yes	Yes
111	Yes, we provide information		N/A		Yes	Yes	No	Yes			N/A	N/A	N/A	N/A
112	Yes, we are actively involved		N/A		N/A	N/A	N/A	N/A			Yes	No	No	No
113	Yes, we provide information		N/A		Yes	Yes	No	Yes			N/A	N/A	N/A	N/A
114	Yes, we provide information		N/A		Yes	No	No	Yes			N/A	N/A	N/A	N/A
115	Yes, we provide information		N/A		Yes	No	No	No			N/A	N/A	N/A	N/A
116	Yes, we are actively involved		N/A		N/A	N/A	N/A	N/A			Yes	Yes	No	Yes
117	Yes, we provide information		N/A		Yes	No	No	No			N/A	N/A	N/A	N/A
118	Yes, we are actively involved		N/A		N/A	N/A	N/A	N/A			Yes	No	No	Yes
119	Yes, we provide information		N/A		Yes	Yes	No	Yes			N/A	N/A	N/A	N/A
120	Yes, we are actively involved		N/A		N/A	N/A	N/A	N/A			Yes	No	No	Yes
121	Yes, we are actively involved		N/A		N/A	N/A	N/A	N/A			Yes	Yes	No	Yes
122	Yes, we are actively involved		N/A		N/A	N/A	N/A	N/A			Yes	No	Yes	No
123	Yes, we are actively involved		N/A		N/A	N/A	N/A	N/A			Yes	No	Yes	Yes
124	Yes, we provide information		N/A		Yes	Yes	Yes	Yes			N/A	N/A	N/A	N/A
125	Yes, we are actively involved		N/A		N/A	N/A	N/A	N/A			Yes	Yes	Yes	No
126	Yes, we provide information		N/A		Yes	No	Yes	Yes			N/A	N/A	N/A	N/A
127	Yes, we provide information		N/A		Yes	Yes	Yes	Yes			N/A	N/A	N/A	N/A
128	Yes, we are actively involved		N/A		N/A	N/A	N/A	N/A			Yes	No	Yes	Yes
129	Yes, we are actively involved		N/A		N/A	N/A	N/A	N/A			Yes	No	No	Yes	in the lab
130	Yes, we are actively involved		N/A		N/A	N/A	N/A	N/A			Yes	No	No	Yes
131	Yes, we provide information		N/A		Yes	No	No	No			N/A	N/A	N/A	N/A
132	Yes, we provide information		N/A		Yes	No	Yes	Yes			N/A	N/A	N/A	N/A
133	Yes, we are actively involved		N/A		N/A	N/A	N/A	N/A			Yes	No	Yes	No
134	Yes, we are actively involved		N/A		N/A	N/A	N/A	N/A			Yes	No	No	No
135	Yes, we are actively involved		N/A		N/A	N/A	N/A	N/A			Yes	No	Yes	Yes
136	Yes, we provide information		N/A		Yes	Yes	No	Yes			N/A	N/A	N/A	N/A
137	Yes, we provide information		N/A		Yes	No	No	Yes			N/A	N/A	N/A	N/A
138	Yes, we provide information		N/A		Yes	No	Yes	No			N/A	N/A	N/A	N/A
139	Yes, we provide information		N/A		Yes	No	Yes	Yes			N/A	N/A	N/A	N/A
140	Yes, we are actively involved		N/A		N/A	N/A	N/A	N/A			Yes	No	No	Yes
141	Yes, we are actively involved		N/A		N/A	N/A	N/A	N/A			Yes	No	Yes	Yes
142	Yes, we are actively involved		N/A		N/A	N/A	N/A	N/A			Yes	Yes	Yes	Yes
143	Yes, we provide information		N/A		Yes	No	No	Yes			N/A	N/A	N/A	N/A
144	Yes, we provide information		N/A		Yes	No	Yes	Yes			N/A	N/A	N/A	N/A
145	Yes, we are actively involved		N/A		N/A	N/A	N/A	N/A			Yes	Yes	No	Yes
146	Yes, we provide information		N/A		Yes	No	No	No			N/A	N/A	N/A	N/A
147	Yes, we provide information		N/A		Yes	No	No	Yes			N/A	N/A	N/A	N/A
148	Yes, we provide information		N/A		Yes	No	No	No			N/A	N/A	N/A	N/A
149	Yes, we are actively involved		N/A		N/A	N/A	N/A	N/A			Yes	No	No	No
150	Yes, we provide information		N/A		Yes	No	No	No			N/A	N/A	N/A	N/A
151	Yes, we are actively involved		N/A		N/A	N/A	N/A	N/A			Yes	No	Yes	Yes
152	Yes, we provide information		N/A		Yes	No	No	Yes			N/A	N/A	N/A	N/A
153	Yes, we are actively involved		N/A		N/A	N/A	N/A	N/A			Yes	Yes	Yes	Yes
154	Yes, we provide information		N/A		Yes	Yes	No	No			N/A	N/A	N/A	N/A
155	Yes, we provide information		N/A		Yes	No	No	No			N/A	N/A	N/A	N/A
156	Yes, we are actively involved		N/A		N/A	N/A	N/A	N/A			Yes	Yes	No	Yes
157	Yes, we provide information		N/A		Yes	No	Yes	Yes			N/A	N/A	N/A	N/A
158	Yes, we are actively involved		N/A		N/A	N/A	N/A	N/A			Yes	No	No	No
159	Yes, we are actively involved		N/A		N/A	N/A	N/A	N/A			Yes	Yes	Yes	Yes
160	Yes, we are actively involved		N/A		N/A	N/A	N/A	N/A			Yes	Yes	Yes	Yes
161	Yes, we provide information		N/A		Yes	No	No	Yes			N/A	N/A	N/A	N/A
162	Yes, we provide information		N/A		Yes	Yes	Yes	Yes			N/A	N/A	N/A	N/A
163	Yes, we provide information		N/A		Yes	No	Yes	Yes			N/A	N/A	N/A	N/A
164	Yes, we are actively involved		N/A		N/A	N/A	N/A	N/A			Yes	Yes	Yes	Yes
165	Yes, we are actively involved		N/A		N/A	N/A	N/A	N/A			Yes	Yes	No	Yes
166	Yes, we are actively involved		N/A		N/A	N/A	N/A	N/A			Yes	No	No	Yes
167	Yes, we provide information		N/A		Yes	No	No	Yes			N/A	N/A	N/A	N/A
168	Yes, we are actively involved		N/A		N/A	N/A	N/A	N/A			Yes	No	No	No
169	Yes, we are actively involved		N/A		N/A	N/A	N/A	N/A			Yes	No	Yes	Yes
170	Yes, we provide information		N/A		Yes	No	No	Yes			N/A	N/A	N/A	N/A
171	Yes, we are actively involved		N/A		N/A	N/A	N/A	N/A			Yes	Yes	Yes	Yes
172	Yes, we are actively involved		N/A		N/A	N/A	N/A	N/A			Yes	No	Yes	Yes
173	Yes, we provide information		N/A		Yes	No	Yes	Yes			N/A	N/A	N/A	N/A
174	Yes, we are actively involved		N/A		N/A	N/A	N/A	N/A			Yes	No	No	Yes
175	Yes, we are actively involved		N/A		N/A	N/A	N/A	N/A			Yes	Yes	No	Yes
176	Yes, we provide information		N/A		Yes	Yes	Yes	Yes			N/A	N/A	N/A	N/A
177	Yes, we provide information		N/A		Yes	Yes	No	Yes			N/A	N/A	N/A	N/A
178	Yes, we are actively involved		N/A		N/A	N/A	N/A	N/A			Yes	Yes	Yes	Yes
179	Yes, we are actively involved		N/A		N/A	N/A	N/A	N/A			Yes	Yes	Yes	Yes
180	Yes, we are actively involved		N/A		N/A	N/A	N/A	N/A			Yes	No	No	No	We don't involve in all experimental designs of users, only when they need help.
181	Yes, we are actively involved		N/A		N/A	N/A	N/A	N/A			Yes	No	Yes	Yes
182	Yes, we provide information		N/A		Yes	Yes	No	Yes			N/A	N/A	N/A	N/A
183	Yes, we are actively involved		N/A		N/A	N/A	N/A	N/A			Yes	No	No	No
184	Yes, we are actively involved		N/A		N/A	N/A	N/A	N/A			Yes	No	No	Yes
185	Yes, we are actively involved		N/A		N/A	N/A	N/A	N/A			Yes	Yes	Yes	Yes
186	Yes, we provide information		N/A		Yes	Yes	No	Yes			N/A	N/A	N/A	N/A
187	Yes, we are actively involved		N/A		N/A	N/A	N/A	N/A			Yes	Yes	Yes	Yes
188	Yes, we provide information		N/A		Yes	No	Yes	No			N/A	N/A	N/A	N/A
189	No	We use standard instrumentation (for single crystal X-ray diffraction), its modification is not necessary	No		N/A	N/A	N/A	N/A			N/A	N/A	N/A	N/A
190	Yes, we provide information		N/A		Yes	No	No	No			N/A	N/A	N/A	N/A
191	Yes, we are actively involved		N/A		N/A	N/A	N/A	N/A			Yes	No	Yes	Yes
192	Yes, we are actively involved		N/A		N/A	N/A	N/A	N/A			Yes	No	No	No
193	Yes, we are actively involved		N/A		N/A	N/A	N/A	N/A			Yes	No	No	No
194	Yes, we provide information		N/A		Yes	No	No	No			N/A	N/A	N/A	N/A
195	Yes, we provide information		N/A		Yes	No	No	Yes			N/A	N/A	N/A	N/A
196	Yes, we provide information		N/A		Yes	No	No	Yes			N/A	N/A	N/A	N/A
197	Yes, we are actively involved		N/A		N/A	N/A	N/A	N/A			Yes	Yes	Yes	Yes
198	Yes, we are actively involved		N/A		N/A	N/A	N/A	N/A			Yes	No	Yes	Yes
199	Yes, we are actively involved		N/A		N/A	N/A	N/A	N/A			Yes	No	No	Yes
200	Yes, we provide information		N/A		Yes	Yes	Yes	Yes			N/A	N/A	N/A	N/A
201	Yes, we are actively involved		N/A		N/A	N/A	N/A	N/A			Yes	Yes	Yes	Yes
202	Yes, we are actively involved		N/A		N/A	N/A	N/A	N/A			Yes	Yes	Yes	Yes
203	Yes, we provide information		N/A		Yes	No	No	Yes			N/A	N/A	N/A	N/A
204	Yes, we provide information		N/A		Yes	No	Yes	Yes			N/A	N/A	N/A	N/A
205	Yes, we are actively involved		N/A		N/A	N/A	N/A	N/A			Yes	No	Yes	No
206	Yes, we are actively involved		N/A		N/A	N/A	N/A	N/A			Yes	No	No	Yes
207	Yes, we are actively involved		N/A		N/A	N/A	N/A	N/A			Yes	No	Yes	Yes
208	Yes, we are actively involved		N/A		N/A	N/A	N/A	N/A			Yes	No	Yes	Yes
209	Yes, we are actively involved		N/A		N/A	N/A	N/A	N/A			Yes	Yes	Yes	Yes
210	Yes, we are actively involved		N/A		N/A	N/A	N/A	N/A			Yes	No	Yes	Yes
211	Yes, we are actively involved		N/A		N/A	N/A	N/A	N/A			Yes	Yes	No	Yes
212	Yes, we provide information		N/A		Yes	No	Yes	Yes			N/A	N/A	N/A	N/A
213	Yes, we are actively involved		N/A		N/A	N/A	N/A	N/A			Yes	No	Yes	Yes
214	Yes, we provide information		N/A		Yes	No	Yes	Yes			N/A	N/A	N/A	N/A
215	Yes, we are actively involved		N/A		N/A	N/A	N/A	N/A			Yes	Yes	Yes	Yes
216	Yes, we are actively involved		N/A		N/A	N/A	N/A	N/A			Yes	No	No	No
217	Yes, we provide information		N/A		Yes	No	No	Yes			N/A	N/A	N/A	N/A
218	Yes, we provide information		N/A		Yes	Yes	Yes	Yes			N/A	N/A	N/A	N/A
219	Yes, we are actively involved		N/A		N/A	N/A	N/A	N/A			Yes	Yes	Yes	Yes
220	Yes, we are actively involved		N/A		N/A	N/A	N/A	N/A			Yes	No	No	No
221	Yes, we provide information		N/A		Yes	No	No	No			N/A	N/A	N/A	N/A
222	Yes, we are actively involved		N/A		N/A	N/A	N/A	N/A			Yes	No	No	Yes
223	Yes, we are actively involved		N/A		N/A	N/A	N/A	N/A			Yes	Yes	Yes	Yes
224	Yes, we are actively involved		N/A		N/A	N/A	N/A	N/A			Yes	Yes	No	Yes
225	Yes, we are actively involved		N/A		N/A	N/A	N/A	N/A			Yes	Yes	Yes	Yes
226	Yes, we are actively involved		N/A		N/A	N/A	N/A	N/A			Yes	Yes	Yes	Yes
227	Yes, we are actively involved		N/A		N/A	N/A	N/A	N/A			Yes	Yes	Yes	Yes
228	Yes, we provide information		N/A		Yes	Yes	No	Yes			N/A	N/A	N/A	N/A
229	Yes, we are actively involved		N/A		N/A	N/A	N/A	N/A			Yes	No	No	Yes
230	Yes, we are actively involved		N/A		N/A	N/A	N/A	N/A			Yes	No	No	Yes
231	Yes, we are actively involved		N/A		N/A	N/A	N/A	N/A			Yes	No	No	Yes
232	Yes, we provide information		N/A		Yes	No	Yes	Yes			N/A	N/A	N/A	N/A
233	Yes, we provide information		N/A		Yes	No	No	Yes			N/A	N/A	N/A	N/A
234	Yes, we are actively involved		N/A		N/A	N/A	N/A	N/A			Yes	No	Yes	No
235	Yes, we are actively involved		N/A		N/A	N/A	N/A	N/A			Yes	No	Yes	Yes
236	Yes, we are actively involved		N/A		N/A	N/A	N/A	N/A			Yes	Yes	No	Yes
237	Yes, we provide information		N/A		No	No	Yes	Yes			N/A	N/A	N/A	N/A
238	Yes, we are actively involved		N/A		N/A	N/A	N/A	N/A			Yes	Yes	Yes	Yes
239	Yes, we are actively involved		N/A		N/A	N/A	N/A	N/A			Yes	Yes	Yes	Yes
240	Yes, we are actively involved		N/A		N/A	N/A	N/A	N/A			Yes	No	Yes	Yes
241	Yes, we are actively involved		N/A		N/A	N/A	N/A	N/A			Yes	Yes	Yes	Yes
242	Yes, we are actively involved		N/A		N/A	N/A	N/A	N/A			Yes	No	Yes	Yes
243	Yes, we provide information		N/A		Yes	Yes	Yes	No			N/A	N/A	N/A	N/A
244	Yes, we are actively involved		N/A		N/A	N/A	N/A	N/A			Yes	Yes	No	Yes
245	Yes, we are actively involved		N/A		N/A	N/A	N/A	N/A			Yes	Yes	Yes	Yes
246	Yes, we provide information		N/A		Yes	No	No	Yes			N/A	N/A	N/A	N/A
247	Yes, we are actively involved		N/A		N/A	N/A	N/A	N/A			Yes	No	No	Yes
248	Yes, we provide information		N/A		Yes	No	Yes	Yes	seminars, workshops		N/A	N/A	N/A	N/A
249	Yes, we are actively involved		N/A		N/A	N/A	N/A	N/A			Yes	Yes	No	No
250	Yes, we provide information		N/A		Yes	No	No	Yes			N/A	N/A	N/A	N/A
251	Yes, we provide information		N/A		Yes	No	No	No			N/A	N/A	N/A	N/A
252	Yes, we provide information		N/A		No	No	No	No	actively involved on demain - on all available platforms		N/A	N/A	N/A	N/A
253	Yes, we provide information		N/A		Yes	Yes	Yes	Yes			N/A	N/A	N/A	N/A
254	Yes, we provide information		N/A		Yes	No	No	Yes			N/A	N/A	N/A	N/A
255	Yes, we are actively involved		N/A		N/A	N/A	N/A	N/A			Yes	Yes	Yes	Yes
256	Yes, we are actively involved		N/A		N/A	N/A	N/A	N/A			Yes	Yes	Yes	Yes
257	Yes, we are actively involved		N/A		N/A	N/A	N/A	N/A			Yes	Yes	Yes	Yes
258	Yes, we provide information		N/A		Yes	No	No	Yes			N/A	N/A	N/A	N/A
259	Yes, we are actively involved		N/A		N/A	N/A	N/A	N/A			Yes	Yes	Yes	Yes
260	Yes, we provide information		N/A		Yes	Yes	Yes	Yes			N/A	N/A	N/A	N/A
261	Yes, we are actively involved		N/A		N/A	N/A	N/A	N/A			Yes	Yes	Yes	Yes
262	Yes, we are actively involved		N/A		N/A	N/A	N/A	N/A			Yes	No	No	No
263	Yes, we provide information		N/A		Yes	No	Yes	No			N/A	N/A	N/A	N/A
264	Yes, we are actively involved		N/A		N/A	N/A	N/A	N/A			Yes	Yes	Yes	Yes
265	Yes, we are actively involved		N/A		N/A	N/A	N/A	N/A			Yes	Yes	Yes	Yes
266	Yes, we provide information		N/A		Yes	Yes	Yes	Yes			N/A	N/A	N/A	N/A
267	Yes, we are actively involved		N/A		N/A	N/A	N/A	N/A			Yes	No	No	Yes
268	Yes, we are actively involved		N/A		N/A	N/A	N/A	N/A			Yes	No	No	No
269	Yes, we provide information		N/A		Yes	No	Yes	Yes			N/A	N/A	N/A	N/A
270	Yes, we are actively involved		N/A		N/A	N/A	N/A	N/A			Yes	Yes	Yes	Yes
271	Yes, we are actively involved		N/A		N/A	N/A	N/A	N/A			Yes	No	No	No
272	Yes, we provide information		N/A		Yes	Yes	Yes	Yes			N/A	N/A	N/A	N/A
273	Yes, we provide information		N/A		Yes	Yes	Yes	Yes			N/A	N/A	N/A	N/A
274	Yes, we are actively involved		N/A		N/A	N/A	N/A	N/A			Yes	Yes	Yes	Yes
275	Yes, we are actively involved		N/A		N/A	N/A	N/A	N/A			Yes	No	Yes	Yes
276	Yes, we are actively involved		N/A		N/A	N/A	N/A	N/A			Yes	Yes	Yes	Yes

## Sheet: 5
	Do you provide information to the user on sample preparation?	If no, would that be important for you to provide?	Do you know what controls the user includes?	Do you know how the user prepares the samples?	If you are aware of poor sample quality do you allow the user to proceed?		Do you provide information to the user on sample preparation?	all		full-service	hybrid-service	self-service		flow cytometry	genomics	histology	metabolomics	microscopy	mouse/rat	protein expression	proteomics		Do you know what controls the user includes?	control	full-service	hybrid-service	self-service		flow cytometry	genomics	histology	metabolomics	microscopy	mouse/rat	protein expression	proteomics		Do you know how the user prepares the samples?	sample	full-service	hybrid-service	self-service		flow cytometry	genomics	histology	metabolomics	microscopy	mouse/rat
1	Yes	N/A	always	always	No		Yes	263		71	166	26		48	32	11	8	62	15	8	35		never	3	1	1	1		0	0	0	0	0	0	0	0		never	3	2	1	0		0	0	0	0	0	0
2	Yes	N/A	rarely	often	No		No	12		0	9	2		2	1	0	0	0	1	0	0		rarely	15	6	6	3		1	1	0	0	5	3	1	1		rarely	15	1	11	3		5	0	0	0	6	1
3	Yes	N/A	sometimes	sometimes	No			275															sometimes	88	17	56	15		22	14	6	2	22	3	4	3		sometimes	83	14	55	14		25	10	3	0	20	6
4	Yes	N/A	always	often	Yes																		often	94	20	65	9		21	8	2	3	26	5	1	13		often	113	33	70	10		19	17	6	5	26	3
5	Yes	N/A	often	often	Yes																		always	75	28	47	0		6	10	3	3	9	5	2	18		always	61	22	38	1		1	6	2	3	10	6
6	Yes	N/A	always	always	No																			275															275
7	Yes	N/A	sometimes	always	No
8	Yes	N/A	sometimes	often	No
9	Yes	N/A	sometimes	sometimes	No
10	Yes	N/A	often	often	Yes
11	Yes	N/A	sometimes	often	Yes
12	Yes	N/A	always	always	No
13	Yes	N/A	often	sometimes	Yes
14	Yes	N/A	often	always	No
15	Yes	N/A	always	often	Yes
16	Yes	N/A	often	often	Yes
17	No	No	never	sometimes	No
18	Yes	N/A	sometimes	often	No
19	No	No	often	often	No
20	Yes	N/A	often	always	No
21	Yes	N/A	sometimes	always	No
22	Yes	N/A	sometimes	sometimes	No
23	Yes	N/A	rarely	sometimes	Yes
24	Yes	N/A	often	often	Yes
25	Yes	N/A	sometimes	sometimes	Yes
26	Yes	N/A	always	often	Yes
27	Yes	N/A	sometimes	often	Yes
28	Yes	N/A	often	often	No
29	Yes	N/A	always	always	No
30	Yes	N/A	often	often	No
31	Yes	N/A	rarely	sometimes	No
32	Yes	N/A	always	always	No
33	Yes	N/A	sometimes	sometimes	No
34	Yes	N/A	often	often	Yes
35	Yes	N/A	always	always	No
36	Yes	N/A	sometimes	often	Yes
37	Yes	N/A	often	often	Yes
38	Yes	N/A	rarely	sometimes	No
39	Yes	N/A	always	always	No
40	Yes	N/A	often	often	No
41	Yes	N/A	sometimes	sometimes	Yes
42	Yes	N/A	sometimes	often	No
43	Yes	N/A	sometimes	sometimes	No
44	Yes	N/A	often	often	No
45	Yes	N/A	always	always	No
46	Yes	N/A	sometimes	sometimes	No
47	Yes	N/A	often	often	No
48	Yes	N/A	often	often	No
49	Yes	N/A	sometimes	sometimes	No
50	Yes	N/A	often	often	No
51	Yes	N/A	always	often	No
52	Yes	N/A	often	often	No
53	Yes	N/A	rarely	rarely	No
54	Yes	N/A	often	often	Yes
55	Yes	N/A	sometimes	often	No
56	Yes	N/A	often	always	Yes
57	Yes	N/A	sometimes	often	No
58	Yes	N/A	often	often	Yes
59	Yes	N/A	sometimes	rarely	Yes
60	Yes	N/A	sometimes	sometimes	No
61	Yes	N/A	always	always	rarely
62	Yes	N/A	often	sometimes	never
63	Yes	N/A	rarely	rarely	sometimes
64	Yes	N/A	always	often	rarely
65	Yes	N/A	often	often	rarely
66	Yes	N/A	sometimes	sometimes	rarely
67	Yes	N/A	often	often	never
68	Yes	N/A	always	always	never
69	Yes	N/A	sometimes	sometimes	always
70	Yes	N/A	always	always	sometimes
71	Yes	N/A	often	often	sometimes
72	Yes	N/A	sometimes	often	sometimes
73	Yes	N/A	often	sometimes	sometimes
74	Yes	N/A	always	always	never
75	Yes	N/A	sometimes	sometimes	often
76	Yes	N/A	always	always	never
77	Yes	N/A	often	sometimes	rarely
78	No	No	always	often	often
79	Yes	N/A	often	often	always
80	Yes	N/A	always	often	rarely
81	No	No	never	never	never
82	No	No	always	sometimes	sometimes
83	Yes	N/A	always	often	rarely
84	Yes	N/A	often	sometimes	rarely
85	Yes	N/A	always	always	sometimes
86	Yes	N/A	sometimes	sometimes	always
87	Yes	N/A	sometimes	sometimes	never
88	Yes	N/A	sometimes	sometimes	always
89	Yes	N/A	often	often	never
90	Yes	N/A	often	sometimes	sometimes
91	Yes	N/A	sometimes	sometimes	sometimes
92	Yes	N/A	always	sometimes	never
93	Yes	N/A	always	often	sometimes
94	Yes	N/A	often	often	sometimes
95	Yes	N/A	sometimes	sometimes	sometimes
96	Yes	N/A	always	often	rarely
97	Yes	N/A	sometimes	sometimes	rarely
98	Yes	N/A	often	often	rarely
99	Yes	N/A	often	sometimes	rarely
100	Yes	N/A	always	often	sometimes
101	No	No	sometimes	often	often
102	Yes	N/A	sometimes	sometimes	sometimes
103	Yes	N/A	always	always	rarely
104	No	No	never	never	sometimes
105	Yes	N/A	always	always	rarely
106	Yes	N/A	always	always	sometimes
107	Yes	N/A	sometimes	sometimes	sometimes
108	Yes	N/A	always	always	never
109	Yes	N/A	often	often	rarely
110	Yes	N/A	often	often	sometimes
111	Yes	N/A	always	always	rarely
112	Yes	N/A	often	often	rarely
113	Yes	N/A	often	often	rarely
114	Yes	N/A	sometimes	sometimes	rarely
115	Yes	N/A	often	often	sometimes
116	Yes	N/A	always	always	rarely
117	Yes	N/A	often	sometimes	often
118	Yes	N/A	always	sometimes	rarely
119	Yes	N/A	sometimes	sometimes	sometimes
120	Yes	N/A	always	often	rarely
121	Yes	N/A	sometimes	often	rarely
122	Yes	N/A	often	often	rarely
123	Yes	N/A	often	often	rarely
124	Yes	N/A	sometimes	sometimes	rarely
125	Yes	N/A	often	sometimes	rarely
126	Yes	N/A	rarely	rarely	always
127	Yes	N/A	sometimes	often	rarely
128	Yes	N/A	often	often	sometimes
129	Yes	N/A	often	often	sometimes
130	Yes	N/A	often	often	sometimes
131	Yes	N/A	often	sometimes	rarely
132	Yes	N/A	sometimes	often	often
133	Yes	N/A	sometimes	sometimes	rarely
134	Yes	N/A	always	often	rarely
135	Yes	N/A	often	sometimes	sometimes
136	Yes	N/A	often	often	sometimes
137	Yes	N/A	sometimes	sometimes	sometimes
138	Yes	N/A	often	rarely	rarely
139	Yes	N/A	sometimes	often	sometimes
140	Yes	N/A	often	always	sometimes
141	Yes	N/A	sometimes	sometimes	rarely
142	Yes	N/A	often	often	sometimes
143	Yes	N/A	sometimes	sometimes	rarely
144	Yes	N/A	sometimes	sometimes	sometimes
145	Yes	N/A	always	often	sometimes
146	Yes	N/A	sometimes	sometimes	never
147	Yes	N/A	often	sometimes	sometimes
148	Yes	N/A	sometimes	sometimes	often
149	Yes	N/A	always	always	rarely
150	Yes	N/A	sometimes	sometimes	rarely
151	Yes	N/A	often	often	never
152	Yes	N/A	sometimes	sometimes	sometimes
153	Yes	N/A	always	often	rarely
154	Yes	N/A	sometimes	often	rarely
155	Yes	N/A	sometimes	sometimes	rarely
156	Yes	N/A	often	often	sometimes
157	Yes	N/A	often	often	always
158	Yes	N/A	always	often	sometimes
159	Yes	N/A	often	sometimes	rarely
160	Yes	N/A	always	sometimes	always
161	Yes	N/A	sometimes	often	sometimes
162	Yes	N/A	sometimes	often	sometimes
163	Yes	N/A	always	always	sometimes
164	Yes	N/A	often	often	sometimes
165	Yes	N/A	always	always	never
166	Yes	N/A	often	sometimes	sometimes
167	Yes	N/A	sometimes	rarely	sometimes
168	Yes	N/A	always	always	never
169	Yes	N/A	sometimes	sometimes	sometimes
170	Yes	N/A	rarely	rarely	often
171	Yes	N/A	always	always	rarely
172	Yes	N/A	often	often	rarely
173	Yes	N/A	sometimes	sometimes	rarely
174	Yes	N/A	sometimes	rarely	often
175	Yes	N/A	sometimes	often	sometimes
176	Yes	N/A	often	often	rarely
177	Yes	N/A	rarely	rarely	sometimes
178	Yes	N/A	often	sometimes	often
179	Yes	N/A	often	always	rarely
180	Yes	N/A	sometimes	sometimes	sometimes
181	Yes	N/A	rarely	sometimes	never
182	Yes	N/A	sometimes	often	never
183	Yes	N/A	often	often	rarely
184	Yes	N/A	often	sometimes	rarely
185	Yes	N/A	sometimes	often	often
186	Yes	N/A	rarely	always	often
187	Yes	N/A	often	often	sometimes
188	Yes	N/A	sometimes	often	rarely
189	Yes	N/A	sometimes	sometimes	rarely
190	Yes	N/A	always	rarely	always
191	Yes	N/A	always	always	rarely
192	Yes	N/A	always	always	rarely
193	No	No	rarely	rarely	always
194	Yes	N/A	rarely	rarely	often
195	No	No	often	sometimes	rarely
196	Yes	N/A	always	often	rarely
197	Yes	N/A	always	always	rarely
198	Yes	N/A	always	often	always
199	Yes	N/A	always	always	rarely
200	Yes	N/A	always	often	often
201	Yes	N/A	often	always	sometimes
202	Yes	N/A	often	always	never
203	Yes	N/A	sometimes	sometimes	sometimes
204	Yes	N/A	always	sometimes	sometimes
205	Yes	N/A	always	always	sometimes
206	Yes	N/A	often	often	rarely
207	Yes	N/A	often	always	rarely
208	Yes	N/A	rarely	often	never
209	Yes	N/A	always	always	never
210	Yes	N/A	sometimes	sometimes	sometimes
211	Yes	N/A	often	always	sometimes
212	Yes	N/A	sometimes	often	sometimes
213	Yes	N/A	sometimes	sometimes	always
214	Yes	N/A	sometimes	sometimes	sometimes
215	No	No	always	always	never
216	Yes	N/A	sometimes	sometimes	sometimes
217	Yes	N/A	sometimes	sometimes	often
218	Yes	N/A	sometimes	rarely	never
219	Yes	N/A	always	always	never
220	Yes	N/A	always	always	rarely
221	Yes	N/A	sometimes	often	sometimes
222	Yes	N/A	sometimes	sometimes	rarely
223	Yes	N/A	often	often	sometimes
224	Yes	N/A	always	always	always
225	Yes	N/A	sometimes	sometimes	rarely
226	Yes	N/A	often	sometimes	always
227	Yes	N/A	always	always	sometimes
228	Yes	N/A	sometimes	always	rarely
229	Yes	N/A	often	rarely	always
230	Yes	N/A	always	always	rarely
231	Yes	N/A	often	often	rarely
232	Yes	N/A	often	often	sometimes
233	Yes	N/A	often	often	sometimes
234	Yes	N/A	always	always	rarely
235	Yes	N/A	often	often	sometimes
236	Yes	N/A	sometimes	often	rarely
237	Yes	N/A	often	often	sometimes
238	Yes	N/A	often	often	sometimes
239	Yes	N/A	often	often	sometimes
240	N/A	N/A
241	Yes	N/A	always	often	rarely
242	Yes	N/A	always	always	sometimes
243	Yes	N/A	always	often	rarely
244	Yes	N/A	always	always	rarely
245	No	No	often	often	always
246	Yes	N/A	sometimes	often	rarely
247	Yes	N/A	always	often	rarely
248	Yes	N/A	often	often	sometimes
249	Yes	N/A	often	often	sometimes
250	Yes	N/A	sometimes	often	rarely
251	Yes	N/A	often	rarely	rarely
252	Yes	N/A	sometimes	sometimes	often
253	Yes	N/A	often	sometimes	often
254	Yes	N/A	rarely	often	rarely
255	Yes	N/A	always	always	rarely
256	Yes	N/A	often	often	rarely
257	Yes	N/A	always	often	often
258	Yes	N/A	sometimes	sometimes	often
259	Yes	N/A	often	often	sometimes
260	Yes	N/A	often	often	sometimes
261	Yes	N/A	always	always	never
262	Yes	N/A	sometimes	sometimes	sometimes
263	Yes	N/A	always	always	rarely
264	Yes	N/A	often	always	rarely
265	Yes	N/A	sometimes	always	sometimes
266	No	No	sometimes	sometimes	often
267	Yes	N/A	sometimes	sometimes	always
268	Yes	N/A	often	always	rarely
269	Yes	N/A	always	never	rarely
270	Yes	N/A	sometimes	often	never
271	Yes	N/A	always	always	sometimes
272	Yes	N/A	sometimes	sometimes	rarely
273	Yes	N/A	often	sometimes	never
274	Yes	N/A	always	always	sometimes
275	Yes	N/A	sometimes	sometimes	rarely
276	Yes	N/A	often	often	sometimes
[truncated: 15 more columns]

[truncated: 11 more sheets: 6, 6bis, 7a, 7b, 7c, 8, 9, 10, 10bis, combined figure, explanations]
